# Supplementary material for: Serum piRNA-54265 is a New Biomarker for early detection and clinical surveillance of Human Colorectal Cancer
Source: PubMed Central journal article supplement (PMC7392023; doi:10.7150/thno.46241), 2020-07-09
Supplement: thnov10p8468s1.pdf [file thnov10p8468s1.pdf]

**A**

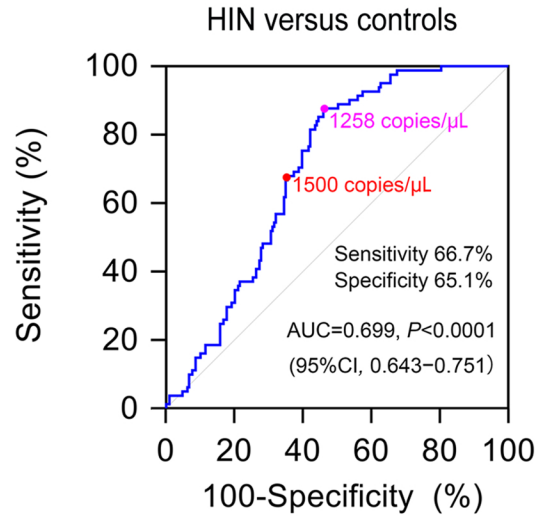

Results of Youden's index

| piR-54265 (copies/ $\mu$ L) | Sensitivity % (95%CI) | Specificity % (95%CI) |
|-----------------------------|-----------------------|-----------------------|
| 1800                        | 21.0 (12.7, 31.5)     | 84.2 (78.5, 88.9)     |
| 1698                        | 37.0 (26.6, 48.5)     | 75.6 (69.2, 81.3)     |
| 1601                        | 48.2 (36.9, 59.5)     | 70.8 (64.1, 76.9)     |
| 1501                        | 66.7 (55.3, 76.8)     | 65.1 (58.2, 71.5)     |
| 1401                        | 75.3 (64.5, 84.2)     | 58.9 (51.9, 65.6)     |
| 1301                        | 85.2 (75.6, 92.1)     | 54.1 (47.1, 61.0)     |
| 1258*                       | 87.7 (78.5, 93.9)     | 54.1 (47.1, 61.0)     |
| 1205                        | 88.9 (80.0, 94.8)     | 49.8 (42.8, 56.7)     |
| 1095                        | 92.6 (84.6, 97.2)     | 42.6 (35.8, 49.6)     |
| 983                         | 97.5 (91.4, 99.7)     | 34.5 (28.0, 41.3)     |

**B**

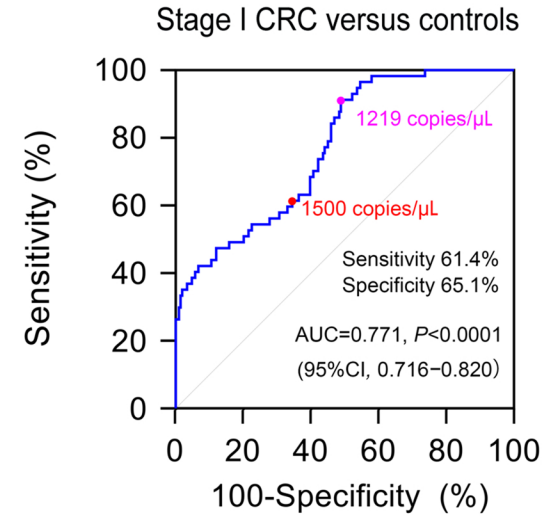

Results of Youden's index

| piR-54265 (copies/ $\mu$ L) | Sensitivity % (95%CI) | Specificity % (95%CI) |
|-----------------------------|-----------------------|-----------------------|
| 1981                        | 42.1 (29.1, 55.9)     | 93.3 (89.0, 96.3)     |
| 1901                        | 42.1 (29.1, 55.9)     | 89.5 (85.1, 93.7)     |
| 1787                        | 49.1 (35.6, 62.7)     | 84.2 (78.5, 88.9)     |
| 1709                        | 54.4 (40.7, 67.6)     | 76.1 (69.7, 81.7)     |
| 1601                        | 56.1 (42.4, 69.3)     | 70.8 (64.1, 76.9)     |
| 1501                        | 61.4 (47.6, 74.0)     | 65.1 (58.2, 71.5)     |
| 1401                        | 70.2 (56.6, 81.6)     | 58.9 (51.9, 65.6)     |
| 1304                        | 79.0 (66.1, 88.6)     | 54.6 (47.5, 61.4)     |
| 1219*                       | 91.2 (80.7, 97.1)     | 51.2 (44.2, 58.2)     |
| 1106                        | 96.5 (87.9, 99.6)     | 43.1 (36.3, 50.1)     |

**C**

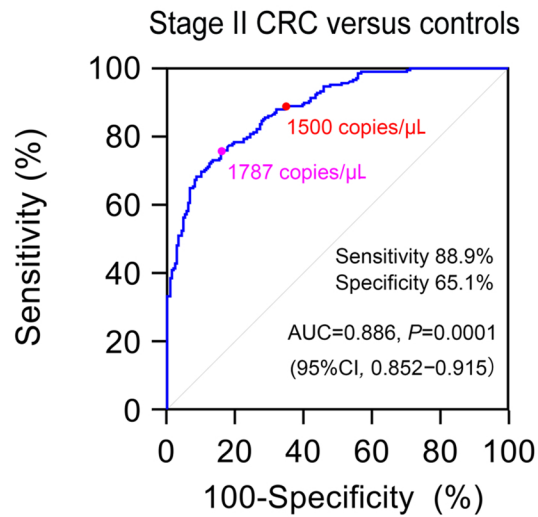

Results of Youden's index

| piR-54265 (copies/ $\mu$ L) | Sensitivity % (95%CI) | Specificity % (95%CI) |
|-----------------------------|-----------------------|-----------------------|
| 1988                        | 64.4 (57.5, 70.9)     | 93.3 (89.0, 96.3)     |
| 1901                        | 69.7 (63.0, 75.9)     | 90.0 (85.1, 93.7)     |
| 1787*                       | 76.0 (69.6, 81.6)     | 84.2 (78.5, 88.9)     |
| 1700                        | 80.3 (74.2, 85.5)     | 75.6 (69.2, 81.3)     |
| 1601                        | 85.6 (80.1, 90.1)     | 70.8 (64.1, 76.9)     |
| 1501                        | 88.9 (83.9, 92.9)     | 65.1 (58.2, 71.5)     |
| 1401                        | 89.9 (85.0, 93.6)     | 58.9 (51.9, 65.6)     |
| 1304                        | 93.3 (89.0, 96.3)     | 54.6 (47.5, 61.4)     |
| 1204                        | 95.2 (91.3, 97.7)     | 49.3 (42.3, 56.3)     |
| 1106                        | 99.1 (96.6, 99.9)     | 43.1 (36.3, 50.1)     |

**D**

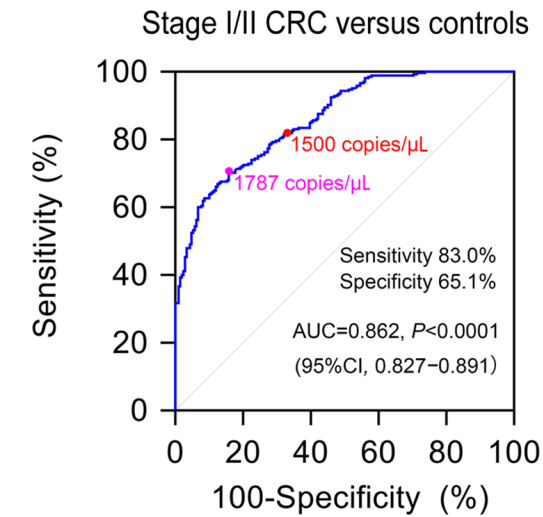

Results of Youden's index

| piR-54265 (copies/ $\mu$ L) | Sensitivity % (95%CI) | Specificity % (95%CI) |
|-----------------------------|-----------------------|-----------------------|
| 1981                        | 60.0 (53.8, 65.9)     | 93.3 (89.0, 96.3)     |
| 1900                        | 63.8 (57.7, 69.6)     | 89.5 (84.5, 93.3)     |
| 1787*                       | 70.2 (64.3, 75.6)     | 84.2 (78.5, 88.9)     |
| 1700                        | 74.7 (69.0, 79.8)     | 75.6 (69.2, 81.3)     |
| 1601                        | 79.3 (73.9, 84.0)     | 70.8 (64.1, 76.9)     |
| 1501                        | 83.0 (77.9, 87.3)     | 65.1 (58.2, 71.5)     |
| 1401                        | 85.7 (80.9, 89.6)     | 58.9 (51.9, 65.6)     |
| 1304                        | 90.2 (86.0, 93.5)     | 54.6 (47.5, 61.4)     |
| 1205                        | 94.3 (90.8, 96.8)     | 49.8 (42.8, 56.7)     |
| 1106                        | 98.5 (96.2, 99.6)     | 43.1 (36.3, 50.1)     |

## Supplementary Figure Legends

**Figure S1. Serum piR-54265 is an early specific marker for CRC. A–D,** The performance of serum piR-54265 levels in discriminating HIN (**A**) or stage I (**B**) or stage II (**C**) or stage I and II (**D**) of CRC patients and CRC-free controls by receiver operating characteristic (ROC) curves analysis. Pink and red dots indicate the example cut-off values estimated by Youden's index analysis. AUC, area under ROC curves.

## Supplementary tables

### Table of Contents

|                                                                                                                                                                                     |     |
|-------------------------------------------------------------------------------------------------------------------------------------------------------------------------------------|-----|
| <b>Table S1.</b> Clinical characteristics and serum piR-54265 level of CRC-free controls and patients with different cancer in this study.....                                      | 4   |
| <b>Table S2.</b> Demographic and clinical characteristics and serum piR-54265 level of patients with CRC.....                                                                       | 43  |
| <b>Table S3.</b> General characteristics of participants in the nested case-control analysis derived from the Dongfeng-Tongji prospective cohort.....                               | 60  |
| <b>Table S4.</b> The accumulated numbers of incident CRC cases diagnosed by years in the prospective Dongfeng-Tongji cohort.....                                                    | 61  |
| <b>Table S5.</b> Demographic characteristics, clinical features and serum piR-54265 level of the participants in prospective case-control analysis from Dongfeng-Tongji cohort..... | 62  |
| <b>Table S6.</b> Primers and probes used for droplet digital PCR in this study.....                                                                                                 | 96  |
| <b>Table S7.</b> The piR-54265 levels of 30 serum specimens in two detection batches (copy/ $\mu$ L).....                                                                           | 97  |
| <b>Table S8.</b> Comparison of serum piR-54265 with other blood markers for the efficacy of recognizing patients with colorectal cancer.....                                        | 98  |
| <b>Table S9.</b> The ability of prediagnostic serum piR-54265, CEA, CA125 and CA19-9 alone or combination for predicting future CRC.....                                            | 99  |
| <b>Table S10.</b> Comparison of prediagnostic serum piR-54265 with other blood markers for the efficacy of recognizing future CRC patients.....                                     | 100 |

**Table S1.** Clinical characteristics and serum piR-54265 level of CRC-free controls and patients with different cancer in this study

| Sample_ID | Subject <sup>1</sup> | Center <sup>2</sup> | Sex    | Age (year) | Serum piR-54265 <sup>3</sup> |      |
|-----------|----------------------|---------------------|--------|------------|------------------------------|------|
|           |                      |                     |        |            | copy/ $\mu$ L                | SEM  |
| Ctrl1     | Control              | SYSUCC              | Male   | 57         | 2063.6                       | 10.2 |
| Ctrl2     | Control              | SYSUCC              | Female | 56         | 620.9                        | 20.5 |
| Ctrl3     | Control              | SYSUCC              | Male   | 54         | 1513.4                       | 18.1 |
| Ctrl4     | Control              | SYSUCC              | Female | 26         | 1608.3                       | 2.9  |
| Ctrl5     | Control              | SYSUCC              | Female | 40         | 1480.1                       | 29.0 |
| Ctrl6     | Control              | SYSUCC              | Female | 39         | 1835.5                       | 12.0 |
| Ctrl7     | Control              | SYSUCC              | Male   | 36         | 1900.9                       | 18.0 |
| Ctrl8     | Control              | SYSUCC              | Male   | 44         | 2090.2                       | 20.5 |
| Ctrl9     | Control              | SYSUCC              | Female | 50         | 1218.8                       | 12.3 |
| Ctrl10    | Control              | SYSUCC              | Female | 48         | 1035.1                       | 21.8 |
| Ctrl11    | Control              | SYSUCC              | Female | 49         | 1477.8                       | 17.0 |
| Ctrl12    | Control              | SYSUCC              | Female | 39         | 1765.7                       | 17.6 |
| Ctrl13    | Control              | SYSUCC              | Male   | 41         | 771.3                        | 24.4 |
| Ctrl14    | Control              | SYSUCC              | Male   | 56         | 2313.1                       | 9.2  |
| Ctrl15    | Control              | SYSUCC              | Female | 44         | 696.1                        | 37.9 |
| Ctrl16    | Control              | SYSUCC              | Female | 37         | 1056                         | 13.6 |
| Ctrl17    | Control              | SYSUCC              | Male   | 41         | 1019.9                       | 21.9 |
| Ctrl18    | Control              | SYSUCC              | Female | 45         | 1204.7                       | 15.8 |
| Ctrl19    | Control              | SYSUCC              | Male   | 53         | 2385.5                       | 22.0 |
| Ctrl20    | Control              | SYSUCC              | Female | 55         | 1257.3                       | 41.7 |
| Ctrl21    | Control              | SYSUCC              | Male   | 43         | 782.5                        | 33.5 |
| Ctrl22    | Control              | SYSUCC              | Female | 35         | 1500.6                       | 19.3 |
| Ctrl23    | Control              | SYSUCC              | Female | 54         | 921.9                        | 13.0 |
| Ctrl24    | Control              | SYSUCC              | Male   | 39         | 809.3                        | 22.9 |
| Ctrl25    | Control              | SYSUCC              | Female | 53         | 1734                         | 37.2 |
| Ctrl26    | Control              | SYSUCC              | Male   | 42         | 1468                         | 22.3 |
| Ctrl27    | Control              | SYSUCC              | Male   | 45         | 875.8                        | 25.6 |
| Ctrl28    | Control              | SYSUCC              | Female | 46         | 782.4                        | 35.7 |
| Ctrl29    | Control              | SYSUCC              | Female | 42         | 691.3                        | 11.3 |
| Ctrl30    | Control              | SYSUCC              | Male   | 52         | 1895.1                       | 39.8 |
| Ctrl31    | Control              | SYSUCC              | Female | 34         | 1964.7                       | 21.7 |
| Ctrl32    | Control              | SYSUCC              | Female | 65         | 1910.7                       | 19.8 |
| Ctrl33    | Control              | SYSUCC              | Female | 36         | 904.9                        | 27.0 |
| Ctrl34    | Control              | SYSUCC              | Male   | 30         | 982.7                        | 27.0 |
| Ctrl35    | Control              | SYSUCC              | Male   | 52         | 1588.5                       | 23.1 |
| Ctrl36    | Control              | SYSUCC              | Male   | 71         | 1148.1                       | 26.4 |
| Ctrl37    | Control              | SYSUCC              | Female | 43         | 1844.5                       | 13.4 |
| Ctrl38    | Control              | SYSUCC              | Male   | 56         | 1215.6                       | 12.8 |

|        |         |        |        |    |        |      |
|--------|---------|--------|--------|----|--------|------|
| Ctrl39 | Control | SYSUCC | Female | 28 | 1023.1 | 26.8 |
| Ctrl40 | Control | SYSUCC | Female | 52 | 604.7  | 36.1 |
| Ctrl41 | Control | SYSUCC | Male   | 43 | 940.6  | 3.4  |
| Ctrl42 | Control | SYSUCC | Female | 53 | 1945.3 | 23.8 |
| Ctrl43 | Control | SYSUCC | Male   | 40 | 2234.2 | 23.6 |
| Ctrl44 | Control | SYSUCC | Male   | 44 | 1008.2 | 17.4 |
| Ctrl45 | Control | SYSUCC | Male   | 59 | 1710.9 | 29.4 |
| Ctrl46 | Control | SYSUCC | Male   | 38 | 783.8  | 33.6 |
| Ctrl47 | Control | SYSUCC | Male   | 32 | 784.8  | 15.4 |
| Ctrl48 | Control | SYSUCC | Female | 47 | 1648.2 | 31.7 |
| Ctrl49 | Control | SYSUCC | Male   | 42 | 1073.5 | 11.7 |
| Ctrl50 | Control | SYSUCC | Female | 53 | 2132.6 | 11.4 |
| Ctrl51 | Control | SYSUCC | Male   | 51 | 1181.6 | 23.6 |
| Ctrl52 | Control | SYSUCC | Male   | 54 | 1237.4 | 20.4 |
| Ctrl53 | Control | SYSUCC | Female | 48 | 1166   | 25.3 |
| Ctrl54 | Control | SYSUCC | Female | 58 | 1340.7 | 9.2  |
| Ctrl55 | Control | SYSUCC | Female | 30 | 1662.8 | 36.2 |
| Ctrl56 | Control | SYSUCC | Male   | 45 | 764    | 7.4  |
| Ctrl57 | Control | SYSUCC | Female | 52 | 1708.5 | 21.7 |
| Ctrl58 | Control | SYSUCC | Female | 37 | 1565.1 | 28.1 |
| Ctrl59 | Control | SYSUCC | Male   | 46 | 1590.1 | 16.2 |
| Ctrl60 | Control | SYSUCC | Male   | 37 | 639.5  | 11.6 |
| Ctrl61 | Control | SYSUCC | Female | 51 | 1839.9 | 0.1  |
| Ctrl62 | Control | SYSUCC | Male   | 59 | 2043.7 | 38.3 |
| Ctrl63 | Control | SYSUCC | Male   | 37 | 1712.4 | 8.6  |
| Ctrl64 | Control | SYSUCC | Female | 47 | 1332.2 | 29.7 |
| Ctrl65 | Control | SYSUCC | Female | 52 | 1839.1 | 44.4 |
| Ctrl66 | Control | SYSUCC | Male   | 40 | 779.8  | 25.2 |
| Ctrl67 | Control | SYSUCC | Female | 36 | 898.8  | 37.4 |
| Ctrl68 | Control | SYSUCC | Female | 48 | 1471.9 | 20.0 |
| Ctrl69 | Control | SYSUCC | Female | 51 | 1981.2 | 21.0 |
| Ctrl70 | Control | SYSUCC | Female | 50 | 1709.1 | 19.9 |
| Ctrl71 | Control | SYSUCC | Male   | 46 | 1224.3 | 21.2 |
| Ctrl72 | Control | SYSUCC | Male   | 32 | 1663.5 | 20.5 |
| Ctrl73 | Control | SYSUCC | Female | 39 | 1616.3 | 33.9 |
| Ctrl74 | Control | SYSUCC | Male   | 51 | 1465.1 | 18.9 |
| Ctrl75 | Control | SYSUCC | Male   | 52 | 2198.4 | 28.3 |
| Ctrl76 | Control | SYSUCC | Male   | 67 | 1179.2 | 41.6 |
| Ctrl77 | Control | SYSUCC | Male   | 49 | 1477.1 | 21.9 |
| Ctrl78 | Control | SYSUCC | Female | 43 | 1213.9 | 13.2 |
| Ctrl79 | Control | SYSUCC | Male   | 63 | 795.7  | 24.2 |
| Ctrl80 | Control | SYSUCC | Male   | 51 | 579.4  | 41.1 |
| Ctrl81 | Control | SYSUCC | Female | 47 | 706.2  | 5.3  |
| Ctrl82 | Control | SYSUCC | Female | 48 | 1051.4 | 22.1 |

|         |         |        |        |    |        |      |
|---------|---------|--------|--------|----|--------|------|
| Ctrl83  | Control | SYSUCC | Female | 54 | 1698.1 | 11.1 |
| Ctrl84  | Control | SYSUCC | Male   | 55 | 2164.6 | 32.2 |
| Ctrl85  | Control | SYSUCC | Female | 66 | 841.6  | 2.9  |
| Ctrl86  | Control | SYSUCC | Male   | 36 | 1095.3 | 44.3 |
| Ctrl87  | Control | SYSUCC | Female | 30 | 1537.6 | 35.1 |
| Ctrl88  | Control | SYSUCC | Male   | 42 | 1527.8 | 36.3 |
| Ctrl89  | Control | SYSUCC | Male   | 54 | 613.8  | 21.6 |
| Ctrl90  | Control | SYSUCC | Female | 60 | 1695.5 | 22.1 |
| Ctrl91  | Control | SYSUCC | Male   | 52 | 2253.6 | 0.1  |
| Ctrl92  | Control | SYSUCC | Male   | 45 | 2261.5 | 27.0 |
| Ctrl93  | Control | SYSUCC | Female | 51 | 1406.2 | 13.0 |
| Ctrl94  | Control | SYSUCC | Female | 45 | 1068.1 | 25.7 |
| Ctrl95  | Control | SYSUCC | Female | 48 | 1303.7 | 2.8  |
| Ctrl96  | Control | SYSUCC | Female | 53 | 1017.8 | 20.5 |
| Ctrl97  | Control | SYSUCC | Female | 54 | 1306.9 | 34.0 |
| Ctrl98  | Control | SYSUCC | Female | 60 | 1194.2 | 20.9 |
| Ctrl99  | Control | SYSUCC | Female | 55 | 2154.6 | 19.1 |
| Ctrl100 | Control | SYSUCC | Female | 47 | 1561.6 | 27.3 |
| Ctrl101 | Control | SYSUCC | Female | 44 | 1721.9 | 32.1 |
| Ctrl102 | Control | SYSUCC | Male   | 45 | 1763.8 | 30.2 |
| Ctrl103 | Control | SYSUCC | Male   | 40 | 1415.8 | 22.2 |
| Ctrl104 | Control | SYSUCC | Male   | 37 | 1884.5 | 12.6 |
| Ctrl105 | Control | SYSUCC | Male   | 34 | 811.8  | 46.5 |
| Ctrl106 | Control | SYSUCC | Female | 50 | 2387.8 | 35.6 |
| Ctrl107 | Control | SYSUCC | Male   | 32 | 2072.5 | 25.3 |
| Ctrl108 | Control | SYSUCC | Male   | 44 | 1635.7 | 32.4 |
| Ctrl109 | Control | SYSUCC | Female | 49 | 883.5  | 11.9 |
| Ctrl110 | Control | SYSUCC | Female | 36 | 1785.4 | 41.4 |
| Ctrl111 | Control | SYSUCC | Male   | 47 | 1343   | 8.7  |
| Ctrl112 | Control | SYSUCC | Female | 50 | 951.6  | 18.1 |
| Ctrl113 | Control | SYSUCC | Female | 50 | 729.8  | 8.4  |
| Ctrl114 | Control | SYSUCC | Female | 51 | 1781   | 6.6  |
| Ctrl115 | Control | SYSUCC | Female | 55 | 1850.9 | 8.8  |
| Ctrl116 | Control | SYSUCC | Male   | 50 | 1113.4 | 31.8 |
| Ctrl117 | Control | SYSUCC | Male   | 51 | 1873.6 | 25.5 |
| Ctrl118 | Control | SYSUCC | Male   | 54 | 642.4  | 21.8 |
| Ctrl119 | Control | SYSUCC | Female | 28 | 1054.5 | 37.8 |
| Ctrl120 | Control | SYSUCC | Male   | 56 | 1837.6 | 19.4 |
| Ctrl121 | Control | SYSUCC | Male   | 60 | 1978.3 | 29.6 |
| Ctrl122 | Control | SYSUCC | Female | 61 | 862.6  | 34.4 |
| Ctrl123 | Control | SYSUCC | Male   | 52 | 612    | 38.3 |
| Ctrl124 | Control | SYSUCC | Female | 42 | 1725.1 | 30.2 |
| Ctrl125 | Control | SYSUCC | Female | 63 | 1861.3 | 21.4 |
| Ctrl126 | Control | SYSUCC | Female | 51 | 1755.8 | 18.9 |

|         |         |        |        |    |         |      |
|---------|---------|--------|--------|----|---------|------|
| Ctrl127 | Control | SYSUCC | Female | 41 | 509.1   | 10.3 |
| Ctrl128 | Control | SYSUCC | Female | 29 | 506.7   | 28.5 |
| Ctrl129 | Control | SYSUCC | Female | 28 | 878.27  | 79.6 |
| Ctrl130 | Control | SYSUCC | Female | 26 | 906.36  | 47.5 |
| Ctrl131 | Control | SYSUCC | Male   | 30 | 585.04  | 38.6 |
| Ctrl132 | Control | SYSUCC | Female | 35 | 485.1   | 16.9 |
| Ctrl133 | Control | SYSUCC | Female | 26 | 484.84  | 46.4 |
| Ctrl134 | Control | SYSUCC | Male   | 26 | 721.4   | 105  |
| Ctrl135 | Control | SYSUCC | Male   | 32 | 458.46  | 47.3 |
| Ctrl136 | Control | SYSUCC | Male   | 31 | 665.83  | 30.8 |
| Ctrl137 | Control | SYSUCC | Female | 28 | 1203.5  | 68.8 |
| Ctrl138 | Control | SYSUCC | Female | 27 | 825     | 18.4 |
| Ctrl139 | Control | SYSUCC | Female | 26 | 720.6   | 30.7 |
| Ctrl140 | Control | SYSUCC | Male   | 26 | 876.88  | 55.6 |
| Ctrl141 | Control | SYSUCC | Male   | 26 | 679.81  | 12.0 |
| Ctrl142 | Control | SYSUCC | Male   | 28 | 631.54  | 77.9 |
| Ctrl143 | Control | SYSUCC | Female | 28 | 923.3   | 36.6 |
| Ctrl144 | Control | SYSUCC | Female | 26 | 692.18  | 55.0 |
| Ctrl145 | Control | SYSUCC | Male   | 28 | 1601.24 | 23.8 |
| Ctrl146 | Control | SYSUCC | Male   | 33 | 1181.8  | 24.5 |
| Ctrl147 | Control | SYSUCC | Male   | 31 | 1012.3  | 15.8 |
| Ctrl148 | Control | SYSUCC | Male   | 31 | 1534.61 | 29.7 |
| Ctrl149 | Control | SYSUCC | Female | 26 | 562.4   | 60.7 |
| Ctrl150 | Control | SYSUCC | Male   | 33 | 688.38  | 82.2 |
| Ctrl151 | Control | SYSUCC | Male   | 25 | 1320.8  | 28.4 |
| Ctrl152 | Control | SYSUCC | Female | 22 | 1530.8  | 6.4  |
| Ctrl153 | Control | SYSUCC | Female | 32 | 955.3   | 32.2 |
| Ctrl154 | Control | SYSUCC | Female | 23 | 976.5   | 13.9 |
| Ctrl155 | Control | SYSUCC | Male   | 41 | 1063.1  | 29.7 |
| Ctrl156 | Control | SYSUCC | Male   | 30 | 663.6   | 25.5 |
| Ctrl157 | Control | SYSUCC | Female | 46 | 1679    | 21.9 |
| Ctrl158 | Control | SYSUCC | Female | 46 | 1105.8  | 11.2 |
| Ctrl159 | Control | SYSUCC | Female | 41 | 735.1   | 23.8 |
| Ctrl160 | Control | SYSUCC | Female | 48 | 1734.9  | 18.2 |
| Ctrl161 | Control | SYSUCC | Male   | 26 | 1237.6  | 18.1 |
| Ctrl162 | Control | SYSUCC | Male   | 41 | 976.7   | 17.7 |
| Ctrl163 | Control | SYSUCC | Female | 24 | 852.7   | 26.9 |
| Ctrl164 | Control | SYSUCC | Female | 50 | 1920    | 32.4 |
| Ctrl165 | Control | SYSUCC | Male   | 45 | 1228.9  | 2.5  |
| Ctrl166 | Control | SYSUCC | Female | 45 | 1758.1  | 27.3 |
| Ctrl167 | Control | SYSUCC | Male   | 45 | 1258.2  | 13.3 |
| Ctrl168 | Control | SYSUCC | Female | 38 | 749.3   | 21.2 |
| Ctrl169 | Control | SYSUCC | Male   | 48 | 1883    | 29.8 |
| Ctrl170 | Control | SYSUCC | Female | 46 | 1680.9  | 28.2 |

|         |         |        |        |    |        |       |
|---------|---------|--------|--------|----|--------|-------|
| Ctrl171 | Control | SYSUCC | Female | 36 | 808.8  | 14.8  |
| Ctrl172 | Control | SYSUCC | Male   | 36 | 1527.4 | 21.5  |
| Ctrl173 | Control | SYSUCC | Female | 26 | 1191   | 21.3  |
| Ctrl174 | Control | SYSUCC | Male   | 23 | 1915.4 | 31.4  |
| Ctrl175 | Control | SYSUCC | Male   | 29 | 1386.1 | 18.7  |
| Ctrl176 | Control | SYSUCC | Female | 41 | 720.5  | 9.7   |
| Ctrl177 | Control | SYSUCC | Female | 37 | 1165.7 | 16.8  |
| Ctrl178 | Control | SYSUCC | Male   | 30 | 565.5  | 13.5  |
| Ctrl179 | Control | SYSUCC | Female | 22 | 1787.4 | 9.8   |
| Ctrl180 | Control | SYSUCC | Female | 41 | 1779.3 | 13.5  |
| Ctrl181 | Control | SYSUCC | Female | 38 | 817.3  | 26.1  |
| Ctrl182 | Control | SYSUCC | Male   | 42 | 1750.4 | 29.7  |
| Ctrl183 | Control | SYSUCC | Male   | 27 | 1460.4 | 42.5  |
| Ctrl184 | Control | SYSUCC | Female | 39 | 1345   | 11.7  |
| Ctrl185 | Control | SYSUCC | Female | 30 | 1073.6 | 36.4  |
| Ctrl186 | Control | SYSUCC | Male   | 31 | 932.5  | 72.7  |
| Ctrl187 | Control | SYSUCC | Male   | 46 | 1315.4 | 100.8 |
| Ctrl188 | Control | SYSUCC | Female | 28 | 1009.8 | 43.3  |
| Ctrl189 | Control | SYSUCC | Female | 46 | 1493.1 | 29.6  |
| Ctrl190 | Control | SYSUCC | Male   | 32 | 713.8  | 72.5  |
| Ctrl191 | Control | SYSUCC | Female | 38 | 1404.6 | 3.7   |
| Ctrl192 | Control | SYSUCC | Female | 44 | 1047.8 | 39.1  |
| Ctrl193 | Control | SYSUCC | Female | 26 | 1473.4 | 93.4  |
| Ctrl194 | Control | SYSUCC | Male   | 25 | 1552.9 | 24.9  |
| Ctrl195 | Control | SYSUCC | Male   | 36 | 1727.2 | 50.6  |
| Ctrl196 | Control | SYSUCC | Female | 42 | 1401   | 33.3  |
| Ctrl197 | Control | SYSUCC | Female | 20 | 1148   | 15.2  |
| Ctrl198 | Control | SYSUCC | Female | 44 | 760.5  | 29.3  |
| Ctrl199 | Control | SYSUCC | Female | 35 | 952.3  | 53.9  |
| Ctrl200 | Control | SYSUCC | Male   | 44 | 1109.1 | 24.2  |
| Ctrl201 | Control | SYSUCC | Male   | 47 | 1141.2 | 57.2  |
| Ctrl202 | Control | SYSUCC | Male   | 34 | 1041.6 | 57.7  |
| Ctrl203 | Control | SYSUCC | Female | 34 | 748.9  | 22.8  |
| Ctrl204 | Control | SYSUCC | Female | 48 | 778.5  | 32.7  |
| Ctrl205 | Control | SYSUCC | Male   | 31 | 780.8  | 61.3  |
| Ctrl206 | Control | SYSUCC | Female | 26 | 861.5  | 20.9  |
| Ctrl207 | Control | SYSUCC | Male   | 27 | 545.2  | 87.7  |
| Ctrl208 | Control | SYSUCC | Female | 21 | 545.6  | 44.8  |
| Ctrl209 | Control | SYSUCC | Female | 44 | 569.9  | 30.6  |
| ESCC1   | ESCC    | CHCAMS | Male   | 57 | 2454.0 | 2.0   |
| ESCC2   | ESCC    | CHCAMS | Male   | 47 | 2516.0 | 2.3   |
| ESCC3   | ESCC    | CHCAMS | Male   | 26 | 1306.0 | 1.4   |
| ESCC4   | ESCC    | CHCAMS | Male   | 48 | 1064.0 | 1.2   |
| ESCC5   | ESCC    | CHCAMS | Female | 64 | 1462.0 | 2.1   |



|        |      |        |        |    |        |     |
|--------|------|--------|--------|----|--------|-----|
| ESCC6  | ESCC | CHCAMS | Female | 71 | 1323.0 | 2.2 |
| ESCC7  | ESCC | CHCAMS | Female | 63 | 1440.0 | 2.5 |
| ESCC8  | ESCC | CHCAMS | Male   | 38 | 1496.0 | 2.7 |
| ESCC9  | ESCC | CHCAMS | Male   | 30 | 1280.0 | 2.4 |
| ESCC10 | ESCC | CHCAMS | Female | 26 | 1052.0 | 2.0 |
| ESCC11 | ESCC | CHCAMS | Female | 62 | 1340.0 | 2.6 |
| ESCC12 | ESCC | CHCAMS | Male   | 45 | 1603.0 | 3.2 |
| ESCC13 | ESCC | CHCAMS | Male   | 74 | 1666.0 | 3.5 |
| ESCC14 | ESCC | CHCAMS | Male   | 56 | 1444.0 | 3.1 |
| ESCC15 | ESCC | CHCAMS | Female | 51 | 1607.0 | 3.8 |
| ESCC16 | ESCC | CHCAMS | Male   | 63 | 1372.0 | 3.4 |
| ESCC17 | ESCC | CHCAMS | Female | 44 | 1036.0 | 2.5 |
| ESCC18 | ESCC | CHCAMS | Female | 70 | 1453.0 | 3.6 |
| ESCC19 | ESCC | CHCAMS | Male   | 45 | 2332.0 | 5.8 |
| ESCC20 | ESCC | CHCAMS | Female | 42 | 1607.0 | 4.0 |
| ESCC21 | ESCC | CHCAMS | Female | 51 | 1857.0 | 4.7 |
| ESCC22 | ESCC | CHCAMS | Female | 62 | 953.0  | 2.4 |
| ESCC23 | ESCC | CHCAMS | Male   | 67 | 1335.0 | 3.4 |
| ESCC24 | ESCC | CHCAMS | Male   | 65 | 1857.0 | 4.8 |
| ESCC25 | ESCC | CHCAMS | Male   | 74 | 1367.1 | 3.8 |
| ESCC26 | ESCC | CHCAMS | Male   | 70 | 1230.0 | 3.6 |
| ESCC27 | ESCC | CHCAMS | Female | 53 | 1455.0 | 4.2 |
| ESCC28 | ESCC | CHCAMS | Female | 65 | 1765.0 | 5.4 |
| ESCC29 | ESCC | CHCAMS | Female | 58 | 1455.0 | 4.6 |
| ESCC30 | ESCC | CHCAMS | Male   | 49 | 2688.0 | 8.5 |
| ESCC31 | ESCC | CHCAMS | Female | 61 | 1425.0 | 4.6 |
| ESCC32 | ESCC | CHCAMS | Male   | 30 | 1198.0 | 4.0 |
| ESCC33 | ESCC | CHCAMS | Female | 67 | 1302.9 | 4.3 |
| ESCC34 | ESCC | CHCAMS | Male   | 27 | 1201.0 | 4.0 |
| ESCC35 | ESCC | CHCAMS | Male   | 45 | 2031.0 | 6.9 |
| ESCC36 | ESCC | CHCAMS | Male   | 73 | 575.0  | 2.0 |
| ESCC37 | ESCC | CHCAMS | Male   | 45 | 1113.9 | 3.9 |
| ESCC38 | ESCC | CHCAMS | Female | 50 | 1607.0 | 5.7 |
| ESCC39 | ESCC | CHCAMS | Female | 37 | 1160.0 | 4.2 |
| ESCC40 | ESCC | CHCAMS | Male   | 65 | 1603.0 | 5.8 |
| ESCC41 | ESCC | CHCAMS | Male   | 66 | 2316.0 | 8.7 |
| ESCC42 | ESCC | CHCAMS | Male   | 46 | 560.0  | 2.1 |
| ESCC43 | ESCC | CHCAMS | Female | 57 | 1207.0 | 4.6 |
| ESCC44 | ESCC | CHCAMS | Male   | 56 | 1215.0 | 4.7 |
| ESCC45 | ESCC | CHCAMS | Male   | 56 | 1179.0 | 4.6 |
| ESCC46 | ESCC | CHCAMS | Female | 32 | 1564.0 | 6.2 |
| ESCC47 | ESCC | CHCAMS | Female | 66 | 1556.0 | 6.2 |
| ESCC48 | ESCC | CHCAMS | Female | 69 | 1791.0 | 7.2 |
| ESCC49 | ESCC | CHCAMS | Male   | 58 | 2077.1 | 8.4 |

|        |      |        |        |    |        |      |
|--------|------|--------|--------|----|--------|------|
| ESCC50 | ESCC | CHCAMS | Female | 67 | 1455.0 | 6.1  |
| ESCC51 | ESCC | CHCAMS | Male   | 65 | 1209.0 | 5.1  |
| ESCC52 | ESCC | CHCAMS | Female | 51 | 2114.0 | 9.0  |
| ESCC53 | ESCC | CHCAMS | Male   | 52 | 1527.0 | 6.6  |
| ESCC54 | ESCC | CHCAMS | Female | 35 | 1350.0 | 5.9  |
| ESCC55 | ESCC | CHCAMS | Male   | 62 | 1370.1 | 6.0  |
| ESCC56 | ESCC | CHCAMS | Male   | 54 | 1578.0 | 7.0  |
| ESCC57 | ESCC | CHCAMS | Female | 32 | 1094.0 | 4.9  |
| ESCC58 | ESCC | CHCAMS | Female | 46 | 1396.0 | 6.3  |
| ESCC59 | ESCC | CHCAMS | Female | 54 | 1501.1 | 6.9  |
| ESCC60 | ESCC | CHCAMS | Female | 71 | 1427.0 | 6.7  |
| ESCC61 | ESCC | CHCAMS | Male   | 32 | 1324.0 | 6.4  |
| ESCC62 | ESCC | CHCAMS | Female | 50 | 1547.0 | 7.5  |
| ESCC63 | ESCC | CHCAMS | Male   | 51 | 1282.0 | 6.3  |
| ESCC64 | ESCC | CHCAMS | Male   | 65 | 1475.0 | 7.2  |
| ESCC65 | ESCC | CHCAMS | Female | 46 | 1570.0 | 7.7  |
| ESCC66 | ESCC | CHCAMS | Male   | 28 | 1309.0 | 6.4  |
| ESCC67 | ESCC | CHCAMS | Female | 38 | 1461.0 | 7.3  |
| ESCC68 | ESCC | CHCAMS | Male   | 41 | 1112.0 | 5.6  |
| ESCC69 | ESCC | CHCAMS | Female | 75 | 1319.0 | 6.6  |
| ESCC70 | ESCC | CHCAMS | Female | 43 | 1409.0 | 7.3  |
| ESCC71 | ESCC | CHCAMS | Male   | 46 | 958.0  | 5.0  |
| ESCC72 | ESCC | CHCAMS | Female | 72 | 1275.0 | 6.8  |
| ESCC73 | ESCC | CHCAMS | Male   | 42 | 1472.0 | 7.8  |
| ESCC74 | ESCC | CHCAMS | Female | 60 | 1492.0 | 8.0  |
| ESCC75 | ESCC | CHCAMS | Female | 74 | 1215.9 | 6.6  |
| ESCC76 | ESCC | CHCAMS | Female | 75 | 1278.0 | 7.0  |
| ESCC77 | ESCC | CHCAMS | Female | 50 | 2495.1 | 13.7 |
| ESCC78 | ESCC | CHCAMS | Female | 34 | 1085.0 | 6.0  |
| ESCC79 | ESCC | CHCAMS | Female | 73 | 1285.0 | 7.1  |
| ESCC80 | ESCC | CHCAMS | Male   | 56 | 1248.0 | 7.0  |
| ESCC81 | ESCC | CHCAMS | Female | 74 | 1338.0 | 7.5  |
| ESCC82 | ESCC | CHCAMS | Male   | 66 | 1294.0 | 7.3  |
| ESCC83 | ESCC | CHCAMS | Male   | 27 | 1584.0 | 8.9  |
| ESCC84 | ESCC | CHCAMS | Male   | 63 | 1435.0 | 8.1  |
| ESCC85 | ESCC | CHCAMS | Female | 49 | 1121.0 | 6.4  |
| ESCC86 | ESCC | CHCAMS | Male   | 41 | 2439.0 | 14.0 |
| ESCC87 | ESCC | CHCAMS | Female | 48 | 2241.0 | 13.0 |
| ESCC88 | ESCC | CHCAMS | Male   | 75 | 1737.1 | 10.1 |
| ESCC89 | ESCC | CHCAMS | Female | 59 | 1237.0 | 7.2  |
| ESCC90 | ESCC | CHCAMS | Male   | 65 | 2316.0 | 13.7 |
| ESCC91 | ESCC | CHCAMS | Male   | 53 | 1694.0 | 10.1 |
| ESCC92 | ESCC | CHCAMS | Male   | 34 | 1369.0 | 8.1  |
| ESCC93 | ESCC | CHCAMS | Male   | 70 | 936.0  | 5.6  |

|         |      |        |        |    |        |      |
|---------|------|--------|--------|----|--------|------|
| ESCC94  | ESCC | CHCAMS | Male   | 56 | 1408.0 | 8.5  |
| ESCC95  | ESCC | CHCAMS | Male   | 32 | 1589.0 | 9.6  |
| ESCC96  | ESCC | CHCAMS | Male   | 42 | 1475.9 | 9.0  |
| ESCC97  | ESCC | CHCAMS | Female | 55 | 1482.0 | 9.0  |
| ESCC98  | ESCC | CHCAMS | Male   | 49 | 1246.0 | 7.7  |
| ESCC99  | ESCC | CHCAMS | Male   | 27 | 1489.0 | 9.3  |
| ESCC100 | ESCC | CHCAMS | Male   | 35 | 2396.0 | 15.0 |
| ESCC101 | ESCC | CHCAMS | Female | 41 | 1239.0 | 7.8  |
| ESCC102 | ESCC | CHCAMS | Male   | 27 | 1322.1 | 8.4  |
| ESCC103 | ESCC | CHCAMS | Female | 38 | 2063.1 | 13.1 |
| ESCC104 | ESCC | CHCAMS | Male   | 73 | 1561.0 | 10.2 |
| ESCC105 | ESCC | CHCAMS | Male   | 73 | 926.9  | 6.2  |
| ESCC106 | ESCC | CHCAMS | Female | 44 | 1410.0 | 9.4  |
| ESCC107 | ESCC | CHCAMS | Female | 66 | 1451.0 | 9.7  |
| ESCC108 | ESCC | CHCAMS | Female | 67 | 1327.0 | 8.9  |
| ESCC109 | ESCC | CHCAMS | Female | 29 | 2230.0 | 15.0 |
| ESCC110 | ESCC | CHCAMS | Female | 25 | 1123.0 | 7.6  |
| ESCC111 | ESCC | CHCAMS | Female | 62 | 1114.0 | 7.6  |
| ESCC112 | ESCC | CHCAMS | Female | 63 | 1601.0 | 10.9 |
| ESCC113 | ESCC | CHCAMS | Male   | 55 | 1181.0 | 8.0  |
| ESCC114 | ESCC | CHCAMS | Male   | 59 | 2729.0 | 18.7 |
| ESCC115 | ESCC | CHCAMS | Female | 49 | 1601.0 | 11.0 |
| ESCC116 | ESCC | CHCAMS | Male   | 59 | 1313.0 | 9.0  |
| ESCC117 | ESCC | CHCAMS | Male   | 70 | 1731.0 | 11.9 |
| ESCC118 | ESCC | CHCAMS | Female | 75 | 1236.0 | 8.5  |
| ESCC119 | ESCC | CHCAMS | Female | 32 | 923.9  | 6.4  |
| ESCC120 | ESCC | CHCAMS | Male   | 56 | 1081.0 | 7.6  |
| ESCC121 | ESCC | CHCAMS | Male   | 31 | 1264.0 | 8.8  |
| ESCC122 | ESCC | CHCAMS | Female | 50 | 1474.0 | 10.4 |
| ESCC123 | ESCC | CHCAMS | Female | 71 | 1156.0 | 8.2  |
| ESCC124 | ESCC | CHCAMS | Male   | 29 | 1459.0 | 10.4 |
| ESCC125 | ESCC | CHCAMS | Female | 28 | 1168.0 | 8.3  |
| ESCC126 | ESCC | CHCAMS | Male   | 73 | 1424.0 | 10.3 |
| ESCC127 | ESCC | CHCAMS | Female | 47 | 1312.1 | 9.5  |
| ESCC128 | ESCC | CHCAMS | Female | 56 | 2431.0 | 17.7 |
| ESCC129 | ESCC | CHCAMS | Male   | 56 | 451.0  | 3.3  |
| ESCC130 | ESCC | CHCAMS | Female | 54 | 1486.9 | 11.0 |
| ESCC131 | ESCC | CHCAMS | Female | 58 | 914.0  | 6.9  |
| ESCC132 | ESCC | CHCAMS | Male   | 63 | 1433.0 | 11.1 |
| ESCC133 | ESCC | CHCAMS | Female | 71 | 1314.0 | 10.2 |
| ESCC134 | ESCC | CHCAMS | Male   | 61 | 2188.1 | 17.0 |
| ESCC135 | ESCC | CHCAMS | Male   | 36 | 1299.0 | 10.2 |
| ESCC136 | ESCC | CHCAMS | Female | 50 | 1984.9 | 15.6 |
| ESCC137 | ESCC | CHCAMS | Female | 49 | 2071.0 | 16.6 |

|         |      |        |        |    |        |      |
|---------|------|--------|--------|----|--------|------|
| ESCC138 | ESCC | CHCAMS | Female | 40 | 1428.0 | 11.4 |
| ESCC139 | ESCC | CHCAMS | Female | 68 | 1314.1 | 10.5 |
| ESCC140 | ESCC | CHCAMS | Male   | 38 | 1128.0 | 9.1  |
| ESCC141 | ESCC | CHCAMS | Female | 70 | 947.0  | 7.7  |
| ESCC142 | ESCC | CHCAMS | Male   | 28 | 1177.0 | 9.7  |
| ESCC143 | ESCC | CHCAMS | Female | 38 | 1398.0 | 11.7 |
| ESCC144 | ESCC | CHCAMS | Female | 42 | 1338.0 | 11.3 |
| ESCC145 | ESCC | CHCAMS | Female | 74 | 1181.0 | 10.1 |
| ESCC146 | ESCC | CHCAMS | Female | 60 | 1656.0 | 14.2 |
| ESCC147 | ESCC | CHCAMS | Male   | 48 | 1485.0 | 12.7 |
| ESCC148 | ESCC | CHCAMS | Male   | 54 | 819.0  | 7.1  |
| ESCC149 | ESCC | CHCAMS | Male   | 34 | 1087.0 | 9.4  |
| ESCC150 | ESCC | CHCAMS | Male   | 35 | 1353.0 | 11.7 |
| ESCC151 | ESCC | CHCAMS | Female | 67 | 1254.0 | 10.9 |
| ESCC152 | ESCC | CHCAMS | Female | 59 | 1678.9 | 14.6 |
| ESCC153 | ESCC | CHCAMS | Female | 55 | 1188.9 | 10.4 |
| ESCC154 | ESCC | CHCAMS | Male   | 28 | 1808.0 | 15.8 |
| ESCC155 | ESCC | CHCAMS | Male   | 26 | 917.0  | 8.0  |
| ESCC156 | ESCC | CHCAMS | Female | 48 | 1069.0 | 9.4  |
| ESCC157 | ESCC | CHCAMS | Male   | 38 | 1269.0 | 11.2 |
| ESCC158 | ESCC | CHCAMS | Male   | 39 | 1300.0 | 11.5 |
| ESCC159 | ESCC | CHCAMS | Female | 62 | 1468.0 | 13.3 |
| ESCC160 | ESCC | CHCAMS | Female | 45 | 1293.0 | 11.8 |
| ESCC161 | ESCC | CHCAMS | Female | 37 | 892.9  | 8.2  |
| ESCC162 | ESCC | CHCAMS | Female | 37 | 1177.1 | 10.8 |
| ESCC163 | ESCC | CHCAMS | Female | 48 | 336.0  | 3.1  |
| ESCC164 | ESCC | CHCAMS | Male   | 62 | 1914.9 | 17.7 |
| ESCC165 | ESCC | CHCAMS | Female | 74 | 823.0  | 7.6  |
| ESCC166 | ESCC | CHCAMS | Male   | 48 | 1450.1 | 13.5 |
| ESCC167 | ESCC | CHCAMS | Male   | 62 | 1457.0 | 13.7 |
| ESCC168 | ESCC | CHCAMS | Male   | 32 | 1182.0 | 11.1 |
| ESCC169 | ESCC | CHCAMS | Male   | 60 | 883.0  | 8.3  |
| ESCC170 | ESCC | CHCAMS | Male   | 49 | 1178.0 | 11.2 |
| ESCC171 | ESCC | CHCAMS | Female | 64 | 2321.0 | 22.2 |
| ESCC172 | ESCC | CHCAMS | Female | 42 | 1610.0 | 15.4 |
| ESCC173 | ESCC | CHCAMS | Male   | 33 | 1349.0 | 12.9 |
| ESCC174 | ESCC | CHCAMS | Male   | 64 | 1369.1 | 13.2 |
| ESCC175 | ESCC | CHCAMS | Male   | 35 | 1097.0 | 10.8 |
| ESCC176 | ESCC | CHCAMS | Male   | 61 | 2241.0 | 22.1 |
| ESCC177 | ESCC | CHCAMS | Female | 54 | 1268.0 | 12.6 |
| ESCC178 | ESCC | CHCAMS | Female | 39 | 1261.1 | 12.6 |
| ESCC179 | ESCC | CHCAMS | Female | 67 | 1072.0 | 10.8 |
| ESCC180 | ESCC | CHCAMS | Female | 72 | 1797.0 | 18.3 |
| ESCC181 | ESCC | CHCAMS | Female | 30 | 1055.0 | 10.8 |

|         |      |        |        |    |        |      |
|---------|------|--------|--------|----|--------|------|
| ESCC182 | ESCC | CHCAMS | Male   | 58 | 1258.0 | 12.9 |
| ESCC183 | ESCC | CHCAMS | Male   | 63 | 1083.9 | 11.1 |
| ESCC184 | ESCC | CHCAMS | Male   | 43 | 1200.0 | 12.3 |
| ESCC185 | ESCC | CHCAMS | Male   | 42 | 1078.0 | 11.1 |
| ESCC186 | ESCC | CHCAMS | Male   | 32 | 1374.0 | 14.2 |
| ESCC187 | ESCC | CHCAMS | Female | 43 | 1097.0 | 11.4 |
| ESCC188 | ESCC | CHCAMS | Female | 26 | 943.0  | 9.9  |
| ESCC189 | ESCC | CHCAMS | Male   | 25 | 1071.0 | 11.3 |
| ESCC190 | ESCC | CHCAMS | Female | 31 | 953.0  | 10.0 |
| ESCC191 | ESCC | CHCAMS | Female | 59 | 1311.0 | 13.9 |
| ESCC192 | ESCC | CHCAMS | Female | 43 | 1410.0 | 15.0 |
| ESCC193 | ESCC | CHCAMS | Male   | 30 | 1078.0 | 11.7 |
| ESCC194 | ESCC | CHCAMS | Female | 40 | 955.0  | 10.4 |
| ESCC195 | ESCC | CHCAMS | Female | 58 | 1221.0 | 13.3 |
| ESCC196 | ESCC | CHCAMS | Male   | 53 | 1256.0 | 13.8 |
| ESCC197 | ESCC | CHCAMS | Female | 37 | 1144.0 | 12.7 |
| ESCC198 | ESCC | CHCAMS | Male   | 64 | 2254.0 | 25.1 |
| ESCC199 | ESCC | CHCAMS | Male   | 34 | 1277.0 | 14.5 |
| ESCC200 | ESCC | CHCAMS | Male   | 26 | 1855.9 | 21.3 |
| ESCC201 | ESCC | CHCAMS | Female | 53 | 1088.0 | 12.6 |
| ESCC202 | ESCC | CHCAMS | Male   | 62 | 1105.0 | 12.9 |
| ESCC203 | ESCC | CHCAMS | Male   | 46 | 1337.0 | 15.9 |
| ESCC204 | ESCC | CHCAMS | Female | 69 | 1293.9 | 15.5 |
| ESCC205 | ESCC | CHCAMS | Female | 32 | 1216.9 | 14.7 |
| ESCC206 | ESCC | CHCAMS | Male   | 30 | 1131.0 | 13.7 |
| ESCC207 | ESCC | CHCAMS | Female | 67 | 1732.0 | 21.2 |
| ESCC208 | ESCC | CHCAMS | Male   | 27 | 507.0  | 6.2  |
| ESCC209 | ESCC | CHCAMS | Male   | 69 | 602.0  | 7.5  |
| ESCC210 | ESCC | CHCAMS | Female | 63 | 1450.0 | 18.1 |
| ESCC211 | ESCC | CHCAMS | Male   | 46 | 1363.0 | 17.1 |
| ESCC212 | ESCC | CHCAMS | Male   | 68 | 1391.0 | 17.5 |
| ESCC213 | ESCC | CHCAMS | Male   | 47 | 1214.0 | 15.3 |
| ESCC214 | ESCC | CHCAMS | Female | 59 | 2314.0 | 29.4 |
| ESCC215 | ESCC | CHCAMS | Male   | 26 | 1593.9 | 20.3 |
| ESCC216 | ESCC | CHCAMS | Female | 32 | 938.9  | 12.1 |
| ESCC217 | ESCC | CHCAMS | Male   | 61 | 1206.0 | 15.7 |
| ESCC218 | ESCC | CHCAMS | Male   | 60 | 1198.0 | 15.8 |
| ESCC219 | ESCC | CHCAMS | Female | 74 | 1441.0 | 19.0 |
| ESCC220 | ESCC | CHCAMS | Female | 27 | 1687.0 | 22.4 |
| ESCC221 | ESCC | CHCAMS | Male   | 25 | 1055.0 | 14.1 |
| ESCC222 | ESCC | CHCAMS | Female | 28 | 1240.0 | 16.8 |
| ESCC223 | ESCC | CHCAMS | Male   | 52 | 1352.0 | 18.3 |
| ESCC224 | ESCC | CHCAMS | Male   | 63 | 331.0  | 4.6  |
| ESCC225 | ESCC | CHCAMS | Male   | 55 | 910.0  | 13.1 |

|         |      |        |        |    |        |      |
|---------|------|--------|--------|----|--------|------|
| ESCC226 | ESCC | CHCAMS | Female | 45 | 650.0  | 9.4  |
| ESCC227 | ESCC | CHCAMS | Male   | 71 | 645.9  | 9.3  |
| ESCC228 | ESCC | CHCAMS | Female | 50 | 878.9  | 12.8 |
| ESCC229 | ESCC | CHCAMS | Female | 33 | 935.1  | 13.7 |
| ESCC230 | ESCC | CHCAMS | Male   | 30 | 1158.0 | 17.1 |
| ESCC231 | ESCC | CHCAMS | Female | 73 | 1141.0 | 16.9 |
| ESCC232 | ESCC | CHCAMS | Male   | 72 | 847.0  | 12.6 |
| ESCC233 | ESCC | CHCAMS | Female | 59 | 1369.0 | 20.6 |
| ESCC234 | ESCC | CHCAMS | Female | 72 | 1426.0 | 21.5 |
| ESCC235 | ESCC | CHCAMS | Female | 37 | 239.0  | 3.6  |
| ESCC236 | ESCC | CHCAMS | Male   | 47 | 845.0  | 13.1 |
| ESCC237 | ESCC | CHCAMS | Male   | 38 | 826.0  | 12.9 |
| ESCC238 | ESCC | CHCAMS | Female | 25 | 1036.0 | 16.5 |
| ESCC239 | ESCC | CHCAMS | Female | 70 | 922.0  | 14.8 |
| ESCC240 | ESCC | CHCAMS | Male   | 41 | 594.0  | 9.7  |
| ESCC241 | ESCC | CHCAMS | Female | 50 | 1392.0 | 23.3 |
| ESCC242 | ESCC | CHCAMS | Male   | 29 | 1469.0 | 24.6 |
| ESCC243 | ESCC | CHCAMS | Female | 66 | 1256.0 | 21.2 |
| ESCC244 | ESCC | CHCAMS | Male   | 69 | 1241.0 | 20.9 |
| ESCC245 | ESCC | CHCAMS | Male   | 32 | 1046.0 | 17.7 |
| ESCC246 | ESCC | CHCAMS | Female | 38 | 631.0  | 10.7 |
| ESCC247 | ESCC | CHCAMS | Female | 58 | 1127.0 | 19.2 |
| ESCC248 | ESCC | CHCAMS | Male   | 67 | 1130.0 | 19.5 |
| ESCC249 | ESCC | CHCAMS | Female | 46 | 1173.0 | 20.5 |
| ESCC250 | ESCC | CHCAMS | Female | 74 | 835.0  | 15.6 |
| ESCC251 | ESCC | CHCAMS | Male   | 70 | 1090.0 | 20.5 |
| ESCC252 | ESCC | CHCAMS | Male   | 55 | 821.0  | 15.9 |
| ESCC253 | ESCC | CHCAMS | Female | 35 | 1077.0 | 21.1 |
| ESCC254 | ESCC | CHCAMS | Female | 54 | 655.0  | 12.8 |
| ESCC255 | ESCC | CHCAMS | Male   | 46 | 664.0  | 13.1 |
| ESCC256 | ESCC | CHCAMS | Male   | 35 | 530.0  | 10.4 |
| ESCC257 | ESCC | CHCAMS | Female | 37 | 1344.0 | 26.9 |
| ESCC258 | ESCC | CHCAMS | Female | 27 | 361.0  | 7.4  |
| ESCC259 | ESCC | CHCAMS | Male   | 57 | 1088.0 | 23.4 |
| ESCC260 | ESCC | CHCAMS | Male   | 56 | 1050.0 | 23.1 |
| ESCC261 | ESCC | CHCAMS | Male   | 44 | 1061.0 | 24.1 |
| ESCC262 | ESCC | CHCAMS | Female | 65 | 457.0  | 10.4 |
| ESCC263 | ESCC | CHCAMS | Female | 65 | 833.0  | 19.3 |
| ESCC264 | ESCC | CHCAMS | Male   | 46 | 647.0  | 15.7 |
| ESCC265 | ESCC | CHCAMS | Female | 49 | 491.9  | 12.1 |
| ESCC266 | ESCC | CHCAMS | Female | 26 | 1557.9 | 38.4 |
| ESCC267 | ESCC | CHCAMS | Female | 48 | 124.6  | 3.2  |
| ESCC268 | ESCC | CHCAMS | Female | 55 | 859.0  | 22.9 |
| ESCC269 | ESCC | CHCAMS | Female | 44 | 285.0  | 7.8  |

|         |      |        |        |    |       |      |
|---------|------|--------|--------|----|-------|------|
| ESCC270 | ESCC | CHCAMS | Female | 47 | 667.0 | 24.8 |
| ESCC271 | ESCC | CHCAMS | Male   | 45 | 330.0 | 14.2 |
| ESCC272 | ESCC | CHCAMS | Male   | 65 | 545.0 | 27.6 |
| ESCC273 | ESCC | CHCAMS | Female | 29 | 296.0 | 18.4 |
| ESCC274 | ESCC | CHCAMS | Male   | 70 | 194.0 | 13.1 |
| ESCC275 | ESCC | CHCAMS | Male   | 54 | 307.0 | 21.7 |
| ESCC276 | ESCC | CHCAMS | Male   | 44 | 152.9 | 7.1  |
| GCC1    | GCC  | CHCAMS | Male   | 28 | 120.2 | 9.2  |
| GCC2    | GCC  | CHCAMS | Male   | 27 | 153.6 | 3.2  |
| GCC3    | GCC  | CHCAMS | Female | 74 | 152.5 | 9.6  |
| GCC4    | GCC  | CHCAMS | Male   | 62 | 166.7 | 1.9  |
| GCC5    | GCC  | CHCAMS | Male   | 27 | 189   | 8.6  |
| GCC6    | GCC  | CHCAMS | Female | 72 | 226.3 | 13.9 |
| GCC7    | GCC  | CHCAMS | Female | 73 | 212.9 | 10.9 |
| GCC8    | GCC  | CHCAMS | Female | 30 | 212   | 11.5 |
| GCC9    | GCC  | CHCAMS | Female | 69 | 215.5 | 6.8  |
| GCC10   | GCC  | CHCAMS | Male   | 65 | 219.1 | 12.0 |
| GCC11   | GCC  | CHCAMS | Female | 55 | 227.3 | 1.7  |
| GCC12   | GCC  | CHCAMS | Female | 53 | 232.4 | 6.0  |
| GCC13   | GCC  | CHCAMS | Male   | 59 | 226   | 13.2 |
| GCC14   | GCC  | CHCAMS | Female | 62 | 232.5 | 3.1  |
| GCC15   | GCC  | CHCAMS | Male   | 62 | 263.4 | 2.4  |
| GCC16   | GCC  | CHCAMS | Female | 63 | 271.9 | 5.5  |
| GCC17   | GCC  | CHCAMS | Male   | 68 | 285.3 | 8.8  |
| GCC18   | GCC  | CHCAMS | Male   | 41 | 311.9 | 15.0 |
| GCC19   | GCC  | CHCAMS | Female | 44 | 297.6 | 0.9  |
| GCC20   | GCC  | CHCAMS | Female | 74 | 339.1 | 12.0 |
| GCC21   | GCC  | CHCAMS | Male   | 69 | 384.9 | 29.4 |
| GCC22   | GCC  | CHCAMS | Male   | 47 | 372   | 4.8  |
| GCC23   | GCC  | CHCAMS | Male   | 35 | 392.9 | 14.7 |
| GCC24   | GCC  | CHCAMS | Female | 55 | 534.3 | 7.7  |
| GCC25   | GCC  | CHCAMS | Male   | 53 | 561.9 | 18.4 |
| GCC26   | GCC  | CHCAMS | Male   | 73 | 547.8 | 18.1 |
| GCC27   | GCC  | CHCAMS | Male   | 36 | 556.4 | 1.0  |
| GCC28   | GCC  | CHCAMS | Female | 39 | 569   | 5.3  |
| GCC29   | GCC  | CHCAMS | Female | 75 | 574.7 | 6.0  |
| GCC30   | GCC  | CHCAMS | Male   | 70 | 571.2 | 13.7 |
| GCC31   | GCC  | CHCAMS | Female | 69 | 594.7 | 6.0  |
| GCC32   | GCC  | CHCAMS | Male   | 66 | 599.5 | 7.9  |
| GCC33   | GCC  | CHCAMS | Male   | 39 | 302.8 | 5.6  |
| GCC34   | GCC  | CHCAMS | Female | 44 | 318.4 | 3.6  |
| GCC35   | GCC  | CHCAMS | Female | 54 | 320.1 | 6.0  |
| GCC36   | GCC  | CHCAMS | Female | 27 | 319.1 | 7.3  |
| GCC37   | GCC  | CHCAMS | Female | 72 | 333.8 | 8.7  |

|       |     |        |        |    |       |      |
|-------|-----|--------|--------|----|-------|------|
| GCC38 | GCC | CHCAMS | Male   | 74 | 436   | 9.9  |
| GCC39 | GCC | CHCAMS | Female | 51 | 441.5 | 12.4 |
| GCC40 | GCC | CHCAMS | Female | 54 | 462.7 | 31.2 |
| GCC41 | GCC | CHCAMS | Female | 30 | 459   | 5.5  |
| GCC42 | GCC | CHCAMS | Female | 53 | 649.4 | 28.5 |
| GCC43 | GCC | CHCAMS | Male   | 60 | 665.6 | 5.1  |
| GCC44 | GCC | CHCAMS | Male   | 31 | 667.3 | 5.9  |
| GCC45 | GCC | CHCAMS | Male   | 54 | 670.5 | 9.5  |
| GCC46 | GCC | CHCAMS | Male   | 59 | 452.8 | 7.2  |
| GCC47 | GCC | CHCAMS | Female | 66 | 455.8 | 6.4  |
| GCC48 | GCC | CHCAMS | Female | 42 | 463.8 | 1.0  |
| GCC49 | GCC | CHCAMS | Female | 61 | 469.3 | 7.4  |
| GCC50 | GCC | CHCAMS | Female | 70 | 701.4 | 11.3 |
| GCC51 | GCC | CHCAMS | Male   | 72 | 694.4 | 11.7 |
| GCC52 | GCC | CHCAMS | Male   | 34 | 698   | 7.3  |
| GCC53 | GCC | CHCAMS | Female | 47 | 709.6 | 8.1  |
| GCC54 | GCC | CHCAMS | Male   | 42 | 502.4 | 7.7  |
| GCC55 | GCC | CHCAMS | Female | 27 | 509.7 | 2.6  |
| GCC56 | GCC | CHCAMS | Male   | 49 | 512.8 | 3.9  |
| GCC57 | GCC | CHCAMS | Female | 32 | 509.8 | 4.8  |
| GCC58 | GCC | CHCAMS | Male   | 55 | 515   | 13.6 |
| GCC59 | GCC | CHCAMS | Male   | 35 | 518.5 | 20.8 |
| GCC60 | GCC | CHCAMS | Female | 38 | 746   | 5.5  |
| GCC61 | GCC | CHCAMS | Female | 36 | 738.8 | 18.5 |
| GCC62 | GCC | CHCAMS | Female | 63 | 751.3 | 3.3  |
| GCC63 | GCC | CHCAMS | Male   | 65 | 752   | 6.3  |
| GCC64 | GCC | CHCAMS | Male   | 29 | 764.1 | 7.0  |
| GCC65 | GCC | CHCAMS | Female | 33 | 759.5 | 4.9  |
| GCC66 | GCC | CHCAMS | Female | 66 | 766.5 | 4.1  |
| GCC67 | GCC | CHCAMS | Female | 28 | 766.7 | 0.9  |
| GCC68 | GCC | CHCAMS | Female | 36 | 769.2 | 2.4  |
| GCC69 | GCC | CHCAMS | Female | 75 | 772.7 | 12.7 |
| GCC70 | GCC | CHCAMS | Female | 58 | 784   | 3.9  |
| GCC71 | GCC | CHCAMS | Male   | 50 | 786.3 | 19.2 |
| GCC72 | GCC | CHCAMS | Male   | 73 | 791.2 | 7.3  |
| GCC73 | GCC | CHCAMS | Male   | 49 | 790.9 | 8.1  |
| GCC74 | GCC | CHCAMS | Female | 53 | 801.4 | 8.0  |
| GCC75 | GCC | CHCAMS | Female | 69 | 799.5 | 3.1  |
| GCC76 | GCC | CHCAMS | Male   | 66 | 806.2 | 6.3  |
| GCC77 | GCC | CHCAMS | Male   | 41 | 835   | 7.1  |
| GCC78 | GCC | CHCAMS | Male   | 73 | 851.4 | 5.2  |
| GCC79 | GCC | CHCAMS | Female | 41 | 859.8 | 22.4 |
| GCC80 | GCC | CHCAMS | Male   | 73 | 852.8 | 2.3  |
| GCC81 | GCC | CHCAMS | Female | 51 | 857.8 | 7.8  |



|        |     |        |        |    |        |      |
|--------|-----|--------|--------|----|--------|------|
| GCC82  | GCC | CHCAMS | Male   | 39 | 849.1  | 6.2  |
| GCC83  | GCC | CHCAMS | Female | 32 | 860.8  | 12.3 |
| GCC84  | GCC | CHCAMS | Female | 49 | 866.2  | 9.2  |
| GCC85  | GCC | CHCAMS | Female | 44 | 869.3  | 4.4  |
| GCC86  | GCC | CHCAMS | Male   | 56 | 871.7  | 8.4  |
| GCC87  | GCC | CHCAMS | Male   | 66 | 886    | 8.9  |
| GCC88  | GCC | CHCAMS | Male   | 29 | 882.2  | 9.0  |
| GCC89  | GCC | CHCAMS | Male   | 67 | 890.1  | 18.0 |
| GCC90  | GCC | CHCAMS | Female | 68 | 893.6  | 15.7 |
| GCC91  | GCC | CHCAMS | Female | 56 | 926.3  | 15.7 |
| GCC92  | GCC | CHCAMS | Male   | 37 | 923.2  | 15.8 |
| GCC93  | GCC | CHCAMS | Male   | 36 | 913.8  | 6.1  |
| GCC94  | GCC | CHCAMS | Male   | 54 | 914.4  | 14.2 |
| GCC95  | GCC | CHCAMS | Female | 73 | 931.1  | 5.7  |
| GCC96  | GCC | CHCAMS | Male   | 39 | 932.2  | 1.2  |
| GCC97  | GCC | CHCAMS | Female | 28 | 940.4  | 11.4 |
| GCC98  | GCC | CHCAMS | Male   | 42 | 942.2  | 2.8  |
| GCC99  | GCC | CHCAMS | Male   | 75 | 952.2  | 13.7 |
| GCC100 | GCC | CHCAMS | Male   | 43 | 944.9  | 6.2  |
| GCC101 | GCC | CHCAMS | Male   | 36 | 955.4  | 3.3  |
| GCC102 | GCC | CHCAMS | Female | 74 | 953.6  | 7.7  |
| GCC103 | GCC | CHCAMS | Male   | 74 | 963.1  | 5.2  |
| GCC104 | GCC | CHCAMS | Male   | 31 | 971.5  | 8.1  |
| GCC105 | GCC | CHCAMS | Male   | 47 | 974.1  | 7.4  |
| GCC106 | GCC | CHCAMS | Male   | 36 | 969.7  | 5.7  |
| GCC107 | GCC | CHCAMS | Male   | 31 | 966.8  | 6.7  |
| GCC108 | GCC | CHCAMS | Male   | 46 | 989    | 6.6  |
| GCC109 | GCC | CHCAMS | Male   | 59 | 994.3  | 7.6  |
| GCC110 | GCC | CHCAMS | Male   | 73 | 990    | 4.4  |
| GCC111 | GCC | CHCAMS | Female | 50 | 993    | 9.7  |
| GCC112 | GCC | CHCAMS | Male   | 60 | 1024.8 | 12.3 |
| GCC113 | GCC | CHCAMS | Male   | 68 | 1029   | 9.3  |
| GCC114 | GCC | CHCAMS | Female | 32 | 1023.4 | 2.5  |
| GCC115 | GCC | CHCAMS | Female | 72 | 1036   | 9.1  |
| GCC116 | GCC | CHCAMS | Male   | 63 | 1038.4 | 2.1  |
| GCC117 | GCC | CHCAMS | Male   | 48 | 1040.4 | 4.9  |
| GCC118 | GCC | CHCAMS | Male   | 31 | 1032.5 | 15.7 |
| GCC119 | GCC | CHCAMS | Male   | 67 | 1043   | 6.9  |
| GCC120 | GCC | CHCAMS | Male   | 60 | 1060.4 | 23.5 |
| GCC121 | GCC | CHCAMS | Male   | 53 | 1036.5 | 14.4 |
| GCC122 | GCC | CHCAMS | Male   | 41 | 1053   | 19.7 |
| GCC123 | GCC | CHCAMS | Male   | 72 | 1058   | 6.2  |
| GCC124 | GCC | CHCAMS | Male   | 72 | 1056.4 | 7.7  |
| GCC125 | GCC | CHCAMS | Male   | 26 | 1058.3 | 8.6  |

|        |     |        |        |    |        |      |
|--------|-----|--------|--------|----|--------|------|
| GCC126 | GCC | CHCAMS | Male   | 42 | 1078.1 | 19.2 |
| GCC127 | GCC | CHCAMS | Female | 68 | 1076.9 | 7.7  |
| GCC128 | GCC | CHCAMS | Female | 36 | 1074.4 | 5.1  |
| GCC129 | GCC | CHCAMS | Female | 70 | 1080.4 | 5.8  |
| GCC130 | GCC | CHCAMS | Male   | 72 | 1079.4 | 11.7 |
| GCC131 | GCC | CHCAMS | Male   | 64 | 1098.9 | 29.6 |
| GCC132 | GCC | CHCAMS | Male   | 34 | 1094.1 | 9.8  |
| GCC133 | GCC | CHCAMS | Female | 73 | 1100.2 | 4.7  |
| GCC134 | GCC | CHCAMS | Male   | 62 | 1100.2 | 14.4 |
| GCC135 | GCC | CHCAMS | Female | 65 | 1106.6 | 6.5  |
| GCC136 | GCC | CHCAMS | Female | 72 | 1109.7 | 18.1 |
| GCC137 | GCC | CHCAMS | Male   | 62 | 1117.4 | 8.5  |
| GCC138 | GCC | CHCAMS | Male   | 75 | 1115.4 | 4.0  |
| GCC139 | GCC | CHCAMS | Male   | 74 | 1119.4 | 11.9 |
| GCC140 | GCC | CHCAMS | Male   | 35 | 1129.1 | 0.6  |
| GCC141 | GCC | CHCAMS | Male   | 31 | 1126.5 | 19.5 |
| GCC142 | GCC | CHCAMS | Male   | 59 | 1127.5 | 9.3  |
| GCC143 | GCC | CHCAMS | Male   | 30 | 1132.3 | 6.7  |
| GCC144 | GCC | CHCAMS | Female | 62 | 1139.9 | 11.4 |
| GCC145 | GCC | CHCAMS | Female | 66 | 1144.2 | 7.2  |
| GCC146 | GCC | CHCAMS | Female | 72 | 1147   | 6.7  |
| GCC147 | GCC | CHCAMS | Male   | 47 | 1168.1 | 15.7 |
| GCC148 | GCC | CHCAMS | Male   | 62 | 1158.6 | 8.4  |
| GCC149 | GCC | CHCAMS | Male   | 56 | 1160.1 | 14.2 |
| GCC150 | GCC | CHCAMS | Male   | 45 | 1155.1 | 9.8  |
| GCC151 | GCC | CHCAMS | Male   | 53 | 1172.7 | 1.5  |
| GCC152 | GCC | CHCAMS | Male   | 74 | 1175.9 | 29.4 |
| GCC153 | GCC | CHCAMS | Male   | 42 | 1182.3 | 3.7  |
| GCC154 | GCC | CHCAMS | Female | 30 | 1187   | 21.8 |
| GCC155 | GCC | CHCAMS | Female | 74 | 1191.7 | 7.3  |
| GCC156 | GCC | CHCAMS | Male   | 26 | 1192.1 | 2.6  |
| GCC157 | GCC | CHCAMS | Female | 73 | 1194.6 | 4.4  |
| GCC158 | GCC | CHCAMS | Male   | 27 | 1217.7 | 13.2 |
| GCC159 | GCC | CHCAMS | Male   | 37 | 1230.5 | 6.0  |
| GCC160 | GCC | CHCAMS | Female | 58 | 1238.6 | 5.3  |
| GCC161 | GCC | CHCAMS | Female | 32 | 1238.4 | 10.2 |
| GCC162 | GCC | CHCAMS | Male   | 58 | 1233   | 22.6 |
| GCC163 | GCC | CHCAMS | Female | 30 | 1244   | 3.1  |
| GCC164 | GCC | CHCAMS | Male   | 72 | 1263.9 | 14.0 |
| GCC165 | GCC | CHCAMS | Male   | 33 | 1252.1 | 23.9 |
| GCC166 | GCC | CHCAMS | Female | 33 | 1260.3 | 8.0  |
| GCC167 | GCC | CHCAMS | Female | 53 | 1257.4 | 8.0  |
| GCC168 | GCC | CHCAMS | Male   | 40 | 1258.2 | 9.3  |
| GCC169 | GCC | CHCAMS | Male   | 66 | 1263.1 | 5.8  |

|        |     |        |        |    |        |      |
|--------|-----|--------|--------|----|--------|------|
| GCC170 | GCC | CHCAMS | Female | 74 | 1263   | 11.7 |
| GCC171 | GCC | CHCAMS | Male   | 32 | 1263.2 | 13.3 |
| GCC172 | GCC | CHCAMS | Male   | 67 | 1268.7 | 10.9 |
| GCC173 | GCC | CHCAMS | Female | 59 | 1268.6 | 19.2 |
| GCC174 | GCC | CHCAMS | Male   | 41 | 1272.9 | 5.3  |
| GCC175 | GCC | CHCAMS | Male   | 61 | 1286.5 | 17.9 |
| GCC176 | GCC | CHCAMS | Female | 62 | 1283.8 | 3.6  |
| GCC177 | GCC | CHCAMS | Male   | 61 | 1295.8 | 4.6  |
| GCC178 | GCC | CHCAMS | Male   | 32 | 1303.8 | 17.2 |
| GCC179 | GCC | CHCAMS | Female | 31 | 1289.9 | 28.7 |
| GCC180 | GCC | CHCAMS | Female | 33 | 1291.4 | 14.0 |
| GCC181 | GCC | CHCAMS | Female | 29 | 1303.6 | 9.5  |
| GCC182 | GCC | CHCAMS | Female | 65 | 1308.8 | 6.6  |
| GCC183 | GCC | CHCAMS | Female | 71 | 1301.4 | 7.3  |
| GCC184 | GCC | CHCAMS | Male   | 64 | 1303.6 | 4.4  |
| GCC185 | GCC | CHCAMS | Female | 63 | 1319.5 | 23.6 |
| GCC186 | GCC | CHCAMS | Male   | 67 | 1340.8 | 15.2 |
| GCC187 | GCC | CHCAMS | Male   | 58 | 1327.9 | 8.1  |
| GCC188 | GCC | CHCAMS | Male   | 37 | 1327.5 | 11.9 |
| GCC189 | GCC | CHCAMS | Female | 40 | 1331.8 | 4.5  |
| GCC190 | GCC | CHCAMS | Female | 32 | 1331.5 | 11.3 |
| GCC191 | GCC | CHCAMS | Female | 61 | 1348   | 16.6 |
| GCC192 | GCC | CHCAMS | Male   | 65 | 1368.3 | 10.0 |
| GCC193 | GCC | CHCAMS | Female | 65 | 1384.8 | 8.6  |
| GCC194 | GCC | CHCAMS | Male   | 43 | 1397.1 | 16.3 |
| GCC195 | GCC | CHCAMS | Female | 39 | 1403.7 | 15.2 |
| GCC196 | GCC | CHCAMS | Male   | 40 | 1401   | 12.0 |
| GCC197 | GCC | CHCAMS | Female | 57 | 1401.5 | 9.0  |
| GCC198 | GCC | CHCAMS | Female | 59 | 1407.5 | 10.2 |
| GCC199 | GCC | CHCAMS | Male   | 69 | 1409.3 | 2.2  |
| GCC200 | GCC | CHCAMS | Female | 45 | 1416.7 | 24.5 |
| GCC201 | GCC | CHCAMS | Male   | 27 | 1411.5 | 16.3 |
| GCC202 | GCC | CHCAMS | Female | 63 | 1420.5 | 8.5  |
| GCC203 | GCC | CHCAMS | Female | 65 | 1422.6 | 4.2  |
| GCC204 | GCC | CHCAMS | Female | 36 | 1426.1 | 3.4  |
| GCC205 | GCC | CHCAMS | Male   | 51 | 1429.8 | 11.4 |
| GCC206 | GCC | CHCAMS | Male   | 56 | 1434.1 | 6.6  |
| GCC207 | GCC | CHCAMS | Male   | 72 | 1425.8 | 20.4 |
| GCC208 | GCC | CHCAMS | Female | 29 | 1449.1 | 12.8 |
| GCC209 | GCC | CHCAMS | Male   | 69 | 1446.5 | 6.0  |
| GCC210 | GCC | CHCAMS | Male   | 73 | 1450   | 7.3  |
| GCC211 | GCC | CHCAMS | Male   | 56 | 1543.8 | 11.6 |
| GCC212 | GCC | CHCAMS | Male   | 30 | 1546.3 | 9.2  |
| GCC213 | GCC | CHCAMS | Female | 58 | 1577.6 | 8.5  |

|        |     |        |        |    |        |      |
|--------|-----|--------|--------|----|--------|------|
| GCC214 | GCC | CHCAMS | Male   | 65 | 1592.2 | 15.0 |
| GCC215 | GCC | CHCAMS | Male   | 71 | 1616.8 | 29.1 |
| GCC216 | GCC | CHCAMS | Male   | 58 | 1623   | 13.2 |
| GCC217 | GCC | CHCAMS | Female | 62 | 1632.8 | 8.1  |
| GCC218 | GCC | CHCAMS | Male   | 57 | 1667.8 | 4.3  |
| GCC219 | GCC | CHCAMS | Male   | 56 | 1682.2 | 6.8  |
| GCC220 | GCC | CHCAMS | Female | 39 | 1715.3 | 16.7 |
| GCC221 | GCC | CHCAMS | Female | 50 | 1739.7 | 13.3 |
| GCC222 | GCC | CHCAMS | Female | 38 | 1780.1 | 13.7 |
| GCC223 | GCC | CHCAMS | Female | 58 | 1773.7 | 14.1 |
| GCC224 | GCC | CHCAMS | Male   | 41 | 1818.1 | 6.8  |
| GCC225 | GCC | CHCAMS | Male   | 56 | 1838.7 | 4.8  |
| GCC226 | GCC | CHCAMS | Male   | 62 | 1869.8 | 10.8 |
| GCC227 | GCC | CHCAMS | Male   | 44 | 1883.5 | 22.1 |
| GCC228 | GCC | CHCAMS | Female | 36 | 1897.1 | 10.8 |
| GCC229 | GCC | CHCAMS | Male   | 55 | 1910.1 | 10.3 |
| GCC230 | GCC | CHCAMS | Female | 40 | 1912.5 | 3.3  |
| GCC231 | GCC | CHCAMS | Male   | 56 | 1934.7 | 7.5  |
| GCC232 | GCC | CHCAMS | Female | 49 | 1949.4 | 7.1  |
| GCC233 | GCC | CHCAMS | Female | 36 | 1955.1 | 11.5 |
| GCC234 | GCC | CHCAMS | Female | 57 | 1985.2 | 16.6 |
| GCC235 | GCC | CHCAMS | Female | 53 | 2013.1 | 1.8  |
| GCC236 | GCC | CHCAMS | Male   | 39 | 2062.9 | 11.6 |
| GCC237 | GCC | CHCAMS | Male   | 40 | 2085.2 | 16.7 |
| GCC238 | GCC | CHCAMS | Male   | 43 | 2139.7 | 12.4 |
| GCC239 | GCC | CHCAMS | Female | 57 | 2156.6 | 29.6 |
| GCC240 | GCC | CHCAMS | Female | 72 | 2158   | 4.1  |
| GCC241 | GCC | CHCAMS | Female | 56 | 2171.6 | 9.1  |
| GCC242 | GCC | CHCAMS | Female | 53 | 2166.6 | 15.1 |
| GCC243 | GCC | CHCAMS | Male   | 61 | 2266.6 | 17.6 |
| GCC244 | GCC | CHCAMS | Female | 48 | 2335.4 | 12.8 |
| GCC245 | GCC | CHCAMS | Male   | 52 | 2335.6 | 14.6 |
| GCC246 | GCC | CHCAMS | Female | 53 | 2425.5 | 9.5  |
| GCC247 | GCC | CHCAMS | Female | 44 | 2433.4 | 13.5 |
| GCC248 | GCC | CHCAMS | Female | 60 | 2771.8 | 5.9  |
| GC1    | GC  | CHCAMS | Male   | 74 | 941.6  | 4.0  |
| GC2    | GC  | CHCAMS | Male   | 27 | 1222.7 | 8.9  |
| GC3    | GC  | CHCAMS | Male   | 75 | 1247   | 11.1 |
| GC4    | GC  | CHCAMS | Female | 68 | 1368.5 | 14.2 |
| GC5    | GC  | CHCAMS | Female | 42 | 692.8  | 14.4 |
| GC6    | GC  | CHCAMS | Male   | 54 | 1010.8 | 3.3  |
| GC7    | GC  | CHCAMS | Male   | 26 | 1055.6 | 6.0  |
| GC8    | GC  | CHCAMS | Female | 49 | 1380.4 | 7.9  |
| GC9    | GC  | CHCAMS | Female | 49 | 1032.8 | 6.2  |

|      |    |        |        |    |        |      |
|------|----|--------|--------|----|--------|------|
| GC10 | GC | CHCAMS | Male   | 29 | 618.1  | 3.9  |
| GC11 | GC | CHCAMS | Female | 31 | 1306.9 | 9.1  |
| GC12 | GC | CHCAMS | Male   | 52 | 1117.7 | 11.2 |
| GC13 | GC | CHCAMS | Male   | 68 | 640.8  | 7.3  |
| GC14 | GC | CHCAMS | Female | 48 | 577.5  | 6.6  |
| GC15 | GC | CHCAMS | Female | 48 | 938.7  | 11.4 |
| GC16 | GC | CHCAMS | Female | 62 | 659.9  | 12.6 |
| GC17 | GC | CHCAMS | Female | 41 | 340.3  | 8.2  |
| GC18 | GC | CHCAMS | Female | 28 | 436.3  | 12.3 |
| GC19 | GC | CHCAMS | Male   | 50 | 641.6  | 20.5 |
| GC20 | GC | CHCAMS | Female | 53 | 150.1  | 7.7  |
| GC21 | GC | CHCAMS | Male   | 47 | 779.7  | 3.1  |
| GC22 | GC | CHCAMS | Female | 74 | 765.8  | 2.9  |
| GC23 | GC | CHCAMS | Male   | 72 | 1831.7 | 9.7  |
| GC24 | GC | CHCAMS | Male   | 28 | 969.1  | 10.7 |
| GC25 | GC | CHCAMS | Female | 45 | 905.6  | 20.6 |
| GC26 | GC | CHCAMS | Female | 50 | 1378.4 | 18.4 |
| GC27 | GC | CHCAMS | Female | 61 | 726.9  | 15.9 |
| GC28 | GC | CHCAMS | Female | 49 | 1052.1 | 3.5  |
| GC29 | GC | CHCAMS | Female | 65 | 1167.7 | 5.2  |
| GC30 | GC | CHCAMS | Female | 38 | 929.9  | 5.2  |
| GC31 | GC | CHCAMS | Male   | 34 | 1448.8 | 8.8  |
| GC32 | GC | CHCAMS | Female | 65 | 1081.2 | 6.9  |
| GC33 | GC | CHCAMS | Female | 61 | 993.1  | 7.9  |
| GC34 | GC | CHCAMS | Female | 73 | 1100.5 | 8.9  |
| GC35 | GC | CHCAMS | Female | 69 | 2372.3 | 21.5 |
| GC36 | GC | CHCAMS | Male   | 67 | 1022.1 | 9.3  |
| GC37 | GC | CHCAMS | Male   | 44 | 848.7  | 8.6  |
| GC38 | GC | CHCAMS | Male   | 60 | 550.9  | 5.8  |
| GC39 | GC | CHCAMS | Male   | 38 | 1080.5 | 13.2 |
| GC40 | GC | CHCAMS | Male   | 49 | 1146.3 | 18.8 |
| GC41 | GC | CHCAMS | Male   | 30 | 413.7  | 7.9  |
| GC42 | GC | CHCAMS | Female | 28 | 828.2  | 16.3 |
| GC43 | GC | CHCAMS | Male   | 71 | 718.3  | 14.3 |
| GC44 | GC | CHCAMS | Female | 54 | 773.6  | 22.9 |
| GC45 | GC | CHCAMS | Female | 70 | 227.8  | 8.7  |
| GC46 | GC | CHCAMS | Male   | 43 | 229.3  | 11.1 |
| GC47 | GC | CHCAMS | Male   | 28 | 197.5  | 9.7  |
| GC48 | GC | CHCAMS | Male   | 32 | 503    | 19.8 |
| GC49 | GC | CHCAMS | Male   | 73 | 881.3  | 5.5  |
| GC50 | GC | CHCAMS | Male   | 62 | 142.9  | 10.2 |
| GC51 | GC | CHCAMS | Male   | 43 | 1229.5 | 11.0 |
| GC52 | GC | CHCAMS | Female | 70 | 925.8  | 6.2  |
| GC53 | GC | CHCAMS | Female | 56 | 592.1  | 4.1  |

|      |    |        |        |    |        |      |
|------|----|--------|--------|----|--------|------|
| GC54 | GC | CHCAMS | Female | 35 | 383.8  | 5.6  |
| GC55 | GC | CHCAMS | Female | 60 | 1758.8 | 6.3  |
| GC56 | GC | CHCAMS | Male   | 68 | 1385.4 | 9.2  |
| GC57 | GC | CHCAMS | Female | 43 | 535.8  | 6.7  |
| GC58 | GC | CHCAMS | Female | 28 | 500.3  | 7.0  |
| GC59 | GC | CHCAMS | Female | 31 | 921.4  | 12.9 |
| GC60 | GC | CHCAMS | Male   | 68 | 1236.9 | 3.1  |
| GC61 | GC | CHCAMS | Male   | 53 | 782.9  | 2.4  |
| GC62 | GC | CHCAMS | Male   | 64 | 930.4  | 3.0  |
| GC63 | GC | CHCAMS | Female | 69 | 1273.1 | 4.6  |
| GC64 | GC | CHCAMS | Male   | 44 | 1003.8 | 3.7  |
| GC65 | GC | CHCAMS | Female | 27 | 1629.1 | 6.6  |
| GC66 | GC | CHCAMS | Female | 58 | 1063.4 | 4.6  |
| GC67 | GC | CHCAMS | Male   | 35 | 1220.2 | 5.3  |
| GC68 | GC | CHCAMS | Male   | 38 | 1525.2 | 7.5  |
| GC69 | GC | CHCAMS | Female | 45 | 1264.3 | 6.5  |
| GC70 | GC | CHCAMS | Female | 41 | 1393.5 | 7.2  |
| GC71 | GC | CHCAMS | Male   | 26 | 968.5  | 5.0  |
| GC72 | GC | CHCAMS | Female | 32 | 1768.6 | 9.1  |
| GC73 | GC | CHCAMS | Female | 34 | 905.8  | 4.7  |
| GC74 | GC | CHCAMS | Male   | 31 | 1255   | 6.7  |
| GC75 | GC | CHCAMS | Female | 34 | 1751.4 | 10.1 |
| GC76 | GC | CHCAMS | Female | 70 | 1317.2 | 7.8  |
| GC77 | GC | CHCAMS | Male   | 47 | 467.3  | 2.8  |
| GC78 | GC | CHCAMS | Male   | 62 | 1271   | 7.8  |
| GC79 | GC | CHCAMS | Male   | 26 | 1530.2 | 9.6  |
| GC80 | GC | CHCAMS | Male   | 51 | 1289.2 | 8.2  |
| GC81 | GC | CHCAMS | Female | 46 | 990.9  | 6.4  |
| GC82 | GC | CHCAMS | Male   | 48 | 1090.7 | 7.6  |
| GC83 | GC | CHCAMS | Male   | 37 | 1389.7 | 9.7  |
| GC84 | GC | CHCAMS | Male   | 36 | 975    | 7.0  |
| GC85 | GC | CHCAMS | Female | 38 | 1111.9 | 8.0  |
| GC86 | GC | CHCAMS | Male   | 47 | 1820.3 | 13.1 |
| GC87 | GC | CHCAMS | Female | 66 | 579.3  | 4.1  |
| GC88 | GC | CHCAMS | Female | 51 | 567.3  | 4.1  |
| GC89 | GC | CHCAMS | Male   | 29 | 1071.3 | 7.9  |
| GC90 | GC | CHCAMS | Female | 59 | 1926.2 | 14.5 |
| GC91 | GC | CHCAMS | Male   | 43 | 826.3  | 6.4  |
| GC92 | GC | CHCAMS | Female | 35 | 740.3  | 5.8  |
| GC93 | GC | CHCAMS | Male   | 37 | 1043.1 | 8.3  |
| GC94 | GC | CHCAMS | Female | 60 | 740.4  | 5.9  |
| GC95 | GC | CHCAMS | Male   | 71 | 907.3  | 7.3  |
| GC96 | GC | CHCAMS | Male   | 60 | 441.9  | 3.5  |
| GC97 | GC | CHCAMS | Male   | 65 | 883.9  | 7.2  |

|       |    |        |        |    |        |      |
|-------|----|--------|--------|----|--------|------|
| GC98  | GC | CHCAMS | Male   | 40 | 871.3  | 7.1  |
| GC99  | GC | CHCAMS | Male   | 67 | 834.6  | 7.0  |
| GC100 | GC | CHCAMS | Male   | 55 | 1326.6 | 11.2 |
| GC101 | GC | CHCAMS | Female | 44 | 1279.1 | 10.9 |
| GC102 | GC | CHCAMS | Female | 36 | 681.1  | 5.8  |
| GC103 | GC | CHCAMS | Male   | 58 | 1921.1 | 16.8 |
| GC104 | GC | CHCAMS | Female | 65 | 1062.2 | 9.4  |
| GC105 | GC | CHCAMS | Female | 69 | 935.8  | 8.4  |
| GC106 | GC | CHCAMS | Male   | 65 | 934.9  | 8.5  |
| GC107 | GC | CHCAMS | Female | 69 | 1195.3 | 10.8 |
| GC108 | GC | CHCAMS | Male   | 36 | 1020.7 | 9.3  |
| GC109 | GC | CHCAMS | Female | 41 | 996.7  | 9.3  |
| GC110 | GC | CHCAMS | Male   | 48 | 1822.3 | 17.0 |
| GC111 | GC | CHCAMS | Female | 51 | 1294.7 | 12.1 |
| GC112 | GC | CHCAMS | Female | 38 | 701.4  | 6.6  |
| GC113 | GC | CHCAMS | Female | 55 | 208.5  | 2.0  |
| GC114 | GC | CHCAMS | Male   | 39 | 854.5  | 8.2  |
| GC115 | GC | CHCAMS | Male   | 38 | 963.1  | 9.2  |
| GC116 | GC | CHCAMS | Male   | 34 | 954.8  | 9.2  |
| GC117 | GC | CHCAMS | Male   | 50 | 867.3  | 8.5  |
| GC118 | GC | CHCAMS | Male   | 27 | 1363.4 | 13.3 |
| GC119 | GC | CHCAMS | Female | 28 | 864.4  | 8.6  |
| GC120 | GC | CHCAMS | Female | 29 | 663.7  | 6.7  |
| GC121 | GC | CHCAMS | Female | 56 | 1076.6 | 10.8 |
| GC122 | GC | CHCAMS | Male   | 69 | 1211.7 | 12.3 |
| GC123 | GC | CHCAMS | Female | 48 | 545.8  | 5.6  |
| GC124 | GC | CHCAMS | Female | 48 | 574.2  | 6.0  |
| GC125 | GC | CHCAMS | Male   | 43 | 818.4  | 8.5  |
| GC126 | GC | CHCAMS | Female | 55 | 1111.3 | 11.6 |
| GC127 | GC | CHCAMS | Male   | 74 | 1736.1 | 18.5 |
| GC128 | GC | CHCAMS | Male   | 30 | 716.8  | 7.6  |
| GC129 | GC | CHCAMS | Male   | 49 | 808.1  | 8.6  |
| GC130 | GC | CHCAMS | Female | 33 | 2393.5 | 25.5 |
| GC131 | GC | CHCAMS | Male   | 35 | 1226.5 | 13.1 |
| GC132 | GC | CHCAMS | Male   | 70 | 1216.1 | 13.0 |
| GC133 | GC | CHCAMS | Female | 62 | 1686.7 | 18.1 |
| GC134 | GC | CHCAMS | Female | 50 | 806.2  | 8.7  |
| GC135 | GC | CHCAMS | Female | 56 | 787.9  | 8.5  |
| GC136 | GC | CHCAMS | Female | 59 | 746.4  | 8.2  |
| GC137 | GC | CHCAMS | Male   | 61 | 1018.3 | 11.3 |
| GC138 | GC | CHCAMS | Female | 66 | 1046.6 | 11.6 |
| GC139 | GC | CHCAMS | Male   | 27 | 1416.1 | 15.8 |
| GC140 | GC | CHCAMS | Male   | 66 | 831.3  | 9.8  |
| GC141 | GC | CHCAMS | Female | 57 | 752.7  | 8.9  |

|       |    |        |        |    |        |      |
|-------|----|--------|--------|----|--------|------|
| GC142 | GC | CHCAMS | Female | 71 | 401.9  | 4.8  |
| GC143 | GC | CHCAMS | Female | 32 | 1506   | 18.0 |
| GC144 | GC | CHCAMS | Female | 35 | 1030.9 | 12.4 |
| GC145 | GC | CHCAMS | Male   | 39 | 490.8  | 6.0  |
| GC146 | GC | CHCAMS | Male   | 29 | 576.4  | 7.2  |
| GC147 | GC | CHCAMS | Male   | 26 | 812.8  | 10.4 |
| GC148 | GC | CHCAMS | Male   | 64 | 631.1  | 8.1  |
| GC149 | GC | CHCAMS | Male   | 43 | 1138.3 | 14.6 |
| GC150 | GC | CHCAMS | Male   | 41 | 508.2  | 6.6  |
| GC151 | GC | CHCAMS | Female | 56 | 1254   | 16.4 |
| GC152 | GC | CHCAMS | Male   | 47 | 980.6  | 12.8 |
| GC153 | GC | CHCAMS | Male   | 42 | 786.3  | 10.4 |
| GC154 | GC | CHCAMS | Male   | 47 | 1532.3 | 20.4 |
| GC155 | GC | CHCAMS | Female | 39 | 608.2  | 8.2  |
| GC156 | GC | CHCAMS | Female | 63 | 887.8  | 11.9 |
| GC157 | GC | CHCAMS | Female | 34 | 1104   | 15.0 |
| GC158 | GC | CHCAMS | Male   | 65 | 1642.4 | 22.5 |
| GC159 | GC | CHCAMS | Female | 74 | 724.8  | 10.1 |
| GC160 | GC | CHCAMS | Male   | 38 | 636.2  | 9.1  |
| GC161 | GC | CHCAMS | Female | 70 | 1286.3 | 18.5 |
| GC162 | GC | CHCAMS | Female | 33 | 1153.7 | 16.7 |
| GC163 | GC | CHCAMS | Female | 57 | 370.2  | 5.4  |
| GC164 | GC | CHCAMS | Male   | 58 | 451.6  | 6.6  |
| GC165 | GC | CHCAMS | Male   | 61 | 921    | 13.7 |
| GC166 | GC | CHCAMS | Male   | 42 | 1488.9 | 22.3 |
| GC167 | GC | CHCAMS | Male   | 55 | 1301.9 | 20.1 |
| GC168 | GC | CHCAMS | Female | 56 | 599.2  | 9.2  |
| GC169 | GC | CHCAMS | Female | 71 | 557.7  | 8.7  |
| GC170 | GC | CHCAMS | Male   | 54 | 1204.6 | 19.1 |
| GC171 | GC | CHCAMS | Female | 59 | 514.1  | 8.2  |
| GC172 | GC | CHCAMS | Male   | 37 | 858.9  | 13.7 |
| GC173 | GC | CHCAMS | Female | 58 | 1189.9 | 19.2 |
| GC174 | GC | CHCAMS | Female | 68 | 704    | 11.7 |
| GC175 | GC | CHCAMS | Female | 26 | 793.2  | 13.3 |
| GC176 | GC | CHCAMS | Male   | 33 | 746.7  | 12.7 |
| GC177 | GC | CHCAMS | Male   | 44 | 1019.5 | 17.9 |
| GC178 | GC | CHCAMS | Male   | 66 | 559.8  | 9.9  |
| GC179 | GC | CHCAMS | Male   | 37 | 1371.5 | 24.4 |
| GC180 | GC | CHCAMS | Male   | 35 | 456    | 8.1  |
| GC181 | GC | CHCAMS | Male   | 38 | 815.9  | 14.7 |
| GC182 | GC | CHCAMS | Female | 58 | 238.2  | 4.3  |
| GC183 | GC | CHCAMS | Male   | 59 | 520.8  | 9.9  |
| GC184 | GC | CHCAMS | Male   | 55 | 522.5  | 10.0 |
| GC185 | GC | CHCAMS | Male   | 36 | 758.7  | 14.7 |



|       |    |        |        |    |       |      |
|-------|----|--------|--------|----|-------|------|
| GC186 | GC | CHCAMS | Male   | 25 | 958.1 | 18.6 |
| GC187 | GC | CHCAMS | Male   | 71 | 505.3 | 9.9  |
| GC188 | GC | CHCAMS | Female | 46 | 340   | 6.7  |
| GC189 | GC | CHCAMS | Male   | 46 | 518.3 | 10.2 |
| GC190 | GC | CHCAMS | Male   | 66 | 482.8 | 9.6  |
| GC191 | GC | CHCAMS | Male   | 31 | 469.3 | 10.0 |
| GC192 | GC | CHCAMS | Male   | 29 | 873.4 | 18.7 |
| GC193 | GC | CHCAMS | Female | 43 | 245.9 | 5.3  |
| GC194 | GC | CHCAMS | Male   | 42 | 376.3 | 8.1  |
| GC195 | GC | CHCAMS | Male   | 63 | 393   | 8.5  |
| GC196 | GC | CHCAMS | Female | 54 | 917.2 | 20.3 |
| GC197 | GC | CHCAMS | Male   | 57 | 816.3 | 18.7 |
| GC198 | GC | CHCAMS | Male   | 41 | 707.2 | 16.3 |
| GC199 | GC | CHCAMS | Male   | 59 | 499.3 | 11.6 |
| GC200 | GC | CHCAMS | Female | 54 | 973.7 | 23.0 |
| GC201 | GC | CHCAMS | Male   | 63 | 591.6 | 14.2 |
| GC202 | GC | CHCAMS | Male   | 30 | 348.4 | 8.9  |
| GC203 | GC | CHCAMS | Female | 56 | 352.8 | 9.0  |
| GC204 | GC | CHCAMS | Female | 51 | 537.1 | 14.0 |
| GC205 | GC | CHCAMS | Female | 70 | 624.2 | 16.8 |
| GC206 | GC | CHCAMS | Male   | 67 | 381.3 | 10.5 |
| GC207 | GC | CHCAMS | Male   | 44 | 406.2 | 11.2 |
| GC208 | GC | CHCAMS | Female | 34 | 516.5 | 14.2 |
| GC209 | GC | CHCAMS | Male   | 52 | 229.2 | 6.4  |
| GC210 | GC | CHCAMS | Male   | 29 | 381.5 | 10.7 |
| GC211 | GC | CHCAMS | Male   | 59 | 500.2 | 14.2 |
| GC212 | GC | CHCAMS | Female | 65 | 602.6 | 17.5 |
| GC213 | GC | CHCAMS | Female | 65 | 545.3 | 16.1 |
| GC214 | GC | CHCAMS | Male   | 36 | 1029  | 30.6 |
| GC215 | GC | CHCAMS | Male   | 57 | 469.5 | 14.1 |
| GC216 | GC | CHCAMS | Male   | 74 | 543.9 | 16.4 |
| GC217 | GC | CHCAMS | Female | 57 | 461.7 | 14.3 |
| GC218 | GC | CHCAMS | Female | 26 | 342.9 | 10.8 |
| GC219 | GC | CHCAMS | Female | 65 | 455.4 | 14.5 |
| GC220 | GC | CHCAMS | Female | 30 | 341.4 | 11.6 |
| GC221 | GC | CHCAMS | Male   | 36 | 415.9 | 14.2 |
| GC222 | GC | CHCAMS | Male   | 39 | 345.3 | 12.3 |
| GC223 | GC | CHCAMS | Male   | 72 | 475.8 | 17.4 |
| GC224 | GC | CHCAMS | Female | 34 | 352.8 | 13.3 |
| GC225 | GC | CHCAMS | Female | 41 | 389.5 | 15.7 |
| GC226 | GC | CHCAMS | Male   | 55 | 588.3 | 23.9 |
| GC227 | GC | CHCAMS | Male   | 68 | 237.4 | 10.3 |
| GC228 | GC | CHCAMS | Female | 47 | 527.7 | 23.3 |
| GC229 | GC | CHCAMS | Male   | 69 | 179.1 | 8.6  |

|        |      |        |        |    |        |      |
|--------|------|--------|--------|----|--------|------|
| GC230  | GC   | CHCAMS | Male   | 46 | 231    | 13.9 |
| GC231  | GC   | CHCAMS | Male   | 66 | 181.6  | 11.6 |
| GC232  | GC   | CHCAMS | Male   | 38 | 247.2  | 7.5  |
| GC233  | GC   | CHCAMS | Female | 45 | 195.5  | 1.9  |
| GC234  | GC   | CHCAMS | Male   | 26 | 165.8  | 1.5  |
| GC235  | GC   | CHCAMS | Female | 69 | 121.9  | 3.5  |
| GC236  | GC   | CHCAMS | Male   | 28 | 110.2  | 3.6  |
| GC237  | GC   | CHCAMS | Male   | 41 | 110.1  | 3.1  |
| GC238  | GC   | CHCAMS | Male   | 49 | 905.3  | 5.7  |
| GC239  | GC   | CHCAMS | Male   | 74 | 1117.1 | 8.3  |
| GC240  | GC   | CHCAMS | Female | 67 | 935.4  | 8.6  |
| GC241  | GC   | CHCAMS | Female | 34 | 912.9  | 9.2  |
| GC242  | GC   | CHCAMS | Male   | 68 | 1024   | 10.4 |
| GC243  | GC   | CHCAMS | Male   | 61 | 511.8  | 8.6  |
| GC244  | GC   | CHCAMS | Male   | 60 | 500.4  | 13.6 |
| GC245  | GC   | CHCAMS | Female | 51 | 632.8  | 17.8 |
| GC246  | GC   | CHCAMS | Male   | 31 | 375.9  | 13.6 |
| GC247  | GC   | CHCAMS | Male   | 69 | 1007.8 | 5.3  |
| GC248  | GC   | CHCAMS | Female | 47 | 684.2  | 11.1 |
| GC249  | GC   | CHCAMS | Male   | 61 | 694.8  | 5.0  |
| GC250  | GC   | CHCAMS | Male   | 72 | 1254.4 | 6.8  |
| GC251  | GC   | CHCAMS | Female | 38 | 1501.4 | 13.5 |
| GC252  | GC   | CHCAMS | Male   | 38 | 551.6  | 10.5 |
| GC253  | GC   | CHCAMS | Male   | 72 | 232.3  | 8.2  |
| GC254  | GC   | CHCAMS | Female | 51 | 1194   | 18.6 |
| GC255  | GC   | CHCAMS | Male   | 71 | 2050   | 5.5  |
| GC256  | GC   | CHCAMS | Female | 28 | 460.2  | 20.4 |
| GC257  | GC   | CHCAMS | Female | 70 | 1145.3 | 5.9  |
| GC258  | GC   | CHCAMS | Female | 49 | 1078   | 6.8  |
| GC259  | GC   | CHCAMS | Female | 58 | 620.8  | 12.2 |
| PDAC1  | PDAC | CHCAMS | Male   | 38 | 63.7   | 3.5  |
| PDAC2  | PDAC | CHCAMS | Male   | 59 | 121.6  | 1.0  |
| PDAC3  | PDAC | CHCAMS | Male   | 67 | 137.1  | 3.1  |
| PDAC4  | PDAC | CHCAMS | Female | 58 | 160.1  | 3.3  |
| PDAC5  | PDAC | CHCAMS | Female | 59 | 161.4  | 3.8  |
| PDAC6  | PDAC | CHCAMS | Female | 35 | 174.1  | 2.5  |
| PDAC7  | PDAC | CHCAMS | Female | 37 | 179    | 6.2  |
| PDAC8  | PDAC | CHCAMS | Female | 60 | 194.4  | 2.4  |
| PDAC9  | PDAC | CHCAMS | Male   | 30 | 197.1  | 2.1  |
| PDAC10 | PDAC | CHCAMS | Male   | 61 | 205.5  | 5.5  |
| PDAC11 | PDAC | CHCAMS | Female | 31 | 215.3  | 7.0  |
| PDAC12 | PDAC | CHCAMS | Female | 35 | 218.1  | 1.3  |
| PDAC13 | PDAC | CHCAMS | Female | 31 | 224.8  | 3.2  |
| PDAC14 | PDAC | CHCAMS | Female | 39 | 240.8  | 2.6  |

|        |      |        |        |    |       |     |
|--------|------|--------|--------|----|-------|-----|
| PDAC15 | PDAC | CHCAMS | Male   | 71 | 258.1 | 3.1 |
| PDAC16 | PDAC | CHCAMS | Female | 65 | 259.5 | 1.4 |
| PDAC17 | PDAC | CHCAMS | Male   | 74 | 264.1 | 2.3 |
| PDAC18 | PDAC | CHCAMS | Male   | 51 | 326.5 | 3.0 |
| PDAC19 | PDAC | CHCAMS | Female | 33 | 329.1 | 4.2 |
| PDAC20 | PDAC | CHCAMS | Female | 44 | 328.9 | 2.2 |
| PDAC21 | PDAC | CHCAMS | Female | 48 | 341.9 | 6.4 |
| PDAC22 | PDAC | CHCAMS | Female | 32 | 343.1 | 2.4 |
| PDAC23 | PDAC | CHCAMS | Female | 36 | 344   | 6.7 |
| PDAC24 | PDAC | CHCAMS | Male   | 32 | 344.6 | 0.5 |
| PDAC25 | PDAC | CHCAMS | Female | 38 | 348   | 2.0 |
| PDAC26 | PDAC | CHCAMS | Male   | 49 | 351.7 | 2.0 |
| PDAC27 | PDAC | CHCAMS | Female | 39 | 354   | 2.3 |
| PDAC28 | PDAC | CHCAMS | Male   | 73 | 360.8 | 3.7 |
| PDAC29 | PDAC | CHCAMS | Female | 29 | 362.2 | 3.7 |
| PDAC30 | PDAC | CHCAMS | Female | 29 | 364.3 | 3.3 |
| PDAC31 | PDAC | CHCAMS | Female | 27 | 364.6 | 2.8 |
| PDAC32 | PDAC | CHCAMS | Female | 69 | 370.8 | 2.4 |
| PDAC33 | PDAC | CHCAMS | Female | 45 | 372.2 | 1.7 |
| PDAC34 | PDAC | CHCAMS | Male   | 37 | 371.1 | 1.0 |
| PDAC35 | PDAC | CHCAMS | Female | 66 | 374.8 | 0.7 |
| PDAC36 | PDAC | CHCAMS | Female | 46 | 377.4 | 2.3 |
| PDAC37 | PDAC | CHCAMS | Female | 31 | 383.8 | 2.4 |
| PDAC38 | PDAC | CHCAMS | Female | 28 | 393.8 | 1.6 |
| PDAC39 | PDAC | CHCAMS | Male   | 42 | 396.5 | 1.9 |
| PDAC40 | PDAC | CHCAMS | Female | 69 | 396.4 | 2.0 |
| PDAC41 | PDAC | CHCAMS | Male   | 72 | 396.4 | 1.6 |
| PDAC42 | PDAC | CHCAMS | Female | 27 | 399   | 1.9 |
| PDAC43 | PDAC | CHCAMS | Female | 74 | 413.4 | 3.2 |
| PDAC44 | PDAC | CHCAMS | Male   | 40 | 415.7 | 1.2 |
| PDAC45 | PDAC | CHCAMS | Female | 54 | 417.1 | 2.8 |
| PDAC46 | PDAC | CHCAMS | Female | 30 | 417.8 | 2.2 |
| PDAC47 | PDAC | CHCAMS | Male   | 31 | 428.7 | 5.0 |
| PDAC48 | PDAC | CHCAMS | Male   | 27 | 429.3 | 2.3 |
| PDAC49 | PDAC | CHCAMS | Female | 60 | 447.8 | 5.4 |
| PDAC50 | PDAC | CHCAMS | Male   | 47 | 456.8 | 2.3 |
| PDAC51 | PDAC | CHCAMS | Male   | 51 | 463.3 | 1.6 |
| PDAC52 | PDAC | CHCAMS | Female | 27 | 462.9 | 2.4 |
| PDAC53 | PDAC | CHCAMS | Female | 72 | 466   | 2.3 |
| PDAC54 | PDAC | CHCAMS | Male   | 44 | 467.2 | 1.5 |
| PDAC55 | PDAC | CHCAMS | Male   | 40 | 473.8 | 1.2 |
| PDAC56 | PDAC | CHCAMS | Female | 73 | 480.7 | 1.8 |
| PDAC57 | PDAC | CHCAMS | Male   | 42 | 494.3 | 3.1 |
| PDAC58 | PDAC | CHCAMS | Male   | 52 | 497.9 | 5.1 |

|         |      |        |        |    |       |      |
|---------|------|--------|--------|----|-------|------|
| PDAC59  | PDAC | CHCAMS | Female | 34 | 496.4 | 2.1  |
| PDAC60  | PDAC | CHCAMS | Male   | 54 | 505.4 | 4.2  |
| PDAC61  | PDAC | CHCAMS | Female | 67 | 502.2 | 2.7  |
| PDAC62  | PDAC | CHCAMS | Male   | 38 | 507.5 | 4.1  |
| PDAC63  | PDAC | CHCAMS | Male   | 61 | 509.7 | 1.7  |
| PDAC64  | PDAC | CHCAMS | Female | 34 | 512.9 | 5.3  |
| PDAC65  | PDAC | CHCAMS | Male   | 72 | 513.4 | 3.0  |
| PDAC66  | PDAC | CHCAMS | Male   | 70 | 522.4 | 2.3  |
| PDAC67  | PDAC | CHCAMS | Male   | 69 | 529.6 | 2.9  |
| PDAC68  | PDAC | CHCAMS | Male   | 29 | 527.9 | 2.3  |
| PDAC69  | PDAC | CHCAMS | Female | 55 | 531.1 | 1.9  |
| PDAC70  | PDAC | CHCAMS | Male   | 37 | 532.7 | 2.6  |
| PDAC71  | PDAC | CHCAMS | Female | 34 | 533.8 | 2.6  |
| PDAC72  | PDAC | CHCAMS | Male   | 67 | 541.6 | 0.6  |
| PDAC73  | PDAC | CHCAMS | Male   | 51 | 542.5 | 0.8  |
| PDAC74  | PDAC | CHCAMS | Male   | 50 | 549.7 | 2.0  |
| PDAC75  | PDAC | CHCAMS | Female | 52 | 556.5 | 2.7  |
| PDAC76  | PDAC | CHCAMS | Female | 35 | 557.1 | 1.9  |
| PDAC77  | PDAC | CHCAMS | Male   | 26 | 563.3 | 3.9  |
| PDAC78  | PDAC | CHCAMS | Male   | 33 | 566.3 | 2.9  |
| PDAC79  | PDAC | CHCAMS | Male   | 55 | 573   | 10.1 |
| PDAC80  | PDAC | CHCAMS | Male   | 38 | 576.5 | 1.9  |
| PDAC81  | PDAC | CHCAMS | Male   | 26 | 579.7 | 1.8  |
| PDAC82  | PDAC | CHCAMS | Male   | 60 | 585.2 | 5.4  |
| PDAC83  | PDAC | CHCAMS | Male   | 43 | 599.1 | 2.5  |
| PDAC84  | PDAC | CHCAMS | Male   | 71 | 603.8 | 4.4  |
| PDAC85  | PDAC | CHCAMS | Male   | 67 | 616   | 1.4  |
| PDAC86  | PDAC | CHCAMS | Male   | 50 | 617.2 | 10.2 |
| PDAC87  | PDAC | CHCAMS | Female | 68 | 618   | 3.9  |
| PDAC88  | PDAC | CHCAMS | Female | 42 | 621.7 | 1.4  |
| PDAC89  | PDAC | CHCAMS | Male   | 28 | 623.5 | 1.9  |
| PDAC90  | PDAC | CHCAMS | Male   | 70 | 625.3 | 4.1  |
| PDAC91  | PDAC | CHCAMS | Female | 48 | 631   | 4.5  |
| PDAC92  | PDAC | CHCAMS | Male   | 67 | 645   | 7.1  |
| PDAC93  | PDAC | CHCAMS | Female | 40 | 640.9 | 2.8  |
| PDAC94  | PDAC | CHCAMS | Female | 73 | 640.3 | 1.8  |
| PDAC95  | PDAC | CHCAMS | Male   | 52 | 643.9 | 2.0  |
| PDAC96  | PDAC | CHCAMS | Male   | 35 | 651.8 | 3.2  |
| PDAC97  | PDAC | CHCAMS | Male   | 70 | 652.7 | 3.5  |
| PDAC98  | PDAC | CHCAMS | Female | 35 | 655.6 | 2.3  |
| PDAC99  | PDAC | CHCAMS | Female | 44 | 664.4 | 2.3  |
| PDAC100 | PDAC | CHCAMS | Female | 27 | 670.3 | 4.6  |
| PDAC101 | PDAC | CHCAMS | Female | 32 | 671.3 | 2.2  |
| PDAC102 | PDAC | CHCAMS | Male   | 55 | 670.3 | 2.1  |

|         |      |        |        |    |       |     |
|---------|------|--------|--------|----|-------|-----|
| PDAC103 | PDAC | CHCAMS | Female | 49 | 677.1 | 5.5 |
| PDAC104 | PDAC | CHCAMS | Female | 74 | 687.2 | 3.0 |
| PDAC105 | PDAC | CHCAMS | Female | 50 | 691.3 | 5.8 |
| PDAC106 | PDAC | CHCAMS | Male   | 56 | 691.9 | 1.3 |
| PDAC107 | PDAC | CHCAMS | Male   | 46 | 695.2 | 4.0 |
| PDAC108 | PDAC | CHCAMS | Male   | 55 | 695.6 | 3.2 |
| PDAC109 | PDAC | CHCAMS | Female | 35 | 702   | 0.4 |
| PDAC110 | PDAC | CHCAMS | Male   | 71 | 702.5 | 2.0 |
| PDAC111 | PDAC | CHCAMS | Male   | 46 | 705.9 | 3.3 |
| PDAC112 | PDAC | CHCAMS | Male   | 38 | 705.5 | 1.6 |
| PDAC113 | PDAC | CHCAMS | Female | 41 | 710.6 | 3.7 |
| PDAC114 | PDAC | CHCAMS | Female | 54 | 711.2 | 2.6 |
| PDAC115 | PDAC | CHCAMS | Female | 36 | 718.2 | 4.1 |
| PDAC116 | PDAC | CHCAMS | Female | 52 | 721.2 | 2.7 |
| PDAC117 | PDAC | CHCAMS | Male   | 53 | 721.6 | 3.1 |
| PDAC118 | PDAC | CHCAMS | Male   | 52 | 730.9 | 3.2 |
| PDAC119 | PDAC | CHCAMS | Male   | 52 | 738.8 | 3.4 |
| PDAC120 | PDAC | CHCAMS | Male   | 60 | 746.9 | 3.3 |
| PDAC121 | PDAC | CHCAMS | Female | 34 | 746.5 | 0.5 |
| PDAC122 | PDAC | CHCAMS | Male   | 26 | 758.7 | 2.3 |
| PDAC123 | PDAC | CHCAMS | Female | 30 | 762.3 | 2.4 |
| PDAC124 | PDAC | CHCAMS | Female | 51 | 768.4 | 3.3 |
| PDAC125 | PDAC | CHCAMS | Male   | 69 | 767.3 | 2.6 |
| PDAC126 | PDAC | CHCAMS | Female | 53 | 779.2 | 2.8 |
| PDAC127 | PDAC | CHCAMS | Male   | 38 | 782.8 | 3.7 |
| PDAC128 | PDAC | CHCAMS | Male   | 62 | 784.7 | 4.6 |
| PDAC129 | PDAC | CHCAMS | Female | 59 | 783.7 | 2.6 |
| PDAC130 | PDAC | CHCAMS | Male   | 68 | 797   | 2.1 |
| PDAC131 | PDAC | CHCAMS | Male   | 58 | 806.9 | 5.2 |
| PDAC132 | PDAC | CHCAMS | Female | 43 | 814   | 4.7 |
| PDAC133 | PDAC | CHCAMS | Female | 49 | 810.4 | 1.9 |
| PDAC134 | PDAC | CHCAMS | Female | 68 | 812.6 | 1.2 |
| PDAC135 | PDAC | CHCAMS | Female | 37 | 825.1 | 1.7 |
| PDAC136 | PDAC | CHCAMS | Male   | 58 | 824   | 0.6 |
| PDAC137 | PDAC | CHCAMS | Female | 29 | 845.3 | 3.1 |
| PDAC138 | PDAC | CHCAMS | Female | 53 | 845.5 | 5.3 |
| PDAC139 | PDAC | CHCAMS | Female | 40 | 847.9 | 2.6 |
| PDAC140 | PDAC | CHCAMS | Male   | 28 | 849.1 | 4.1 |
| PDAC141 | PDAC | CHCAMS | Female | 27 | 848.5 | 1.7 |
| PDAC142 | PDAC | CHCAMS | Male   | 70 | 849.6 | 1.6 |
| PDAC143 | PDAC | CHCAMS | Male   | 36 | 862   | 3.5 |
| PDAC144 | PDAC | CHCAMS | Female | 69 | 874.1 | 3.0 |
| PDAC145 | PDAC | CHCAMS | Female | 28 | 875.4 | 0.8 |
| PDAC146 | PDAC | CHCAMS | Male   | 62 | 880.7 | 5.0 |

|         |      |        |        |    |        |     |
|---------|------|--------|--------|----|--------|-----|
| PDAC147 | PDAC | CHCAMS | Female | 46 | 889.1  | 3.1 |
| PDAC148 | PDAC | CHCAMS | Male   | 43 | 887.8  | 1.0 |
| PDAC149 | PDAC | CHCAMS | Male   | 59 | 899.5  | 9.1 |
| PDAC150 | PDAC | CHCAMS | Female | 53 | 908.4  | 1.4 |
| PDAC151 | PDAC | CHCAMS | Male   | 64 | 914.1  | 3.5 |
| PDAC152 | PDAC | CHCAMS | Female | 68 | 929.3  | 7.5 |
| PDAC153 | PDAC | CHCAMS | Male   | 60 | 924.9  | 3.6 |
| PDAC154 | PDAC | CHCAMS | Female | 74 | 927.1  | 1.6 |
| PDAC155 | PDAC | CHCAMS | Male   | 41 | 926.2  | 1.3 |
| PDAC156 | PDAC | CHCAMS | Female | 72 | 935.2  | 1.8 |
| PDAC157 | PDAC | CHCAMS | Female | 36 | 950.3  | 2.5 |
| PDAC158 | PDAC | CHCAMS | Male   | 64 | 1003.3 | 2.5 |
| PDAC159 | PDAC | CHCAMS | Female | 72 | 1015.2 | 1.4 |
| PDAC160 | PDAC | CHCAMS | Male   | 47 | 1018.8 | 1.3 |
| PDAC161 | PDAC | CHCAMS | Female | 54 | 1021.4 | 3.0 |
| PDAC162 | PDAC | CHCAMS | Female | 34 | 1022.1 | 1.4 |
| PDAC163 | PDAC | CHCAMS | Male   | 40 | 1048.7 | 0.9 |
| PDAC164 | PDAC | CHCAMS | Male   | 60 | 1059.5 | 5.0 |
| PDAC165 | PDAC | CHCAMS | Female | 39 | 1055.2 | 1.8 |
| PDAC166 | PDAC | CHCAMS | Female | 53 | 1069.4 | 2.5 |
| PDAC167 | PDAC | CHCAMS | Female | 51 | 1070.9 | 4.1 |
| PDAC168 | PDAC | CHCAMS | Female | 46 | 1077.9 | 4.7 |
| PDAC169 | PDAC | CHCAMS | Male   | 73 | 1090.2 | 1.8 |
| PDAC170 | PDAC | CHCAMS | Female | 44 | 1094.2 | 1.9 |
| PDAC171 | PDAC | CHCAMS | Male   | 52 | 1100   | 1.7 |
| PDAC172 | PDAC | CHCAMS | Male   | 43 | 1103.8 | 2.6 |
| PDAC173 | PDAC | CHCAMS | Female | 57 | 1112.8 | 1.3 |
| PDAC174 | PDAC | CHCAMS | Female | 36 | 1112.5 | 1.0 |
| PDAC175 | PDAC | CHCAMS | Female | 31 | 1112.9 | 2.7 |
| PDAC176 | PDAC | CHCAMS | Female | 43 | 1119.4 | 5.0 |
| PDAC177 | PDAC | CHCAMS | Male   | 28 | 1121.5 | 2.5 |
| PDAC178 | PDAC | CHCAMS | Female | 70 | 1123.8 | 2.0 |
| PDAC179 | PDAC | CHCAMS | Female | 52 | 1127.9 | 2.2 |
| PDAC180 | PDAC | CHCAMS | Male   | 45 | 1129.7 | 1.4 |
| PDAC181 | PDAC | CHCAMS | Female | 42 | 1135.7 | 1.0 |
| PDAC182 | PDAC | CHCAMS | Female | 56 | 1145.2 | 3.1 |
| PDAC183 | PDAC | CHCAMS | Male   | 26 | 1153.1 | 4.5 |
| PDAC184 | PDAC | CHCAMS | Female | 28 | 1152.4 | 2.2 |
| PDAC185 | PDAC | CHCAMS | Female | 33 | 1153.4 | 6.0 |
| PDAC186 | PDAC | CHCAMS | Female | 44 | 1157   | 2.3 |
| PDAC187 | PDAC | CHCAMS | Male   | 35 | 1158   | 2.1 |
| PDAC188 | PDAC | CHCAMS | Female | 46 | 1167.4 | 2.3 |
| PDAC189 | PDAC | CHCAMS | Female | 54 | 1178.3 | 4.3 |
| PDAC190 | PDAC | CHCAMS | Male   | 36 | 1187   | 1.5 |

|         |      |        |        |    |        |      |
|---------|------|--------|--------|----|--------|------|
| PDAC191 | PDAC | CHCAMS | Male   | 26 | 1190.3 | 1.3  |
| PDAC192 | PDAC | CHCAMS | Male   | 71 | 1200   | 10.5 |
| PDAC193 | PDAC | CHCAMS | Female | 73 | 1204.2 | 3.3  |
| PDAC194 | PDAC | CHCAMS | Male   | 57 | 1204.5 | 3.0  |
| PDAC195 | PDAC | CHCAMS | Female | 48 | 1209.1 | 2.6  |
| PDAC196 | PDAC | CHCAMS | Female | 70 | 1208.9 | 1.8  |
| PDAC197 | PDAC | CHCAMS | Male   | 33 | 1214.2 | 3.2  |
| PDAC198 | PDAC | CHCAMS | Female | 53 | 1217.1 | 2.1  |
| PDAC199 | PDAC | CHCAMS | Female | 35 | 1223.5 | 1.5  |
| PDAC200 | PDAC | CHCAMS | Female | 27 | 1232.5 | 5.7  |
| PDAC201 | PDAC | CHCAMS | Female | 55 | 1236.7 | 4.0  |
| PDAC202 | PDAC | CHCAMS | Female | 30 | 1235.5 | 1.9  |
| PDAC203 | PDAC | CHCAMS | Male   | 40 | 1244.5 | 3.0  |
| PDAC204 | PDAC | CHCAMS | Female | 28 | 1246.2 | 2.7  |
| PDAC205 | PDAC | CHCAMS | Male   | 50 | 1249.1 | 0.7  |
| PDAC206 | PDAC | CHCAMS | Female | 53 | 1250.1 | 2.2  |
| PDAC207 | PDAC | CHCAMS | Male   | 69 | 1259.9 | 1.4  |
| PDAC208 | PDAC | CHCAMS | Male   | 35 | 1266.6 | 1.8  |
| PDAC209 | PDAC | CHCAMS | Male   | 59 | 1275.8 | 1.5  |
| PDAC210 | PDAC | CHCAMS | Male   | 65 | 1277.1 | 2.5  |
| PDAC211 | PDAC | CHCAMS | Female | 72 | 1291.6 | 2.3  |
| PDAC212 | PDAC | CHCAMS | Female | 57 | 1290.3 | 1.5  |
| PDAC213 | PDAC | CHCAMS | Female | 35 | 1308.7 | 1.6  |
| PDAC214 | PDAC | CHCAMS | Male   | 52 | 1321.4 | 1.5  |
| PDAC215 | PDAC | CHCAMS | Male   | 39 | 1324.9 | 4.5  |
| PDAC216 | PDAC | CHCAMS | Female | 52 | 1323.5 | 2.3  |
| PDAC217 | PDAC | CHCAMS | Female | 55 | 1327.1 | 3.5  |
| PDAC218 | PDAC | CHCAMS | Female | 59 | 1330.2 | 1.8  |
| PDAC219 | PDAC | CHCAMS | Female | 66 | 1333.8 | 2.8  |
| PDAC220 | PDAC | CHCAMS | Female | 53 | 1349.8 | 2.6  |
| PDAC221 | PDAC | CHCAMS | Male   | 44 | 1365   | 6.6  |
| PDAC222 | PDAC | CHCAMS | Male   | 37 | 1369.7 | 1.5  |
| PDAC223 | PDAC | CHCAMS | Male   | 46 | 1118.1 | 3.1  |
| PDAC224 | PDAC | CHCAMS | Female | 46 | 1147.3 | 4.8  |
| PDAC225 | PDAC | CHCAMS | Female | 41 | 1065.5 | 1.6  |
| PDAC226 | PDAC | CHCAMS | Female | 65 | 1118.6 | 4.4  |
| PDAC227 | PDAC | CHCAMS | Female | 71 | 1071.5 | 6.4  |
| PDAC228 | PDAC | CHCAMS | Female | 32 | 1179.4 | 1.5  |
| PDAC229 | PDAC | CHCAMS | Male   | 31 | 1218.9 | 1.8  |
| PDAC230 | PDAC | CHCAMS | Female | 59 | 1046.7 | 4.5  |
| PDAC231 | PDAC | CHCAMS | Female | 55 | 1199.6 | 10.7 |
| PDAC232 | PDAC | CHCAMS | Male   | 33 | 1088.1 | 2.6  |
| PDAC233 | PDAC | CHCAMS | Female | 65 | 1168   | 1.9  |
| PDAC234 | PDAC | CHCAMS | Female | 69 | 1404.9 | 2.2  |

|         |      |        |        |    |        |     |
|---------|------|--------|--------|----|--------|-----|
| PDAC235 | PDAC | CHCAMS | Male   | 56 | 1405.9 | 4.3 |
| PDAC236 | PDAC | CHCAMS | Male   | 37 | 1420.7 | 2.5 |
| PDAC237 | PDAC | CHCAMS | Female | 47 | 1426.5 | 3.7 |
| PDAC238 | PDAC | CHCAMS | Female | 40 | 1437.8 | 6.1 |
| PDAC239 | PDAC | CHCAMS | Male   | 36 | 1439.4 | 3.5 |
| PDAC240 | PDAC | CHCAMS | Male   | 46 | 1440.2 | 3.6 |
| PDAC241 | PDAC | CHCAMS | Female | 53 | 1441.7 | 2.7 |
| PDAC242 | PDAC | CHCAMS | Female | 38 | 1457.2 | 5.5 |
| PDAC243 | PDAC | CHCAMS | Male   | 63 | 1506.2 | 2.3 |
| PDAC244 | PDAC | CHCAMS | Female | 69 | 1544.2 | 7.6 |
| PDAC245 | PDAC | CHCAMS | Female | 26 | 1537.3 | 2.8 |
| PDAC246 | PDAC | CHCAMS | Female | 32 | 1546.1 | 1.1 |
| PDAC247 | PDAC | CHCAMS | Male   | 28 | 1557   | 2.4 |
| PDAC248 | PDAC | CHCAMS | Male   | 53 | 1577.3 | 1.1 |
| PDAC249 | PDAC | CHCAMS | Female | 38 | 1641.2 | 3.8 |
| PDAC250 | PDAC | CHCAMS | Male   | 54 | 1679.6 | 1.0 |
| PDAC251 | PDAC | CHCAMS | Female | 47 | 1700.3 | 3.2 |
| PDAC252 | PDAC | CHCAMS | Female | 53 | 1730.2 | 2.2 |
| PDAC253 | PDAC | CHCAMS | Female | 63 | 1742.6 | 3.5 |
| PDAC254 | PDAC | CHCAMS | Female | 47 | 1777   | 1.6 |
| PDAC255 | PDAC | CHCAMS | Male   | 68 | 1854.9 | 2.3 |
| PDAC256 | PDAC | CHCAMS | Female | 28 | 2176   | 1.6 |
| HCC1    | HCC  | CHCAMS | Male   | 29 | 80.4   | 1.2 |
| HCC2    | HCC  | CHCAMS | Male   | 36 | 80.6   | 0.9 |
| HCC3    | HCC  | CHCAMS | Female | 57 | 88.1   | 3.3 |
| HCC4    | HCC  | CHCAMS | Female | 43 | 93.9   | 1.3 |
| HCC5    | HCC  | CHCAMS | Male   | 66 | 122.1  | 8.1 |
| HCC6    | HCC  | CHCAMS | Male   | 65 | 138.6  | 5.2 |
| HCC7    | HCC  | CHCAMS | Male   | 52 | 137.3  | 0.9 |
| HCC8    | HCC  | CHCAMS | Male   | 63 | 213    | 2.5 |
| HCC9    | HCC  | CHCAMS | Female | 72 | 221    | 1.4 |
| HCC10   | HCC  | CHCAMS | Male   | 66 | 226.7  | 1.1 |
| HCC11   | HCC  | CHCAMS | Male   | 74 | 255.4  | 1.2 |
| HCC12   | HCC  | CHCAMS | Male   | 38 | 307.6  | 5.3 |
| HCC13   | HCC  | CHCAMS | Male   | 73 | 317.7  | 2.5 |
| HCC14   | HCC  | CHCAMS | Female | 45 | 328.4  | 6.9 |
| HCC15   | HCC  | CHCAMS | Male   | 63 | 324.4  | 1.7 |
| HCC16   | HCC  | CHCAMS | Male   | 34 | 328.1  | 1.1 |
| HCC17   | HCC  | CHCAMS | Male   | 25 | 329.3  | 4.0 |
| HCC18   | HCC  | CHCAMS | Male   | 60 | 332.5  | 1.4 |
| HCC19   | HCC  | CHCAMS | Male   | 66 | 351.3  | 2.2 |
| HCC20   | HCC  | CHCAMS | Male   | 62 | 366    | 3.9 |
| HCC21   | HCC  | CHCAMS | Male   | 25 | 380    | 1.2 |
| HCC22   | HCC  | CHCAMS | Female | 48 | 388    | 1.7 |



|       |     |        |        |    |       |     |
|-------|-----|--------|--------|----|-------|-----|
| HCC23 | HCC | CHCAMS | Male   | 47 | 392.5 | 2.6 |
| HCC24 | HCC | CHCAMS | Male   | 66 | 399.8 | 1.8 |
| HCC25 | HCC | CHCAMS | Female | 47 | 426.6 | 1.2 |
| HCC26 | HCC | CHCAMS | Male   | 26 | 431.4 | 5.4 |
| HCC27 | HCC | CHCAMS | Female | 31 | 431.3 | 3.8 |
| HCC28 | HCC | CHCAMS | Male   | 55 | 452.8 | 2.1 |
| HCC29 | HCC | CHCAMS | Female | 70 | 452.5 | 2.4 |
| HCC30 | HCC | CHCAMS | Female | 61 | 458   | 3.4 |
| HCC31 | HCC | CHCAMS | Female | 73 | 467.8 | 1.3 |
| HCC32 | HCC | CHCAMS | Male   | 30 | 482.3 | 2.3 |
| HCC33 | HCC | CHCAMS | Male   | 52 | 477.7 | 0.7 |
| HCC34 | HCC | CHCAMS | Male   | 40 | 476.5 | 4.3 |
| HCC35 | HCC | CHCAMS | Female | 26 | 480.2 | 1.4 |
| HCC36 | HCC | CHCAMS | Male   | 61 | 492   | 7.9 |
| HCC37 | HCC | CHCAMS | Female | 44 | 481.4 | 2.8 |
| HCC38 | HCC | CHCAMS | Male   | 63 | 488.2 | 0.5 |
| HCC39 | HCC | CHCAMS | Female | 27 | 491.5 | 2.7 |
| HCC40 | HCC | CHCAMS | Female | 52 | 510.8 | 5.0 |
| HCC41 | HCC | CHCAMS | Female | 73 | 515.6 | 1.2 |
| HCC42 | HCC | CHCAMS | Male   | 27 | 521.4 | 0.6 |
| HCC43 | HCC | CHCAMS | Male   | 64 | 527.9 | 1.2 |
| HCC44 | HCC | CHCAMS | Male   | 74 | 533.9 | 1.5 |
| HCC45 | HCC | CHCAMS | Female | 46 | 551.4 | 5.6 |
| HCC46 | HCC | CHCAMS | Male   | 39 | 546.4 | 1.5 |
| HCC47 | HCC | CHCAMS | Female | 70 | 566.6 | 4.4 |
| HCC48 | HCC | CHCAMS | Male   | 33 | 565.2 | 2.1 |
| HCC49 | HCC | CHCAMS | Male   | 35 | 575.2 | 1.2 |
| HCC50 | HCC | CHCAMS | Male   | 49 | 570.7 | 2.8 |
| HCC51 | HCC | CHCAMS | Male   | 35 | 580.8 | 1.4 |
| HCC52 | HCC | CHCAMS | Male   | 30 | 591.8 | 2.0 |
| HCC53 | HCC | CHCAMS | Female | 43 | 591   | 1.6 |
| HCC54 | HCC | CHCAMS | Female | 32 | 596.4 | 0.6 |
| HCC55 | HCC | CHCAMS | Female | 51 | 618.1 | 1.3 |
| HCC56 | HCC | CHCAMS | Female | 57 | 623.7 | 2.7 |
| HCC57 | HCC | CHCAMS | Female | 41 | 625.3 | 3.5 |
| HCC58 | HCC | CHCAMS | Male   | 66 | 632.7 | 1.4 |
| HCC59 | HCC | CHCAMS | Male   | 73 | 638.3 | 1.8 |
| HCC60 | HCC | CHCAMS | Male   | 50 | 638.6 | 2.2 |
| HCC61 | HCC | CHCAMS | Male   | 26 | 644.1 | 4.5 |
| HCC62 | HCC | CHCAMS | Male   | 57 | 637.2 | 2.5 |
| HCC63 | HCC | CHCAMS | Male   | 68 | 644.5 | 1.4 |
| HCC64 | HCC | CHCAMS | Female | 43 | 642.8 | 2.9 |
| HCC65 | HCC | CHCAMS | Female | 28 | 664.8 | 1.8 |
| HCC66 | HCC | CHCAMS | Male   | 54 | 681.4 | 2.4 |

|        |     |        |        |    |       |     |
|--------|-----|--------|--------|----|-------|-----|
| HCC67  | HCC | CHCAMS | Female | 34 | 679   | 2.3 |
| HCC68  | HCC | CHCAMS | Female | 59 | 688.1 | 2.7 |
| HCC69  | HCC | CHCAMS | Female | 71 | 685.4 | 2.2 |
| HCC70  | HCC | CHCAMS | Female | 42 | 684.5 | 6.3 |
| HCC71  | HCC | CHCAMS | Female | 28 | 697.5 | 1.4 |
| HCC72  | HCC | CHCAMS | Male   | 49 | 701.9 | 1.5 |
| HCC73  | HCC | CHCAMS | Female | 57 | 713.6 | 2.7 |
| HCC74  | HCC | CHCAMS | Female | 36 | 708.3 | 1.6 |
| HCC75  | HCC | CHCAMS | Male   | 62 | 717.9 | 1.0 |
| HCC76  | HCC | CHCAMS | Female | 61 | 734   | 6.2 |
| HCC77  | HCC | CHCAMS | Female | 40 | 732.2 | 6.4 |
| HCC78  | HCC | CHCAMS | Female | 65 | 735.8 | 2.0 |
| HCC79  | HCC | CHCAMS | Male   | 35 | 740.1 | 2.6 |
| HCC80  | HCC | CHCAMS | Female | 33 | 747.6 | 0.5 |
| HCC81  | HCC | CHCAMS | Male   | 33 | 744.8 | 1.3 |
| HCC82  | HCC | CHCAMS | Male   | 31 | 743.2 | 2.7 |
| HCC83  | HCC | CHCAMS | Female | 69 | 757   | 3.3 |
| HCC84  | HCC | CHCAMS | Female | 28 | 759.1 | 2.2 |
| HCC85  | HCC | CHCAMS | Female | 71 | 763.3 | 1.6 |
| HCC86  | HCC | CHCAMS | Female | 71 | 765.8 | 2.1 |
| HCC87  | HCC | CHCAMS | Male   | 29 | 769.3 | 3.2 |
| HCC88  | HCC | CHCAMS | Female | 45 | 765.3 | 1.8 |
| HCC89  | HCC | CHCAMS | Male   | 32 | 763.3 | 1.0 |
| HCC90  | HCC | CHCAMS | Female | 29 | 771.8 | 2.8 |
| HCC91  | HCC | CHCAMS | Female | 73 | 784.5 | 3.8 |
| HCC92  | HCC | CHCAMS | Female | 48 | 781.6 | 2.6 |
| HCC93  | HCC | CHCAMS | Male   | 34 | 800.4 | 5.9 |
| HCC94  | HCC | CHCAMS | Male   | 70 | 802.2 | 4.0 |
| HCC95  | HCC | CHCAMS | Male   | 56 | 790   | 0.6 |
| HCC96  | HCC | CHCAMS | Female | 27 | 798.2 | 3.6 |
| HCC97  | HCC | CHCAMS | Female | 38 | 792.6 | 3.2 |
| HCC98  | HCC | CHCAMS | Female | 41 | 811.1 | 0.9 |
| HCC99  | HCC | CHCAMS | Female | 65 | 819.8 | 1.8 |
| HCC100 | HCC | CHCAMS | Female | 42 | 816.2 | 2.8 |
| HCC101 | HCC | CHCAMS | Female | 55 | 827.2 | 0.5 |
| HCC102 | HCC | CHCAMS | Female | 28 | 834.3 | 1.8 |
| HCC103 | HCC | CHCAMS | Female | 54 | 833.2 | 0.6 |
| HCC104 | HCC | CHCAMS | Female | 42 | 839.5 | 2.8 |
| HCC105 | HCC | CHCAMS | Male   | 68 | 835.9 | 0.9 |
| HCC106 | HCC | CHCAMS | Female | 53 | 837.4 | 4.1 |
| HCC107 | HCC | CHCAMS | Female | 72 | 845   | 2.6 |
| HCC108 | HCC | CHCAMS | Female | 30 | 851.4 | 3.0 |
| HCC109 | HCC | CHCAMS | Male   | 29 | 850.9 | 2.2 |
| HCC110 | HCC | CHCAMS | Male   | 41 | 853.2 | 4.7 |

|        |     |        |        |    |        |     |
|--------|-----|--------|--------|----|--------|-----|
| HCC111 | HCC | CHCAMS | Male   | 28 | 849.9  | 1.0 |
| HCC112 | HCC | CHCAMS | Female | 58 | 853.7  | 1.7 |
| HCC113 | HCC | CHCAMS | Male   | 49 | 856.1  | 3.1 |
| HCC114 | HCC | CHCAMS | Female | 63 | 862.6  | 3.4 |
| HCC115 | HCC | CHCAMS | Female | 25 | 864.9  | 2.9 |
| HCC116 | HCC | CHCAMS | Male   | 65 | 870    | 0.4 |
| HCC117 | HCC | CHCAMS | Male   | 27 | 874.2  | 0.9 |
| HCC118 | HCC | CHCAMS | Female | 56 | 865.8  | 3.5 |
| HCC119 | HCC | CHCAMS | Female | 62 | 879.3  | 5.0 |
| HCC120 | HCC | CHCAMS | Female | 37 | 870.3  | 2.9 |
| HCC121 | HCC | CHCAMS | Female | 38 | 875.4  | 1.3 |
| HCC122 | HCC | CHCAMS | Male   | 29 | 877.5  | 1.2 |
| HCC123 | HCC | CHCAMS | Female | 43 | 879.2  | 1.3 |
| HCC124 | HCC | CHCAMS | Male   | 43 | 879.2  | 2.5 |
| HCC125 | HCC | CHCAMS | Female | 37 | 884.8  | 1.5 |
| HCC126 | HCC | CHCAMS | Female | 72 | 887.6  | 3.9 |
| HCC127 | HCC | CHCAMS | Female | 72 | 896.9  | 6.6 |
| HCC128 | HCC | CHCAMS | Male   | 48 | 886.4  | 3.5 |
| HCC129 | HCC | CHCAMS | Male   | 44 | 892.3  | 3.0 |
| HCC130 | HCC | CHCAMS | Male   | 49 | 894.8  | 4.3 |
| HCC131 | HCC | CHCAMS | Male   | 42 | 906.4  | 1.8 |
| HCC132 | HCC | CHCAMS | Female | 74 | 904.7  | 2.2 |
| HCC133 | HCC | CHCAMS | Male   | 69 | 904.9  | 2.6 |
| HCC134 | HCC | CHCAMS | Male   | 37 | 908.7  | 2.0 |
| HCC135 | HCC | CHCAMS | Male   | 74 | 930.1  | 2.2 |
| HCC136 | HCC | CHCAMS | Male   | 43 | 923.3  | 1.5 |
| HCC137 | HCC | CHCAMS | Female | 26 | 933.1  | 2.3 |
| HCC138 | HCC | CHCAMS | Male   | 61 | 929    | 4.0 |
| HCC139 | HCC | CHCAMS | Male   | 27 | 950.9  | 3.5 |
| HCC140 | HCC | CHCAMS | Female | 27 | 943.7  | 1.8 |
| HCC141 | HCC | CHCAMS | Female | 55 | 956.5  | 2.8 |
| HCC142 | HCC | CHCAMS | Female | 59 | 960    | 1.0 |
| HCC143 | HCC | CHCAMS | Male   | 31 | 968.2  | 2.8 |
| HCC144 | HCC | CHCAMS | Female | 54 | 963.8  | 1.0 |
| HCC145 | HCC | CHCAMS | Female | 51 | 964.4  | 1.7 |
| HCC146 | HCC | CHCAMS | Female | 32 | 974.9  | 0.4 |
| HCC147 | HCC | CHCAMS | Male   | 46 | 986.9  | 1.7 |
| HCC148 | HCC | CHCAMS | Female | 65 | 989.6  | 2.7 |
| HCC149 | HCC | CHCAMS | Female | 39 | 999.1  | 9.3 |
| HCC150 | HCC | CHCAMS | Female | 54 | 984    | 2.0 |
| HCC151 | HCC | CHCAMS | Female | 62 | 994.3  | 1.3 |
| HCC152 | HCC | CHCAMS | Male   | 29 | 1003.6 | 1.6 |
| HCC153 | HCC | CHCAMS | Female | 53 | 998.5  | 1.0 |
| HCC154 | HCC | CHCAMS | Male   | 43 | 1001.5 | 1.7 |

|        |     |        |        |    |        |     |
|--------|-----|--------|--------|----|--------|-----|
| HCC155 | HCC | CHCAMS | Male   | 45 | 1021.6 | 1.0 |
| HCC156 | HCC | CHCAMS | Male   | 55 | 1019   | 3.2 |
| HCC157 | HCC | CHCAMS | Female | 30 | 1018.6 | 2.0 |
| HCC158 | HCC | CHCAMS | Male   | 60 | 1026.1 | 1.7 |
| HCC159 | HCC | CHCAMS | Female | 38 | 1026   | 2.2 |
| HCC160 | HCC | CHCAMS | Female | 43 | 1038   | 1.9 |
| HCC161 | HCC | CHCAMS | Female | 71 | 1053.7 | 1.1 |
| HCC162 | HCC | CHCAMS | Female | 42 | 1061.6 | 2.0 |
| HCC163 | HCC | CHCAMS | Male   | 34 | 1057.8 | 2.2 |
| HCC164 | HCC | CHCAMS | Male   | 60 | 1056.9 | 1.3 |
| HCC165 | HCC | CHCAMS | Male   | 52 | 1066.5 | 1.7 |
| HCC166 | HCC | CHCAMS | Male   | 42 | 1074.1 | 1.0 |
| HCC167 | HCC | CHCAMS | Female | 48 | 1080.8 | 2.1 |
| HCC168 | HCC | CHCAMS | Male   | 74 | 1077.7 | 2.7 |
| HCC169 | HCC | CHCAMS | Male   | 30 | 1084.4 | 0.6 |
| HCC170 | HCC | CHCAMS | Male   | 53 | 1111.1 | 1.3 |
| HCC171 | HCC | CHCAMS | Female | 46 | 1111.4 | 6.5 |
| HCC172 | HCC | CHCAMS | Female | 44 | 1127.1 | 2.2 |
| HCC173 | HCC | CHCAMS | Male   | 44 | 1124.8 | 3.0 |
| HCC174 | HCC | CHCAMS | Male   | 44 | 1133.2 | 2.7 |
| HCC175 | HCC | CHCAMS | Male   | 27 | 1134.2 | 2.1 |
| HCC176 | HCC | CHCAMS | Male   | 66 | 1146.3 | 4.9 |
| HCC177 | HCC | CHCAMS | Male   | 56 | 1140.6 | 2.2 |
| HCC178 | HCC | CHCAMS | Female | 68 | 1148.1 | 1.8 |
| HCC179 | HCC | CHCAMS | Male   | 26 | 1148.3 | 0.8 |
| HCC180 | HCC | CHCAMS | Female | 28 | 1153.1 | 2.8 |
| HCC181 | HCC | CHCAMS | Male   | 68 | 1151.4 | 1.1 |
| HCC182 | HCC | CHCAMS | Male   | 65 | 1163.7 | 2.1 |
| HCC183 | HCC | CHCAMS | Female | 57 | 1166.3 | 0.3 |
| HCC184 | HCC | CHCAMS | Female | 63 | 1181.6 | 3.5 |
| HCC185 | HCC | CHCAMS | Male   | 37 | 1177.1 | 2.0 |
| HCC186 | HCC | CHCAMS | Female | 73 | 1181.8 | 4.0 |
| HCC187 | HCC | CHCAMS | Female | 29 | 1185.3 | 2.9 |
| HCC188 | HCC | CHCAMS | Male   | 41 | 1186.3 | 1.0 |
| HCC189 | HCC | CHCAMS | Male   | 45 | 1188.7 | 3.8 |
| HCC190 | HCC | CHCAMS | Female | 51 | 1193.7 | 2.4 |
| HCC191 | HCC | CHCAMS | Female | 47 | 1204   | 1.3 |
| HCC192 | HCC | CHCAMS | Female | 47 | 1197.3 | 2.0 |
| HCC193 | HCC | CHCAMS | Female | 59 | 1199.3 | 2.8 |
| HCC194 | HCC | CHCAMS | Female | 66 | 1220.3 | 4.4 |
| HCC195 | HCC | CHCAMS | Female | 38 | 1226   | 2.1 |
| HCC196 | HCC | CHCAMS | Male   | 48 | 1231   | 3.4 |
| HCC197 | HCC | CHCAMS | Female | 58 | 1239   | 2.2 |
| HCC198 | HCC | CHCAMS | Male   | 58 | 1248.8 | 1.5 |

|        |     |        |        |    |        |     |
|--------|-----|--------|--------|----|--------|-----|
| HCC199 | HCC | CHCAMS | Male   | 37 | 1257.2 | 1.7 |
| HCC200 | HCC | CHCAMS | Female | 34 | 1258.2 | 1.2 |
| HCC201 | HCC | CHCAMS | Female | 40 | 1273.5 | 5.9 |
| HCC202 | HCC | CHCAMS | Male   | 55 | 1258.8 | 5.1 |
| HCC203 | HCC | CHCAMS | Male   | 52 | 1106.0 | 0.2 |
| HCC204 | HCC | CHCAMS | Female | 60 | 1007.2 | 0.4 |
| HCC205 | HCC | CHCAMS | Female | 33 | 1186.7 | 6.4 |
| HCC206 | HCC | CHCAMS | Female | 37 | 1269.9 | 0.8 |
| HCC207 | HCC | CHCAMS | Female | 38 | 1226.6 | 2.4 |
| HCC208 | HCC | CHCAMS | Male   | 32 | 1161.8 | 1.7 |
| HCC209 | HCC | CHCAMS | Male   | 59 | 1155.2 | 0.5 |
| HCC210 | HCC | CHCAMS | Male   | 44 | 1164.5 | 1.2 |
| HCC211 | HCC | CHCAMS | Female | 37 | 1265.5 | 1.2 |
| HCC212 | HCC | CHCAMS | Male   | 37 | 1288.6 | 1.0 |
| HCC213 | HCC | CHCAMS | Female | 60 | 1297.8 | 5.8 |
| HCC214 | HCC | CHCAMS | Male   | 59 | 1140.7 | 1.8 |
| HCC215 | HCC | CHCAMS | Male   | 42 | 1163.6 | 2.5 |
| HCC216 | HCC | CHCAMS | Female | 54 | 1267.0 | 3.8 |
| HCC217 | HCC | CHCAMS | Male   | 56 | 1102.6 | 2.2 |
| HCC218 | HCC | CHCAMS | Male   | 69 | 1077.1 | 4.6 |
| HCC219 | HCC | CHCAMS | Male   | 56 | 1198.1 | 1.8 |
| HCC220 | HCC | CHCAMS | Female | 34 | 1133.7 | 3.6 |
| HCC221 | HCC | CHCAMS | Male   | 51 | 1224.8 | 2.0 |
| HCC222 | HCC | CHCAMS | Female | 68 | 1334.4 | 5.8 |
| HCC223 | HCC | CHCAMS | Female | 45 | 1341.6 | 3.1 |
| HCC224 | HCC | CHCAMS | Male   | 32 | 1339.6 | 1.9 |
| HCC225 | HCC | CHCAMS | Male   | 55 | 1343.6 | 4.3 |
| HCC226 | HCC | CHCAMS | Male   | 55 | 1364.1 | 1.6 |
| HCC227 | HCC | CHCAMS | Female | 57 | 1363.6 | 5.2 |
| HCC228 | HCC | CHCAMS | Female | 46 | 1368.1 | 2.9 |
| HCC229 | HCC | CHCAMS | Female | 33 | 1367.6 | 1.3 |
| HCC230 | HCC | CHCAMS | Male   | 59 | 1378   | 2.2 |
| HCC231 | HCC | CHCAMS | Male   | 72 | 1371.7 | 2.2 |
| HCC232 | HCC | CHCAMS | Female | 26 | 1302.4 | 6.4 |
| HCC233 | HCC | CHCAMS | Female | 50 | 1370   | 2.9 |
| HCC234 | HCC | CHCAMS | Female | 34 | 1384.1 | 3.8 |
| HCC235 | HCC | CHCAMS | Male   | 53 | 1218.2 | 1.5 |
| HCC236 | HCC | CHCAMS | Male   | 34 | 1392   | 4.4 |
| HCC237 | HCC | CHCAMS | Male   | 33 | 1472.6 | 2.6 |
| HCC238 | HCC | CHCAMS | Female | 37 | 1255.1 | 1.1 |
| HCC239 | HCC | CHCAMS | Female | 57 | 1255.6 | 1.1 |
| HCC240 | HCC | CHCAMS | Female | 34 | 1325.3 | 4.5 |
| HCC241 | HCC | CHCAMS | Female | 59 | 1172   | 3.6 |
| HCC242 | HCC | CHCAMS | Male   | 67 | 1335.1 | 3.8 |

|        |                |        |        |    |        |      |
|--------|----------------|--------|--------|----|--------|------|
| HCC243 | HCC            | CHCAMS | Female | 26 | 1172.5 | 6.3  |
| HCC244 | HCC            | CHCAMS | Male   | 70 | 1361.9 | 1.5  |
| HCC245 | HCC            | CHCAMS | Female | 51 | 1303.5 | 1.3  |
| HCC246 | HCC            | CHCAMS | Female | 45 | 1316.8 | 2.9  |
| HCC247 | HCC            | CHCAMS | Male   | 40 | 1263.3 | 0.8  |
| HCC248 | HCC            | CHCAMS | Male   | 49 | 1182.3 | 2.1  |
| HCC249 | HCC            | CHCAMS | Male   | 70 | 1282.9 | 8.9  |
| HCC250 | HCC            | CHCAMS | Female | 73 | 1289.3 | 1.4  |
| HCC251 | HCC            | CHCAMS | Male   | 72 | 1558   | 2.2  |
| HCC252 | HCC            | CHCAMS | Female | 68 | 1458.7 | 1.4  |
| HCC253 | HCC            | CHCAMS | Male   | 46 | 1592.4 | 4.4  |
| HCC254 | HCC            | CHCAMS | Female | 35 | 1588.1 | 3.9  |
| HCC255 | HCC            | CHCAMS | Female | 59 | 1660.7 | 2.9  |
| HCC256 | HCC            | CHCAMS | Female | 57 | 1682.9 | 0.8  |
| HCC257 | HCC            | CHCAMS | Male   | 42 | 1677   | 2.1  |
| HCC258 | HCC            | CHCAMS | Male   | 41 | 1831   | 5.1  |
| HCC259 | HCC            | CHCAMS | Female | 48 | 1795.8 | 2.3  |
| HCC260 | HCC            | CHCAMS | Female | 60 | 1802.3 | 2.8  |
| HCC261 | HCC            | CHCAMS | Female | 36 | 1769.6 | 1.4  |
| HCC262 | HCC            | CHCAMS | Female | 32 | 1883.6 | 2.7  |
| HCC263 | HCC            | CHCAMS | Male   | 31 | 1932.1 | 3.9  |
| HCC264 | HCC            | CHCAMS | Male   | 56 | 2028.1 | 0.5  |
| HIN1   | Colorectal HIN | SYSUCC | Male   | 64 | 952.8  | 6.1  |
| HIN2   | Colorectal HIN | SYSUCC | Female | 69 | 781.4  | 5.3  |
| HIN3   | Colorectal HIN | SYSUCC | Female | 34 | 1104.4 | 11.2 |
| HIN4   | Colorectal HIN | SYSUCC | Male   | 62 | 1319.3 | 27.4 |
| HIN5   | Colorectal HIN | SYSUCC | Male   | 69 | 1433.1 | 35.5 |
| HIN6   | Colorectal HIN | SYSUCC | Male   | 55 | 991.3  | 9.7  |
| HIN7   | Colorectal HIN | SYSUCC | Male   | 54 | 1003.2 | 6.9  |
| HIN8   | Colorectal HIN | SYSUCC | Male   | 30 | 1130   | 17.7 |
| HIN9   | Colorectal HIN | SYSUCC | Male   | 27 | 1040.5 | 9.0  |
| HIN10  | Colorectal HIN | SYSUCC | Male   | 55 | 1030.4 | 12.6 |
| HIN11  | Colorectal HIN | SYSUCC | Male   | 36 | 1212.4 | 20.4 |
| HIN12  | Colorectal HIN | SYSUCC | Male   | 27 | 1270.8 | 17.0 |
| HIN13  | Colorectal HIN | SYSUCC | Female | 50 | 1176.2 | 14.2 |
| HIN14  | Colorectal HIN | SYSUCC | Female | 67 | 1384.1 | 20.5 |
| HIN15  | Colorectal HIN | SYSUCC | Male   | 55 | 1301.3 | 13.6 |
| HIN16  | Colorectal HIN | SYSUCC | Female | 46 | 1474   | 25.1 |
| HIN17  | Colorectal HIN | SYSUCC | Female | 59 | 1323.7 | 12.8 |
| HIN18  | Colorectal HIN | SYSUCC | Female | 63 | 1505.4 | 22.0 |
| HIN19  | Colorectal HIN | SYSUCC | Female | 41 | 1371.9 | 11.0 |
| HIN20  | Colorectal HIN | SYSUCC | Male   | 53 | 1426.4 | 1.8  |
| HIN21  | Colorectal HIN | SYSUCC | Male   | 59 | 1504.8 | 17.9 |
| HIN22  | Colorectal HIN | SYSUCC | Female | 47 | 1381.7 | 10.9 |

|       |                |        |        |    |        |      |
|-------|----------------|--------|--------|----|--------|------|
| HIN23 | Colorectal HIN | SYSUCC | Male   | 36 | 1337.6 | 13.3 |
| HIN24 | Colorectal HIN | SYSUCC | Male   | 42 | 1519.6 | 21.4 |
| HIN25 | Colorectal HIN | SYSUCC | Male   | 31 | 1542.2 | 5.9  |
| HIN26 | Colorectal HIN | SYSUCC | Female | 48 | 1725.6 | 24.6 |
| HIN27 | Colorectal HIN | SYSUCC | Female | 28 | 2022.9 | 35.5 |
| HIN28 | Colorectal HIN | SYSUCC | Male   | 31 | 1649.3 | 28.2 |
| HIN29 | Colorectal HIN | SYSUCC | Male   | 60 | 1397.2 | 10.4 |
| HIN30 | Colorectal HIN | SYSUCC | Female | 49 | 1775.2 | 35.2 |
| HIN31 | Colorectal HIN | SYSUCC | Female | 66 | 1496.8 | 7.1  |
| HIN32 | Colorectal HIN | SYSUCC | Female | 30 | 1940.4 | 3.0  |
| HIN33 | Colorectal HIN | SYSUCC | Female | 35 | 1738.1 | 26.4 |
| HIN34 | Colorectal HIN | SYSUCC | Male   | 58 | 1465.2 | 9.6  |
| HIN35 | Colorectal HIN | SYSUCC | Female | 44 | 1509.7 | 6.4  |
| HIN36 | Colorectal HIN | SYSUCC | Female | 67 | 1457.3 | 9.5  |
| HIN37 | Colorectal HIN | SYSUCC | Male   | 33 | 1544.6 | 12.7 |
| HIN38 | Colorectal HIN | SYSUCC | Male   | 52 | 1729.7 | 15.4 |
| HIN39 | Colorectal HIN | SYSUCC | Male   | 68 | 1577.5 | 19.1 |
| HIN40 | Colorectal HIN | SYSUCC | Male   | 45 | 1520.9 | 6.3  |
| HIN41 | Colorectal HIN | SYSUCC | Female | 73 | 1676.6 | 8.3  |
| HIN42 | Colorectal HIN | SYSUCC | Male   | 34 | 1833.2 | 23.3 |
| HIN43 | Colorectal HIN | SYSUCC | Male   | 70 | 1935.2 | 27.5 |
| HIN44 | Colorectal HIN | SYSUCC | Male   | 33 | 1561.8 | 5.7  |
| HIN45 | Colorectal HIN | SYSUCC | Male   | 39 | 1504.1 | 13.3 |
| HIN46 | Colorectal HIN | SYSUCC | Female | 69 | 1520.6 | 5.5  |
| HIN47 | Colorectal HIN | SYSUCC | Male   | 33 | 1523.7 | 4.9  |
| HIN48 | Colorectal HIN | SYSUCC | Female | 56 | 1568.2 | 6.0  |
| HIN49 | Colorectal HIN | SYSUCC | Male   | 34 | 1737.2 | 17.1 |
| HIN50 | Colorectal HIN | SYSUCC | Male   | 64 | 1884.4 | 24.8 |
| HIN51 | Colorectal HIN | SYSUCC | Male   | 59 | 1642.1 | 8.6  |
| HIN52 | Colorectal HIN | SYSUCC | Male   | 47 | 1768.1 | 14.8 |
| HIN53 | Colorectal HIN | SYSUCC | Male   | 40 | 1560.6 | 6.8  |
| HIN54 | Colorectal HIN | SYSUCC | Female | 36 | 1687.4 | 12.9 |
| HIN55 | Colorectal HIN | SYSUCC | Female | 33 | 1642.2 | 17.9 |
| HIN56 | Colorectal HIN | SYSUCC | Female | 62 | 1665.3 | 16.8 |
| HIN57 | Colorectal HIN | SYSUCC | Male   | 75 | 1756   | 6.4  |
| HIN58 | Colorectal HIN | SYSUCC | Female | 70 | 1772.3 | 7.6  |
| HIN59 | Colorectal HIN | SYSUCC | Female | 26 | 1781.4 | 16.0 |
| HIN60 | Colorectal HIN | SYSUCC | Male   | 43 | 1653.4 | 11.4 |
| HIN61 | Colorectal HIN | SYSUCC | Male   | 31 | 1908.8 | 34.9 |
| HIN62 | Colorectal HIN | SYSUCC | Female | 48 | 1796.2 | 13.9 |
| HIN63 | Colorectal HIN | SYSUCC | Male   | 71 | 1801.7 | 9.2  |
| HIN64 | Colorectal HIN | SYSUCC | Male   | 68 | 1812.6 | 6.9  |
| HIN65 | Colorectal HIN | SYSUCC | Female | 60 | 1923.8 | 6.2  |
| HIN66 | Colorectal HIN | SYSUCC | Male   | 69 | 2036.9 | 14.0 |

|       |                |        |        |    |        |      |
|-------|----------------|--------|--------|----|--------|------|
| HIN67 | Colorectal HIN | SYSUCC | Female | 67 | 2098.9 | 26.5 |
| HIN68 | Colorectal HIN | SYSUCC | Female | 57 | 2374.9 | 10.1 |
| HIN69 | Colorectal HIN | SYSUCC | Male   | 51 | 2933.3 | 7.6  |
| HIN70 | Colorectal HIN | SYSUCC | Female | 73 | 2040.6 | 8.4  |
| HIN71 | Colorectal HIN | SYSUCC | Male   | 44 | 2061.5 | 11.1 |
| HIN72 | Colorectal HIN | SYSUCC | Male   | 73 | 1362.5 | 4.2  |
| HIN73 | Colorectal HIN | SYSUCC | Female | 63 | 1883.9 | 14.6 |
| HIN74 | Colorectal HIN | SYSUCC | Male   | 53 | 1639.1 | 21.1 |
| HIN75 | Colorectal HIN | SYSUCC | Male   | 53 | 1422.6 | 1.7  |
| HIN76 | Colorectal HIN | SYSUCC | Male   | 70 | 2338.4 | 30.7 |
| HIN77 | Colorectal HIN | SYSUCC | Female | 61 | 1789.6 | 16.7 |
| HIN78 | Colorectal HIN | SYSUCC | Female | 69 | 1748.9 | 13.4 |
| HIN79 | Colorectal HIN | SYSUCC | Male   | 39 | 1970.7 | 25.6 |
| HIN80 | Colorectal HIN | SYSUCC | Male   | 45 | 1627.2 | 9.0  |
| HIN81 | Colorectal HIN | SYSUCC | Female | 63 | 1572.8 | 19.0 |
| CP1   | CP             | SYSUCC | Male   | 75 | 1114.7 | 4.0  |
| CP2   | CP             | SYSUCC | Female | 43 | 1363.5 | 1.0  |
| CP3   | CP             | SYSUCC | Male   | 49 | 978.6  | 8.0  |
| CP4   | CP             | SYSUCC | Female | 72 | 1456.7 | 9.0  |
| CP5   | CP             | SYSUCC | Male   | 34 | 1081   | 4.2  |
| CP6   | CP             | SYSUCC | Male   | 25 | 1134   | 4.8  |
| CP7   | CP             | SYSUCC | Male   | 29 | 994.3  | 4.4  |
| CP8   | CP             | SYSUCC | Male   | 68 | 1553.9 | 3.8  |
| CP9   | CP             | SYSUCC | Male   | 59 | 1132.4 | 14.0 |
| CP10  | CP             | SYSUCC | Male   | 33 | 1276.9 | 14.7 |
| CP11  | CP             | SYSUCC | Female | 38 | 1129.1 | 3.8  |
| CP12  | CP             | SYSUCC | Female | 50 | 1224.2 | 9.4  |
| CP13  | CP             | SYSUCC | Female | 25 | 1334.9 | 7.6  |
| CP14  | CP             | SYSUCC | Male   | 37 | 1206   | 5.0  |
| CP15  | CP             | SYSUCC | Male   | 39 | 1484.8 | 24.4 |
| CP16  | CP             | SYSUCC | Female | 40 | 1527   | 11.0 |
| CP17  | CP             | SYSUCC | Female | 41 | 1625.4 | 12.5 |
| CP18  | CP             | SYSUCC | Female | 66 | 1412.5 | 1.1  |
| CP19  | CP             | SYSUCC | Female | 69 | 1462.5 | 3.1  |
| CP20  | CP             | SYSUCC | Male   | 53 | 1467.2 | 1.9  |
| CP21  | CP             | SYSUCC | Female | 61 | 1655   | 4.8  |
| CP22  | CP             | SYSUCC | Male   | 47 | 1852.7 | 17.9 |
| CP23  | CP             | SYSUCC | Female | 28 | 912.3  | 10.6 |
| CP24  | CP             | SYSUCC | Female | 26 | 951.1  | 8.7  |
| CP25  | CP             | SYSUCC | Female | 51 | 1192.5 | 13.4 |
| CP26  | CP             | SYSUCC | Female | 49 | 1183.8 | 7.6  |
| CP27  | CP             | SYSUCC | Male   | 70 | 1063.7 | 2.3  |
| CP28  | CP             | SYSUCC | Female | 75 | 1318.1 | 4.1  |
| CP29  | CP             | SYSUCC | Male   | 54 | 1175.1 | 8.5  |



|      |    |        |        |    |        |      |
|------|----|--------|--------|----|--------|------|
| CP30 | CP | SYSUCC | Female | 26 | 1339.3 | 12.6 |
| CP31 | CP | SYSUCC | Male   | 42 | 1352.5 | 14.2 |
| CP32 | CP | SYSUCC | Female | 62 | 1370.8 | 11.0 |
| CP33 | CP | SYSUCC | Male   | 52 | 1375.8 | 2.1  |
| CP34 | CP | SYSUCC | Male   | 71 | 1515   | 10.3 |
| CP35 | CP | SYSUCC | Female | 60 | 1227.7 | 9.3  |
| CP36 | CP | SYSUCC | Female | 29 | 1306.8 | 9.4  |
| CP37 | CP | SYSUCC | Female | 50 | 1038.9 | 3.9  |
| CP38 | CP | SYSUCC | Male   | 25 | 630.7  | 5.8  |
| CP39 | CP | SYSUCC | Female | 26 | 1127.3 | 7.2  |
| CP40 | CP | SYSUCC | Male   | 59 | 1193.8 | 11.4 |
| CP41 | CP | SYSUCC | Female | 53 | 818.3  | 16.2 |
| CP42 | CP | SYSUCC | Female | 27 | 1526.6 | 14.2 |
| CP43 | CP | SYSUCC | Female | 40 | 1261   | 9.4  |
| CP44 | CP | SYSUCC | Male   | 25 | 796    | 11.5 |
| CP45 | CP | SYSUCC | Male   | 34 | 1193.6 | 18.8 |
| CP46 | CP | SYSUCC | Female | 27 | 891.8  | 22.0 |
| CP47 | CP | SYSUCC | Male   | 48 | 747.8  | 11.0 |
| CP48 | CP | SYSUCC | Male   | 63 | 906    | 5.4  |
| CP49 | CP | SYSUCC | Male   | 73 | 1470.2 | 10.4 |
| CP50 | CP | SYSUCC | Male   | 38 | 924.2  | 5.6  |
| CP51 | CP | SYSUCC | Male   | 31 | 968.9  | 2.4  |
| CP52 | CP | SYSUCC | Male   | 64 | 768.1  | 9.8  |
| CP53 | CP | SYSUCC | Male   | 72 | 1017.2 | 11.4 |
| CP54 | CP | SYSUCC | Female | 37 | 918.6  | 8.7  |
| CP55 | CP | SYSUCC | Male   | 51 | 1077.3 | 6.7  |
| CP56 | CP | SYSUCC | Female | 46 | 1264.3 | 8.9  |
| CP57 | CP | SYSUCC | Female | 49 | 522.6  | 8.2  |
| CP58 | CP | SYSUCC | Male   | 35 | 1148.7 | 18.4 |
| CP59 | CP | SYSUCC | Male   | 69 | 1546.1 | 14.3 |
| CP60 | CP | SYSUCC | Male   | 52 | 748.2  | 15.1 |
| CP61 | CP | SYSUCC | Female | 29 | 1362   | 3.7  |
| CP62 | CP | SYSUCC | Female | 39 | 1466.6 | 14.9 |
| CP63 | CP | SYSUCC | Female | 39 | 1263   | 10.6 |
| CP64 | CP | SYSUCC | Male   | 35 | 1315.2 | 9.6  |
| CP65 | CP | SYSUCC | Female | 39 | 1051.7 | 7.3  |
| CP66 | CP | SYSUCC | Female | 31 | 829.5  | 12.1 |
| CP67 | CP | SYSUCC | Male   | 60 | 789.6  | 0.7  |
| CP68 | CP | SYSUCC | Female | 26 | 980.5  | 21.0 |
| CP69 | CP | SYSUCC | Female | 70 | 1093.5 | 14.0 |
| CP70 | CP | SYSUCC | Female | 49 | 811.4  | 25.7 |
| CP71 | CP | SYSUCC | Male   | 59 | 633    | 8.3  |
| CP72 | CP | SYSUCC | Female | 43 | 792.1  | 13.8 |
| CP73 | CP | SYSUCC | Female | 44 | 1495.7 | 7.9  |

|       |    |        |        |    |        |      |
|-------|----|--------|--------|----|--------|------|
| CP74  | CP | SYSUCC | Female | 31 | 1440.5 | 5.2  |
| CP75  | CP | SYSUCC | Male   | 69 | 1236.6 | 11.1 |
| CP76  | CP | SYSUCC | Male   | 27 | 1420.4 | 6.5  |
| CP77  | CP | SYSUCC | Male   | 69 | 1395.5 | 7.7  |
| CP78  | CP | SYSUCC | Male   | 60 | 1559.1 | 4.8  |
| CP79  | CP | SYSUCC | Female | 26 | 1212.4 | 11.6 |
| CP80  | CP | SYSUCC | Male   | 67 | 640.3  | 9.3  |
| CP81  | CP | SYSUCC | Female | 28 | 1184   | 14.2 |
| CP82  | CP | SYSUCC | Female | 52 | 1162.7 | 13.7 |
| CP83  | CP | SYSUCC | Female | 57 | 1143.5 | 11.8 |
| CP84  | CP | SYSUCC | Male   | 61 | 1373.2 | 7.1  |
| CP85  | CP | SYSUCC | Female | 49 | 1541.8 | 15.2 |
| CP86  | CP | SYSUCC | Male   | 60 | 1654.6 | 14.2 |
| CP87  | CP | SYSUCC | Female | 30 | 751.9  | 21.8 |
| CP88  | CP | SYSUCC | Male   | 28 | 1067.6 | 4.6  |
| CP89  | CP | SYSUCC | Male   | 45 | 745.4  | 4.5  |
| CP90  | CP | SYSUCC | Male   | 75 | 1301.2 | 4.5  |
| CP91  | CP | SYSUCC | Female | 54 | 497.3  | 5.5  |
| CP92  | CP | SYSUCC | Female | 62 | 955.8  | 14.8 |
| CP93  | CP | SYSUCC | Male   | 49 | 1207.7 | 18.4 |
| CP94  | CP | SYSUCC | Male   | 26 | 1082.8 | 7.9  |
| CP95  | CP | SYSUCC | Female | 52 | 1284.5 | 5.2  |
| CP96  | CP | SYSUCC | Male   | 42 | 1280.9 | 5.6  |
| CP97  | CP | SYSUCC | Female | 72 | 801.6  | 5.6  |
| CP98  | CP | SYSUCC | Female | 34 | 1333.1 | 10.9 |
| CP99  | CP | SYSUCC | Male   | 54 | 893.3  | 8.6  |
| CP100 | CP | SYSUCC | Female | 45 | 1391.6 | 1.9  |
| CP101 | CP | SYSUCC | Male   | 73 | 1362.6 | 8.7  |
| CP102 | CP | SYSUCC | Male   | 62 | 863    | 0.5  |
| CP103 | CP | SYSUCC | Male   | 57 | 894.5  | 8.4  |
| CP104 | CP | SYSUCC | Female | 37 | 914.5  | 5.5  |
| CP105 | CP | SYSUCC | Male   | 65 | 831.3  | 16.8 |
| CP106 | CP | SYSUCC | Male   | 65 | 705.3  | 6.7  |
| CP107 | CP | SYSUCC | Female | 55 | 1005.8 | 9.2  |
| CP108 | CP | SYSUCC | Female | 52 | 1276.4 | 5.7  |
| CP109 | CP | SYSUCC | Male   | 72 | 1606.6 | 24.1 |
| CP110 | CP | SYSUCC | Male   | 63 | 1088.2 | 2.5  |
| CP111 | CP | SYSUCC | Female | 27 | 795.5  | 7.6  |

<sup>1</sup>ESCC, esophageal squamous-cell carcinoma; GCC, gastric cardia carcinoma; GC, gastric carcinoma; PDAC, pancreatic ductal adenocarcinoma; HCC, hepatocellular carcinoma; Colorectal HIN, high-grade intraepithelial neoplasia of colorectum; CP, colorectal polyps.

<sup>2</sup>SYSUCC, Sun Yat-sen University Cancer Center (Guangzhou, China); CHCAMS, Cancer Hospital of Chinese Academy of Medical Sciences (Beijing, China).

<sup>3</sup>Mean of triplicate measurements and the standard error of mean (SEM). Serum piR-54265 level was determined from blood of individuals at diagnosis prior to any treatments.

**Table S2.** Demographic and clinical characteristics and serum piR-54265 level of patients with CRC

| Sample ID | Patient <sup>1</sup> | Sex    | Age<br>(year) | CRC<br>location | TNM<br>stage | Serum piR-54265 <sup>2</sup> |      |                       |      |
|-----------|----------------------|--------|---------------|-----------------|--------------|------------------------------|------|-----------------------|------|
|           |                      |        |               |                 |              | Before surgery               |      | After surgery         |      |
|           |                      |        |               |                 |              | Mean<br>copy/ $\mu$ L        | SEM  | Mean<br>copy/ $\mu$ L | SEM  |
| Pre-1     | SYSUCC               | Male   | 39            | Colon           | IV           | 4342.2                       | 3.9  | 2490.3                | 6.3  |
| Pre-2     | SYSUCC               | Female | 42            | Rectum          | III          | 3360.3                       | 6.5  | 2283.4                | 6.3  |
| Pre-3     | SYSUCC               | Male   | 61            | Colon           | I            | 3134.2                       | 10.4 | 1465.6                | 5.1  |
| Pre-4     | SYSUCC               | Male   | 59            | Rectum          | II           | 2252.6                       | 13.2 | 927.4                 | 4.1  |
| Pre-5     | SYSUCC               | Female | 58            | Rectum          | II           | 1757.8                       | 10.2 | 1051.0                | 7.5  |
| Pre-6     | SYSUCC               | Male   | 49            | Colon           | II           | 6922.2                       | 19.3 | 1599.5                | 6.0  |
| Pre-7     | SYSUCC               | Female | 72            | Colon           | II           | 3431.9                       | 15.5 | 780.6                 | 7.0  |
| Pre-8     | SYSUCC               | Male   | 72            | Rectum          | II           | 2960.2                       | 1.6  | 1489.0                | 5.6  |
| Pre-9     | SYSUCC               | Female | 60            | Rectum          | II           | 2607.8                       | 13.8 | 1225.6                | 4.4  |
| Pre-10    | SYSUCC               | Female | 73            | Colon           | II           | 2657.6                       | 3.4  | 1532.1                | 5.0  |
| Pre-11    | SYSUCC               | Female | 45            | Rectum          | IV           | 4010.4                       | 6.0  | 2288.9                | 5.6  |
| Pre-12    | SYSUCC               | Male   | 69            | Rectum          | III          | 3013.7                       | 13.7 | 2420.8                | 7.0  |
| Pre-13    | SYSUCC               | Male   | 47            | Colon           | II           | 2272.9                       | 10.5 | 1088.1                | 4.4  |
| Pre-14    | SYSUCC               | Female | 78            | Rectum          | II           | 2742.9                       | 10.9 | 1055.3                | 3.9  |
| Pre-15    | SYSUCC               | Male   | 60            | Rectum          | II           | 2056.3                       | 6.4  | 662.7                 | 6.9  |
| Pre-16    | SYSUCC               | Male   | 59            | Rectum          | II           | 3070.1                       | 19.9 | 1205.2                | 9.5  |
| Pre-17    | SYSUCC               | Male   | 72            | Colon           | III          | 3890.9                       | 11.5 | 1221.0                | 7.4  |
| Pre-18    | SYSUCC               | Male   | 75            | Colon           | II           | 4085.0                       | 7.4  | 1341.0                | 9.6  |
| Pre-19    | SYSUCC               | Female | 56            | Rectum          | III          | 1834.3                       | 17.2 | 1147.8                | 6.3  |
| Pre-20    | SYSUCC               | Male   | 73            | Colon           | I            | 1794.5                       | 3.9  | 1404.8                | 6.7  |
| Pre-21    | SYSUCC               | Male   | 74            | Colon           | I            | 2581.8                       | 4.6  | 1647.4                | 4.5  |
| Pre-22    | SYSUCC               | Female | 72            | Rectum          | II           | 1638.3                       | 3.9  | 764.5                 | 10.5 |
| Pre-23    | SYSUCC               | Male   | 72            | Rectum          | III          | 2014.4                       | 7.7  | 1076.5                | 11.4 |
| Pre-24    | SYSUCC               | Female | 60            | Rectum          | I            | 1726.3                       | 6.9  | 844.4                 | 4.0  |
| Pre-25    | SYSUCC               | Female | 73            | Colon           | II           | 2480.7                       | 5.1  | 1480.8                | 5.1  |
| Pre-26    | SYSUCC               | Female | 45            | Colon           | II           | 3536.6                       | 6.3  | 2370.9                | 1.1  |
| Pre-27    | SYSUCC               | Male   | 69            | Rectum          | II           | 1565.1                       | 5.3  | 733.0                 | 7.9  |
| Pre-28    | SYSUCC               | Male   | 47            | Colon           | I            | 3089.1                       | 6.1  | 1571.2                | 5.2  |
| Pre-29    | SYSUCC               | Female | 78            | Rectum          | III          | 2326.5                       | 5.7  | 1385.5                | 6.5  |
| Pre-30    | SYSUCC               | Male   | 60            | Rectum          | II           | 2273.7                       | 1.4  | 1186.4                | 6.1  |
| Pre-31    | SYSUCC               | Male   | 59            | Colon           | II           | 2204.4                       | 7.5  | 1237.3                | 10.1 |
| Pre-32    | SYSUCC               | Male   | 72            | Colon           | II           | 3123.4                       | 4.7  | 2040.1                | 3.2  |
| Pre-33    | SYSUCC               | Male   | 75            | Colon           | I            | 2105.3                       | 5.5  | 1685.8                | 38.5 |
| Pre-34    | SYSUCC               | Male   | 72            | Rectum          | II           | 2326.1                       | 5.6  | 1968.0                | 11.6 |
| Pre-35    | SYSUCC               | Male   | 58            | Rectum          | II           | 2087.1                       | 5.1  | 1310.1                | 3.7  |
| Pre-36    | SYSUCC               | Male   | 72            | Colon           | III          | 3069.1                       | 7.2  | 2377.4                | 1.4  |
| Pre-37    | SYSUCC               | Male   | 66            | Colon           | IV           | 3418.1                       | 7.3  | 1382.8                | 6.2  |
| Pre-38    | SYSUCC               | Female | 65            | Rectum          | I            | 2633.0                       | 5.8  | 795.7                 | 1.2  |

|            |        |        |    |        |     |        |      |        |      |
|------------|--------|--------|----|--------|-----|--------|------|--------|------|
| Pre-39     | SYSUCC | Female | 52 | Rectum | I   | 2257.1 | 3.3  | 1405.9 | 6.8  |
| Pre-40     | SYSUCC | Male   | 33 | Colon  | II  | 2915.8 | 5.2  | 1876.5 | 9.3  |
| Pre-41     | SYSUCC | Female | 34 | Colon  | II  | 2628.8 | 2.8  | 1342.2 | 0.7  |
| Pre-42     | SYSUCC | Female | 74 | Rectum | I   | 3433.2 | 3.4  | 2400.2 | 19.0 |
| Pre-43     | SYSUCC | Female | 58 | Colon  | II  | 1701.6 | 17.5 | 1362.7 | 7.8  |
| Pre-44     | SYSUCC | Male   | 49 | Colon  | I   | 2270.7 | 5.2  | 1682.7 | 5.1  |
| Pre-45     | SYSUCC | Male   | 44 | Colon  | III | 4826.1 | 6.4  | 2528.8 | 7.3  |
| Pre-46     | SYSUCC | Male   | 77 | Rectum | II  | 2836.5 | 2.7  | 870.0  | 4.6  |
| SYSUCC-562 | SYSUCC | Male   | 78 | Rectum | I   | 1993.8 | 15.5 | --     | --   |
| SYSUCC-563 | SYSUCC | Female | 74 | Rectum | I   | 1568.2 | 1.6  | --     | --   |
| SYSUCC-564 | SYSUCC | Female | 64 | Colon  | I   | 1531.4 | 13.8 | --     | --   |
| SYSUCC-565 | SYSUCC | Female | 61 | Colon  | I   | 1641.7 | 3.4  | --     | --   |
| SYSUCC-566 | SYSUCC | Female | 53 | Rectum | I   | 2282.6 | 6.0  | --     | --   |
| SYSUCC-567 | SYSUCC | Female | 72 | Colon  | I   | 1221.2 | 13.7 | --     | --   |
| SYSUCC-568 | SYSUCC | Male   | 61 | Colon  | I   | 2313.6 | 10.5 | --     | --   |
| SYSUCC-569 | SYSUCC | Male   | 54 | Colon  | I   | 2631.4 | 10.9 | --     | --   |
| SYSUCC-570 | SYSUCC | Female | 64 | Rectum | I   | 1900.3 | 6.4  | --     | --   |
| SYSUCC-571 | SYSUCC | Male   | 65 | Rectum | I   | 2066.6 | 19.9 | --     | --   |
| SYSUCC-572 | SYSUCC | Male   | 60 | Colon  | I   | 2915.4 | 11.5 | --     | --   |
| SYSUCC-573 | SYSUCC | Female | 51 | Rectum | I   | 2495.8 | 7.4  | --     | --   |
| SYSUCC-574 | SYSUCC | Female | 52 | Colon  | I   | 1735.9 | 17.2 | --     | --   |
| SYSUCC-575 | SYSUCC | Female | 61 | Rectum | I   | 1522.4 | 3.9  | --     | --   |
| SYSUCC-576 | SYSUCC | Male   | 61 | Colon  | I   | 2652.4 | 4.6  | --     | --   |
| SYSUCC-577 | SYSUCC | Male   | 58 | Colon  | I   | 2825.0 | 3.9  | --     | --   |
| SYSUCC-578 | SYSUCC | Male   | 47 | Rectum | I   | 2691.0 | 7.7  | --     | --   |
| CHCAMS-001 | CHCAMS | Male   | 33 | Rectum | II  | 915.3  | 21.6 | --     | --   |
| CHCAMS-002 | CHCAMS | Male   | 70 | Rectum | III | 1212.5 | 5.0  | --     | --   |
| CHCAMS-003 | CHCAMS | Male   | 33 | Rectum | III | 1271.9 | 3.1  | --     | --   |
| CHCAMS-004 | CHCAMS | Male   | 39 | Rectum | III | 1199.8 | 21.6 | --     | --   |
| CHCAMS-005 | CHCAMS | Male   | 59 | Rectum | III | 2030.1 | 9.6  | --     | --   |
| CHCAMS-006 | CHCAMS | Female | 51 | Rectum | III | 1155.9 | 17.4 | --     | --   |
| CHCAMS-007 | CHCAMS | Male   | 43 | Rectum | I   | 1431.5 | 4.9  | --     | --   |
| CHCAMS-008 | CHCAMS | Male   | 70 | Rectum | II  | 1141.1 | 10.6 | --     | --   |
| CHCAMS-009 | CHCAMS | Male   | 56 | Rectum | II  | 2113.6 | 12.2 | --     | --   |
| CHCAMS-010 | CHCAMS | Male   | 73 | Rectum | II  | 2180.6 | 13.3 | --     | --   |
| CHCAMS-011 | CHCAMS | Male   | 59 | Rectum | II  | 2361.9 | 6.9  | --     | --   |
| CHCAMS-012 | CHCAMS | Male   | 58 | Rectum | II  | 2572.5 | 1.8  | --     | --   |
| CHCAMS-013 | CHCAMS | Male   | 37 | Rectum | III | 1493.2 | 8.6  | --     | --   |
| CHCAMS-014 | CHCAMS | Male   | 62 | Rectum | III | 1636.3 | 13.0 | --     | --   |
| CHCAMS-015 | CHCAMS | Male   | 45 | Rectum | III | 1318.0 | 22.5 | --     | --   |
| CHCAMS-016 | CHCAMS | Male   | 51 | Rectum | III | 2041.6 | 10.1 | --     | --   |
| CHCAMS-017 | CHCAMS | Male   | 42 | Rectum | III | 2158.3 | 9.4  | --     | --   |
| CHCAMS-018 | CHCAMS | Male   | 60 | Rectum | III | 1806.8 | 13.4 | --     | --   |
| CHCAMS-019 | CHCAMS | Male   | 44 | Rectum | III | 1640.5 | 7.5  | --     | --   |

|            |        |        |    |        |     |        |      |    |    |
|------------|--------|--------|----|--------|-----|--------|------|----|----|
| CHCAMS-020 | CHCAMS | Male   | 38 | Rectum | III | 2652.5 | 20.5 | -- | -- |
| CHCAMS-021 | CHCAMS | Female | 37 | Rectum | III | 1410.9 | 12.2 | -- | -- |
| CHCAMS-022 | CHCAMS | Female | 66 | Rectum | III | 3027.3 | 17.8 | -- | -- |
| CHCAMS-023 | CHCAMS | Female | 54 | Rectum | III | 2307.9 | 6.0  | -- | -- |
| CHCAMS-024 | CHCAMS | Female | 26 | Rectum | III | 3032.8 | 10.4 | -- | -- |
| CHCAMS-025 | CHCAMS | Female | 51 | Rectum | III | 2601.4 | 6.8  | -- | -- |
| CHCAMS-026 | CHCAMS | Male   | 41 | Rectum | II  | 1387.8 | 9.4  | -- | -- |
| CHCAMS-027 | CHCAMS | Male   | 60 | Rectum | II  | 1195.0 | 24.0 | -- | -- |
| CHCAMS-028 | CHCAMS | Male   | 74 | Rectum | II  | 2039.6 | 4.8  | -- | -- |
| CHCAMS-029 | CHCAMS | Male   | 38 | Rectum | II  | 2572.9 | 13.4 | -- | -- |
| CHCAMS-030 | CHCAMS | Female | 50 | Rectum | II  | 2123.5 | 33.0 | -- | -- |
| CHCAMS-031 | CHCAMS | Male   | 57 | Rectum | III | 1163.5 | 5.3  | -- | -- |
| CHCAMS-032 | CHCAMS | Male   | 82 | Rectum | III | 1119.6 | 12.0 | -- | -- |
| CHCAMS-033 | CHCAMS | Male   | 54 | Rectum | III | 1597.7 | 18.9 | -- | -- |
| CHCAMS-034 | CHCAMS | Male   | 50 | Rectum | III | 1487.0 | 18.9 | -- | -- |
| CHCAMS-035 | CHCAMS | Male   | 54 | Rectum | III | 1115.5 | 10.4 | -- | -- |
| CHCAMS-036 | CHCAMS | Male   | 38 | Rectum | III | 1536.4 | 9.8  | -- | -- |
| CHCAMS-037 | CHCAMS | Male   | 67 | Rectum | III | 2079.8 | 13.9 | -- | -- |
| CHCAMS-038 | CHCAMS | Male   | 69 | Rectum | III | 1109.7 | 24.6 | -- | -- |
| CHCAMS-039 | CHCAMS | Male   | 58 | Rectum | III | 2099.1 | 12.3 | -- | -- |
| CHCAMS-040 | CHCAMS | Male   | 65 | Rectum | III | 1733.7 | 6.2  | -- | -- |
| CHCAMS-041 | CHCAMS | Male   | 70 | Rectum | III | 2361.3 | 12.4 | -- | -- |
| CHCAMS-042 | CHCAMS | Male   | 36 | Rectum | III | 2653.9 | 11.8 | -- | -- |
| CHCAMS-043 | CHCAMS | Male   | 57 | Rectum | III | 2692.2 | 21.3 | -- | -- |
| CHCAMS-044 | CHCAMS | Female | 49 | Rectum | III | 1207.4 | 10.2 | -- | -- |
| CHCAMS-045 | CHCAMS | Female | 41 | Rectum | III | 1181.0 | 12.6 | -- | -- |
| CHCAMS-046 | CHCAMS | Female | 43 | Rectum | III | 1351.5 | 20.0 | -- | -- |
| CHCAMS-047 | CHCAMS | Female | 57 | Rectum | III | 2194.2 | 1.0  | -- | -- |
| CHCAMS-048 | CHCAMS | Female | 34 | Rectum | III | 2203.5 | 5.7  | -- | -- |
| CHCAMS-049 | CHCAMS | Male   | 48 | Rectum | III | 1777.3 | 4.5  | -- | -- |
| CHCAMS-050 | CHCAMS | Male   | 29 | Rectum | III | 1820.2 | 15.2 | -- | -- |
| CHCAMS-051 | CHCAMS | Female | 41 | Rectum | III | 2361.1 | 7.5  | -- | -- |
| CHCAMS-052 | CHCAMS | Male   | 67 | Rectum | II  | 2607.9 | 1.8  | -- | -- |
| CHCAMS-053 | CHCAMS | Male   | 71 | Rectum | II  | 2253.9 | 14.5 | -- | -- |
| CHCAMS-054 | CHCAMS | Male   | 66 | Rectum | III | 2659.4 | 33.5 | -- | -- |
| CHCAMS-055 | CHCAMS | Male   | 47 | Rectum | III | 2815.2 | 6.7  | -- | -- |
| CHCAMS-056 | CHCAMS | Male   | 51 | Rectum | II  | 3401.0 | 6.8  | -- | -- |
| CHCAMS-057 | CHCAMS | Female | 54 | Rectum | II  | 3240.9 | 11.4 | -- | -- |
| CHCAMS-058 | CHCAMS | Male   | 64 | Rectum | III | 2790.1 | 18.1 | -- | -- |
| CHCAMS-059 | CHCAMS | Male   | 75 | Rectum | III | 1910.8 | 3.1  | -- | -- |
| CHCAMS-060 | CHCAMS | Male   | 47 | Rectum | III | 2126.3 | 13.4 | -- | -- |
| CHCAMS-061 | CHCAMS | Male   | 47 | Rectum | III | 2624.4 | 9.1  | -- | -- |
| CHCAMS-062 | CHCAMS | Female | 67 | Rectum | III | 2196.9 | 5.1  | -- | -- |
| CHCAMS-063 | CHCAMS | Female | 39 | Rectum | III | 2094.5 | 6.7  | -- | -- |

|            |        |        |    |        |     |        |      |    |    |
|------------|--------|--------|----|--------|-----|--------|------|----|----|
| CHCAMS-064 | CHCAMS | Female | 48 | Rectum | III | 2375.2 | 8.2  | -- | -- |
| CHCAMS-065 | CHCAMS | Female | 72 | Rectum | III | 2239.7 | 1.8  | -- | -- |
| CHCAMS-066 | CHCAMS | Female | 67 | Rectum | III | 2500.1 | 8.1  | -- | -- |
| CHCAMS-067 | CHCAMS | Male   | 44 | Rectum | II  | 2479.4 | 2.2  | -- | -- |
| CHCAMS-068 | CHCAMS | Male   | 72 | Rectum | II  | 3092.2 | 11.0 | -- | -- |
| CHCAMS-069 | CHCAMS | Male   | 29 | Rectum | II  | 3092.8 | 8.8  | -- | -- |
| CHCAMS-070 | CHCAMS | Female | 44 | Rectum | II  | 2360.8 | 10.0 | -- | -- |
| CHCAMS-071 | CHCAMS | Female | 51 | Rectum | II  | 2566.4 | 25.9 | -- | -- |
| CHCAMS-072 | CHCAMS | Female | 54 | Rectum | II  | 2767.2 | 14.1 | -- | -- |
| CHCAMS-073 | CHCAMS | Female | 62 | Rectum | II  | 2875.5 | 14.5 | -- | -- |
| CHCAMS-074 | CHCAMS | Male   | 50 | Rectum | III | 2768.9 | 19.2 | -- | -- |
| CHCAMS-075 | CHCAMS | Male   | 55 | Rectum | III | 2333.9 | 28.3 | -- | -- |
| CHCAMS-076 | CHCAMS | Male   | 62 | Rectum | III | 3024.2 | 12.3 | -- | -- |
| CHCAMS-077 | CHCAMS | Male   | 34 | Rectum | III | 3178.9 | 10.0 | -- | -- |
| CHCAMS-078 | CHCAMS | Male   | 71 | Rectum | III | 2532.0 | 20.4 | -- | -- |
| CHCAMS-079 | CHCAMS | Male   | 34 | Rectum | III | 2748.1 | 20.4 | -- | -- |
| CHCAMS-080 | CHCAMS | Male   | 55 | Rectum | III | 3288.4 | 9.2  | -- | -- |
| CHCAMS-081 | CHCAMS | Male   | 58 | Rectum | III | 3107.3 | 18.9 | -- | -- |
| CHCAMS-082 | CHCAMS | Male   | 68 | Rectum | III | 3548.8 | 16.4 | -- | -- |
| CHCAMS-083 | CHCAMS | Male   | 59 | Rectum | III | 3039.4 | 16.4 | -- | -- |
| CHCAMS-084 | CHCAMS | Male   | 42 | Rectum | III | 3342.3 | 9.1  | -- | -- |
| CHCAMS-085 | CHCAMS | Male   | 53 | Rectum | III | 2905.4 | 12.8 | -- | -- |
| CHCAMS-086 | CHCAMS | Male   | 36 | Rectum | III | 3095.6 | 6.9  | -- | -- |
| CHCAMS-087 | CHCAMS | Female | 72 | Rectum | III | 2426.3 | 7.9  | -- | -- |
| CHCAMS-088 | CHCAMS | Female | 47 | Rectum | III | 2415.1 | 12.2 | -- | -- |
| CHCAMS-089 | CHCAMS | Female | 56 | Rectum | III | 3332.6 | 15.2 | -- | -- |
| CHCAMS-090 | CHCAMS | Female | 56 | Rectum | III | 2808.7 | 5.6  | -- | -- |
| CHCAMS-091 | CHCAMS | Male   | 73 | Rectum | II  | 2888.3 | 12.5 | -- | -- |
| CHCAMS-092 | CHCAMS | Male   | 74 | Rectum | II  | 3059.0 | 3.5  | -- | -- |
| CHCAMS-093 | CHCAMS | Male   | 58 | Rectum | III | 2400.3 | 6.2  | -- | -- |
| CHCAMS-094 | CHCAMS | Male   | 30 | Rectum | III | 3303.7 | 11.2 | -- | -- |
| CHCAMS-095 | CHCAMS | Male   | 60 | Rectum | III | 3290.0 | 1.2  | -- | -- |
| CHCAMS-096 | CHCAMS | Male   | 45 | Rectum | III | 3659.4 | 12.4 | -- | -- |
| CHCAMS-097 | CHCAMS | Male   | 70 | Rectum | III | 4865.8 | 19.2 | -- | -- |
| CHCAMS-098 | CHCAMS | Female | 58 | Rectum | III | 2317.2 | 17.8 | -- | -- |
| CHCAMS-099 | CHCAMS | Female | 56 | Rectum | III | 2638.4 | 16.2 | -- | -- |
| CHCAMS-100 | CHCAMS | Female | 50 | Rectum | III | 3404.0 | 9.6  | -- | -- |
| CHCAMS-101 | CHCAMS | Male   | 56 | Rectum | II  | 3548.5 | 17.9 | -- | -- |
| CHCAMS-102 | CHCAMS | Female | 62 | Rectum | III | 4870.8 | 2.4  | -- | -- |
| SYSUCC-001 | SYSUCC | Female | 70 | Colon  | IV  | 3105.8 | 7.5  | -- | -- |
| SYSUCC-002 | SYSUCC | Female | 43 | Colon  | I   | 2166.7 | 2.9  | -- | -- |
| SYSUCC-003 | SYSUCC | Female | 61 | Colon  | IV  | 1622.8 | 12.2 | -- | -- |
| SYSUCC-004 | SYSUCC | Male   | 37 | Rectum | II  | 1292.7 | 21.5 | -- | -- |
| SYSUCC-005 | SYSUCC | Female | 41 | Rectum | II  | 2148.1 | 8.0  | -- | -- |

|            |        |        |    |        |     |        |      |    |    |
|------------|--------|--------|----|--------|-----|--------|------|----|----|
| SYSUCC-006 | SYSUCC | Male   | 78 | Rectum | II  | 1931.8 | 14.5 | -- | -- |
| SYSUCC-007 | SYSUCC | Female | 69 | Rectum | II  | 4983.3 | 18.7 | -- | -- |
| SYSUCC-008 | SYSUCC | Female | 39 | Rectum | II  | 2146.8 | 8.4  | -- | -- |
| SYSUCC-009 | SYSUCC | Male   | 57 | Colon  | II  | 4646.3 | 3.0  | -- | -- |
| SYSUCC-010 | SYSUCC | Male   | 73 | Colon  | II  | 2194.2 | 9.2  | -- | -- |
| SYSUCC-011 | SYSUCC | Female | 54 | Rectum | I   | 2821.1 | 14.0 | -- | -- |
| SYSUCC-012 | SYSUCC | Male   | 60 | Colon  | IV  | 2019.1 | 9.5  | -- | -- |
| SYSUCC-013 | SYSUCC | Male   | 68 | Colon  | IV  | 2384.3 | 7.7  | -- | -- |
| SYSUCC-014 | SYSUCC | Male   | 65 | Rectum | I   | 1715.1 | 14.9 | -- | -- |
| SYSUCC-015 | SYSUCC | Female | 80 | Rectum | I   | 1246.4 | 5.9  | -- | -- |
| SYSUCC-016 | SYSUCC | Male   | 40 | Colon  | IV  | 4120.5 | 8.4  | -- | -- |
| SYSUCC-017 | SYSUCC | Male   | 38 | Colon  | IV  | 1206.7 | 14.3 | -- | -- |
| SYSUCC-018 | SYSUCC | Female | 72 | Colon  | III | 3195.3 | 8.5  | -- | -- |
| SYSUCC-019 | SYSUCC | Male   | 72 | Colon  | IV  | 1233.4 | 22.6 | -- | -- |
| SYSUCC-020 | SYSUCC | Female | 60 | Rectum | IV  | 3142.9 | 10.2 | -- | -- |
| SYSUCC-021 | SYSUCC | Female | 73 | Colon  | I   | 3496.1 | 9.8  | -- | -- |
| SYSUCC-022 | SYSUCC | Female | 45 | Colon  | I   | 2358.8 | 10.4 | -- | -- |
| SYSUCC-023 | SYSUCC | Male   | 69 | Rectum | IV  | 1842.2 | 4.2  | -- | -- |
| SYSUCC-024 | SYSUCC | Male   | 47 | Colon  | IV  | 4082.7 | 9.8  | -- | -- |
| SYSUCC-025 | SYSUCC | Female | 78 | Colon  | I   | 1314.1 | 1.9  | -- | -- |
| SYSUCC-026 | SYSUCC | Male   | 60 | Rectum | I   | 2452.9 | 6.4  | -- | -- |
| SYSUCC-027 | SYSUCC | Male   | 59 | Rectum | I   | 1878.9 | 13.9 | -- | -- |
| SYSUCC-028 | SYSUCC | Male   | 72 | Rectum | II  | 3277.8 | 14.8 | -- | -- |
| SYSUCC-029 | SYSUCC | Male   | 75 | Rectum | IV  | 3725.6 | 19.1 | -- | -- |
| SYSUCC-030 | SYSUCC | Male   | 72 | Rectum | II  | 2178.9 | 11.2 | -- | -- |
| SYSUCC-031 | SYSUCC | Male   | 58 | Colon  | IV  | 2540.5 | 4.2  | -- | -- |
| SYSUCC-032 | SYSUCC | Male   | 72 | Colon  | IV  | 2342.2 | 8.1  | -- | -- |
| SYSUCC-033 | SYSUCC | Female | 57 | Rectum | II  | 1370.9 | 10.0 | -- | -- |
| SYSUCC-034 | SYSUCC | Female | 52 | Rectum | IV  | 2797.0 | 15.9 | -- | -- |
| SYSUCC-035 | SYSUCC | Female | 36 | Rectum | III | 3041.3 | 9.9  | -- | -- |
| SYSUCC-036 | SYSUCC | Male   | 54 | Rectum | IV  | 1253.2 | 6.0  | -- | -- |
| SYSUCC-037 | SYSUCC | Male   | 46 | Rectum | III | 1999.5 | 14.1 | -- | -- |
| SYSUCC-038 | SYSUCC | Female | 61 | Rectum | III | 1468.8 | 14.3 | -- | -- |
| SYSUCC-039 | SYSUCC | Male   | 62 | Rectum | III | 1534.1 | 15.0 | -- | -- |
| SYSUCC-040 | SYSUCC | Male   | 54 | Rectum | III | 3390.4 | 11.8 | -- | -- |
| SYSUCC-041 | SYSUCC | Male   | 60 | Rectum | IV  | 2000.0 | 17.1 | -- | -- |
| SYSUCC-042 | SYSUCC | Female | 71 | Rectum | III | 1280.1 | 14.8 | -- | -- |
| SYSUCC-043 | SYSUCC | Male   | 49 | Colon  | III | 2642.7 | 11.2 | -- | -- |
| SYSUCC-044 | SYSUCC | Male   | 62 | Colon  | III | 3340.2 | 8.0  | -- | -- |
| SYSUCC-045 | SYSUCC | Male   | 38 | Rectum | IV  | 2868.4 | 11.0 | -- | -- |
| SYSUCC-046 | SYSUCC | Male   | 76 | Colon  | III | 2479.4 | 8.2  | -- | -- |
| SYSUCC-047 | SYSUCC | Female | 60 | Rectum | IV  | 3127.9 | 11.3 | -- | -- |
| SYSUCC-048 | SYSUCC | Male   | 66 | Colon  | III | 2940.5 | 10.4 | -- | -- |
| SYSUCC-049 | SYSUCC | Male   | 71 | Colon  | IV  | 2619.3 | 8.1  | -- | -- |

|            |        |        |    |        |     |        |      |    |    |
|------------|--------|--------|----|--------|-----|--------|------|----|----|
| SYSUCC-050 | SYSUCC | Female | 45 | Colon  | II  | 3032.7 | 20.6 | -- | -- |
| SYSUCC-051 | SYSUCC | Female | 59 | Colon  | IV  | 1382.0 | 6.7  | -- | -- |
| SYSUCC-052 | SYSUCC | Male   | 62 | Rectum | IV  | 2762.3 | 6.0  | -- | -- |
| SYSUCC-053 | SYSUCC | Female | 54 | Rectum | IV  | 2375.0 | 13.5 | -- | -- |
| SYSUCC-054 | SYSUCC | Male   | 72 | Colon  | III | 2280.4 | 11.0 | -- | -- |
| SYSUCC-055 | SYSUCC | Male   | 40 | Rectum | IV  | 3110.2 | 16.2 | -- | -- |
| SYSUCC-056 | SYSUCC | Female | 71 | Colon  | II  | 1307.2 | 19.9 | -- | -- |
| SYSUCC-057 | SYSUCC | Female | 56 | Colon  | III | 2594.2 | 8.1  | -- | -- |
| SYSUCC-058 | SYSUCC | Male   | 65 | Rectum | III | 2167.1 | 26.6 | -- | -- |
| SYSUCC-059 | SYSUCC | Male   | 46 | Colon  | II  | 1849.9 | 25.5 | -- | -- |
| SYSUCC-060 | SYSUCC | Male   | 36 | Colon  | IV  | 2166.4 | 2.2  | -- | -- |
| SYSUCC-061 | SYSUCC | Female | 67 | Rectum | III | 2489.5 | 10.4 | -- | -- |
| SYSUCC-062 | SYSUCC | Male   | 39 | Colon  | III | 3055.8 | 0.3  | -- | -- |
| SYSUCC-063 | SYSUCC | Female | 30 | Colon  | II  | 2015.9 | 15.0 | -- | -- |
| SYSUCC-064 | SYSUCC | Female | 77 | Colon  | IV  | 3205.4 | 8.6  | -- | -- |
| SYSUCC-065 | SYSUCC | Male   | 63 | Rectum | III | 2627.8 | 19.4 | -- | -- |
| SYSUCC-066 | SYSUCC | Male   | 46 | Rectum | I   | 1879.3 | 17.5 | -- | -- |
| SYSUCC-067 | SYSUCC | Male   | 66 | Colon  | IV  | 3350.1 | 17.5 | -- | -- |
| SYSUCC-068 | SYSUCC | Male   | 44 | Colon  | II  | 1137.8 | 12.3 | -- | -- |
| SYSUCC-069 | SYSUCC | Male   | 69 | Rectum | IV  | 2560.9 | 16.3 | -- | -- |
| SYSUCC-070 | SYSUCC | Male   | 43 | Colon  | IV  | 2081.8 | 7.1  | -- | -- |
| SYSUCC-071 | SYSUCC | Male   | 57 | Colon  | IV  | 2030.8 | 23.5 | -- | -- |
| SYSUCC-072 | SYSUCC | Female | 62 | Colon  | III | 2843.8 | 18.1 | -- | -- |
| SYSUCC-073 | SYSUCC | Male   | 65 | Colon  | III | 6327.6 | 18.4 | -- | -- |
| SYSUCC-074 | SYSUCC | Female | 63 | Rectum | II  | 2318.3 | 22.8 | -- | -- |
| SYSUCC-075 | SYSUCC | Female | 44 | Colon  | III | 2764.3 | 21.4 | -- | -- |
| SYSUCC-076 | SYSUCC | Female | 68 | Rectum | II  | 2969.4 | 7.5  | -- | -- |
| SYSUCC-077 | SYSUCC | Female | 46 | Rectum | III | 5735.3 | 19.6 | -- | -- |
| SYSUCC-078 | SYSUCC | Female | 78 | Rectum | III | 5779.9 | 7.1  | -- | -- |
| SYSUCC-079 | SYSUCC | Female | 61 | Colon  | IV  | 1818.6 | 7.6  | -- | -- |
| SYSUCC-080 | SYSUCC | Male   | 51 | Rectum | III | 2202.2 | 15.9 | -- | -- |
| SYSUCC-081 | SYSUCC | Female | 59 | Rectum | I   | 2663.3 | 3.5  | -- | -- |
| SYSUCC-082 | SYSUCC | Male   | 70 | Colon  | III | 1406.9 | 7.2  | -- | -- |
| SYSUCC-083 | SYSUCC | Male   | 39 | Colon  | II  | 3900.8 | 9.2  | -- | -- |
| SYSUCC-084 | SYSUCC | Male   | 66 | Rectum | III | 1777.9 | 16.8 | -- | -- |
| SYSUCC-085 | SYSUCC | Female | 65 | Rectum | II  | 2414.9 | 11.0 | -- | -- |
| SYSUCC-086 | SYSUCC | Female | 52 | Rectum | IV  | 2539.9 | 15.7 | -- | -- |
| SYSUCC-087 | SYSUCC | Male   | 33 | Colon  | II  | 1337.4 | 4.3  | -- | -- |
| SYSUCC-088 | SYSUCC | Female | 34 | Colon  | II  | 4030.4 | 10.7 | -- | -- |
| SYSUCC-089 | SYSUCC | Female | 74 | Colon  | IV  | 3449.7 | 7.1  | -- | -- |
| SYSUCC-090 | SYSUCC | Female | 58 | Colon  | IV  | 1881.2 | 3.3  | -- | -- |
| SYSUCC-091 | SYSUCC | Male   | 49 | Colon  | II  | 1880.3 | 20.2 | -- | -- |
| SYSUCC-092 | SYSUCC | Male   | 44 | Rectum | III | 2201.3 | 8.6  | -- | -- |
| SYSUCC-093 | SYSUCC | Male   | 77 | Rectum | IV  | 1487.3 | 12.1 | -- | -- |



|            |        |        |    |        |     |        |      |    |    |
|------------|--------|--------|----|--------|-----|--------|------|----|----|
| SYSUCC-094 | SYSUCC | Female | 42 | Rectum | II  | 3132.5 | 12.4 | -- | -- |
| SYSUCC-095 | SYSUCC | Male   | 61 | Rectum | IV  | 3147.1 | 17.9 | -- | -- |
| SYSUCC-096 | SYSUCC | Male   | 59 | Colon  | II  | 1954.1 | 10.8 | -- | -- |
| SYSUCC-097 | SYSUCC | Male   | 54 | Colon  | IV  | 2122.7 | 4.1  | -- | -- |
| SYSUCC-098 | SYSUCC | Male   | 60 | Colon  | IV  | 2469.6 | 21.8 | -- | -- |
| SYSUCC-099 | SYSUCC | Female | 62 | Colon  | III | 2363.4 | 7.1  | -- | -- |
| SYSUCC-100 | SYSUCC | Male   | 76 | Rectum | III | 2043.0 | 8.9  | -- | -- |
| SYSUCC-101 | SYSUCC | Male   | 45 | Rectum | IV  | 2783.4 | 8.8  | -- | -- |
| SYSUCC-102 | SYSUCC | Male   | 62 | Colon  | III | 2416.1 | 5.9  | -- | -- |
| SYSUCC-103 | SYSUCC | Female | 56 | Rectum | III | 2388.6 | 29.5 | -- | -- |
| SYSUCC-104 | SYSUCC | Female | 40 | Colon  | IV  | 1986.1 | 4.9  | -- | -- |
| SYSUCC-105 | SYSUCC | Male   | 59 | Colon  | II  | 2233.0 | 16.9 | -- | -- |
| SYSUCC-106 | SYSUCC | Male   | 52 | Rectum | II  | 2724.2 | 20.5 | -- | -- |
| SYSUCC-107 | SYSUCC | Male   | 74 | Colon  | IV  | 5061.4 | 9.7  | -- | -- |
| SYSUCC-108 | SYSUCC | Male   | 48 | Colon  | IV  | 3372.1 | 7.1  | -- | -- |
| SYSUCC-109 | SYSUCC | Female | 36 | Colon  | III | 3279.5 | 2.5  | -- | -- |
| SYSUCC-110 | SYSUCC | Female | 53 | Colon  | II  | 1948.8 | 11.0 | -- | -- |
| SYSUCC-111 | SYSUCC | Male   | 38 | Colon  | IV  | 3346.0 | 5.7  | -- | -- |
| SYSUCC-112 | SYSUCC | Female | 53 | Colon  | III | 2490.4 | 6.2  | -- | -- |
| SYSUCC-113 | SYSUCC | Female | 55 | Colon  | IV  | 2722.0 | 7.3  | -- | -- |
| SYSUCC-114 | SYSUCC | Female | 45 | Colon  | IV  | 3699.5 | 12.9 | -- | -- |
| SYSUCC-115 | SYSUCC | Male   | 50 | Colon  | IV  | 3277.6 | 11.0 | -- | -- |
| SYSUCC-116 | SYSUCC | Male   | 51 | Colon  | IV  | 3234.5 | 16.8 | -- | -- |
| SYSUCC-117 | SYSUCC | Female | 55 | Colon  | II  | 2860.2 | 7.1  | -- | -- |
| SYSUCC-118 | SYSUCC | Female | 58 | Colon  | IV  | 2532.4 | 8.9  | -- | -- |
| SYSUCC-119 | SYSUCC | Female | 43 | Colon  | IV  | 3412.0 | 11.4 | -- | -- |
| SYSUCC-120 | SYSUCC | Female | 62 | Colon  | IV  | 4587.6 | 7.5  | -- | -- |
| SYSUCC-121 | SYSUCC | Male   | 52 | Rectum | II  | 1699.7 | 23.4 | -- | -- |
| SYSUCC-122 | SYSUCC | Male   | 48 | Rectum | II  | 1416.7 | 21.1 | -- | -- |
| SYSUCC-123 | SYSUCC | Male   | 72 | Rectum | II  | 1142.1 | 7.0  | -- | -- |
| SYSUCC-124 | SYSUCC | Male   | 58 | Rectum | II  | 1559.9 | 2.5  | -- | -- |
| SYSUCC-125 | SYSUCC | Male   | 40 | Rectum | II  | 1179.2 | 17.9 | -- | -- |
| SYSUCC-126 | SYSUCC | Male   | 75 | Rectum | II  | 1281.2 | 4.9  | -- | -- |
| SYSUCC-127 | SYSUCC | Male   | 61 | Rectum | II  | 1410.0 | 7.6  | -- | -- |
| SYSUCC-128 | SYSUCC | Male   | 72 | Rectum | II  | 1327.5 | 14.7 | -- | -- |
| SYSUCC-129 | SYSUCC | Male   | 54 | Rectum | II  | 1818.3 | 4.4  | -- | -- |
| SYSUCC-130 | SYSUCC | Male   | 69 | Rectum | II  | 2210.9 | 9.1  | -- | -- |
| SYSUCC-131 | SYSUCC | Male   | 48 | Rectum | II  | 2187.9 | 8.7  | -- | -- |
| SYSUCC-132 | SYSUCC | Male   | 65 | Rectum | II  | 2847.9 | 8.7  | -- | -- |
| SYSUCC-133 | SYSUCC | Male   | 59 | Rectum | II  | 2631.4 | 9.0  | -- | -- |
| SYSUCC-134 | SYSUCC | Male   | 61 | Rectum | II  | 2350.7 | 27.8 | -- | -- |
| SYSUCC-135 | SYSUCC | Male   | 52 | Rectum | II  | 2120.5 | 7.6  | -- | -- |
| SYSUCC-136 | SYSUCC | Male   | 65 | Rectum | II  | 1373.8 | 14.5 | -- | -- |
| SYSUCC-137 | SYSUCC | Male   | 63 | Rectum | II  | 1259.7 | 3.1  | -- | -- |

|            |        |      |    |        |     |        |      |    |    |
|------------|--------|------|----|--------|-----|--------|------|----|----|
| SYSUCC-138 | SYSUCC | Male | 58 | Rectum | II  | 1235.9 | 17.7 | -- | -- |
| SYSUCC-139 | SYSUCC | Male | 50 | Rectum | II  | 1538.1 | 6.9  | -- | -- |
| SYSUCC-140 | SYSUCC | Male | 60 | Rectum | II  | 2101.4 | 22.6 | -- | -- |
| SYSUCC-141 | SYSUCC | Male | 54 | Rectum | II  | 1949.0 | 28.5 | -- | -- |
| SYSUCC-142 | SYSUCC | Male | 64 | Rectum | II  | 2638.3 | 12.7 | -- | -- |
| SYSUCC-143 | SYSUCC | Male | 34 | Rectum | II  | 2310.7 | 1.2  | -- | -- |
| SYSUCC-144 | SYSUCC | Male | 36 | Rectum | III | 773.8  | 13.5 | -- | -- |
| SYSUCC-145 | SYSUCC | Male | 43 | Rectum | III | 1149.2 | 3.4  | -- | -- |
| SYSUCC-146 | SYSUCC | Male | 55 | Rectum | III | 1380.8 | 3.0  | -- | -- |
| SYSUCC-147 | SYSUCC | Male | 56 | Rectum | III | 1466.2 | 22.1 | -- | -- |
| SYSUCC-148 | SYSUCC | Male | 47 | Rectum | III | 1541.8 | 6.0  | -- | -- |
| SYSUCC-149 | SYSUCC | Male | 62 | Rectum | III | 1495.4 | 11.1 | -- | -- |
| SYSUCC-150 | SYSUCC | Male | 61 | Rectum | III | 1283.6 | 16.2 | -- | -- |
| SYSUCC-151 | SYSUCC | Male | 60 | Rectum | III | 1155.3 | 10.0 | -- | -- |
| SYSUCC-152 | SYSUCC | Male | 41 | Rectum | III | 1238.8 | 7.8  | -- | -- |
| SYSUCC-153 | SYSUCC | Male | 68 | Rectum | III | 1251.7 | 20.7 | -- | -- |
| SYSUCC-154 | SYSUCC | Male | 43 | Rectum | III | 1323.7 | 4.2  | -- | -- |
| SYSUCC-155 | SYSUCC | Male | 58 | Rectum | III | 1811.7 | 15.7 | -- | -- |
| SYSUCC-156 | SYSUCC | Male | 74 | Rectum | III | 1479.8 | 8.4  | -- | -- |
| SYSUCC-157 | SYSUCC | Male | 70 | Rectum | III | 1149.9 | 7.8  | -- | -- |
| SYSUCC-158 | SYSUCC | Male | 60 | Rectum | III | 1708.4 | 12.0 | -- | -- |
| SYSUCC-159 | SYSUCC | Male | 70 | Rectum | III | 1899.5 | 4.1  | -- | -- |
| SYSUCC-160 | SYSUCC | Male | 53 | Rectum | III | 2052.6 | 14.1 | -- | -- |
| SYSUCC-161 | SYSUCC | Male | 65 | Rectum | III | 2090.3 | 12.1 | -- | -- |
| SYSUCC-162 | SYSUCC | Male | 57 | Rectum | III | 2563.5 | 8.2  | -- | -- |
| SYSUCC-163 | SYSUCC | Male | 30 | Rectum | III | 2965.2 | 8.2  | -- | -- |
| SYSUCC-164 | SYSUCC | Male | 73 | Rectum | III | 2577.3 | 20.4 | -- | -- |
| SYSUCC-165 | SYSUCC | Male | 41 | Rectum | III | 2016.6 | 19.2 | -- | -- |
| SYSUCC-166 | SYSUCC | Male | 62 | Rectum | III | 2417.4 | 21.4 | -- | -- |
| SYSUCC-167 | SYSUCC | Male | 49 | Rectum | III | 2636.3 | 4.3  | -- | -- |
| SYSUCC-168 | SYSUCC | Male | 62 | Rectum | III | 2001.9 | 11.4 | -- | -- |
| SYSUCC-169 | SYSUCC | Male | 41 | Rectum | III | 2316.4 | 8.2  | -- | -- |
| SYSUCC-170 | SYSUCC | Male | 56 | Rectum | III | 2405.0 | 12.8 | -- | -- |
| SYSUCC-171 | SYSUCC | Male | 66 | Rectum | III | 2254.5 | 4.5  | -- | -- |
| SYSUCC-172 | SYSUCC | Male | 30 | Rectum | III | 1196.4 | 5.6  | -- | -- |
| SYSUCC-173 | SYSUCC | Male | 66 | Rectum | III | 1180.6 | 11.9 | -- | -- |
| SYSUCC-174 | SYSUCC | Male | 41 | Rectum | III | 1542.3 | 17.5 | -- | -- |
| SYSUCC-175 | SYSUCC | Male | 67 | Rectum | III | 1721.5 | 13.0 | -- | -- |
| SYSUCC-176 | SYSUCC | Male | 34 | Rectum | III | 1324.7 | 11.8 | -- | -- |
| SYSUCC-177 | SYSUCC | Male | 52 | Rectum | III | 1153.2 | 17.2 | -- | -- |
| SYSUCC-178 | SYSUCC | Male | 54 | Rectum | III | 1329.2 | 13.9 | -- | -- |
| SYSUCC-179 | SYSUCC | Male | 56 | Rectum | III | 2347.0 | 16.1 | -- | -- |
| SYSUCC-180 | SYSUCC | Male | 65 | Rectum | III | 1584.4 | 11.3 | -- | -- |
| SYSUCC-181 | SYSUCC | Male | 70 | Rectum | III | 1480.0 | 12.9 | -- | -- |

|            |        |      |    |        |     |        |      |    |    |
|------------|--------|------|----|--------|-----|--------|------|----|----|
| SYSUCC-182 | SYSUCC | Male | 72 | Rectum | III | 1101.3 | 5.7  | -- | -- |
| SYSUCC-183 | SYSUCC | Male | 55 | Rectum | III | 1122.2 | 14.2 | -- | -- |
| SYSUCC-184 | SYSUCC | Male | 71 | Rectum | III | 1371.3 | 11.6 | -- | -- |
| SYSUCC-185 | SYSUCC | Male | 67 | Rectum | III | 1841.7 | 9.4  | -- | -- |
| SYSUCC-186 | SYSUCC | Male | 38 | Rectum | III | 2776.5 | 19.8 | -- | -- |
| SYSUCC-187 | SYSUCC | Male | 77 | Rectum | III | 2126.1 | 13.7 | -- | -- |
| SYSUCC-188 | SYSUCC | Male | 34 | Rectum | III | 2493.8 | 10.3 | -- | -- |
| SYSUCC-189 | SYSUCC | Male | 69 | Rectum | III | 2002.7 | 31.6 | -- | -- |
| SYSUCC-190 | SYSUCC | Male | 23 | Rectum | III | 2752.5 | 9.5  | -- | -- |
| SYSUCC-191 | SYSUCC | Male | 67 | Rectum | III | 2329.6 | 17.7 | -- | -- |
| SYSUCC-192 | SYSUCC | Male | 43 | Rectum | III | 2885.7 | 7.0  | -- | -- |
| SYSUCC-193 | SYSUCC | Male | 67 | Rectum | IV  | 1167.7 | 31.5 | -- | -- |
| SYSUCC-194 | SYSUCC | Male | 60 | Rectum | IV  | 1720.2 | 14.0 | -- | -- |
| SYSUCC-195 | SYSUCC | Male | 53 | Rectum | IV  | 2428.4 | 28.2 | -- | -- |
| SYSUCC-196 | SYSUCC | Male | 60 | Rectum | IV  | 2594.2 | 10.5 | -- | -- |
| SYSUCC-197 | SYSUCC | Male | 60 | Rectum | IV  | 2070.2 | 15.8 | -- | -- |
| SYSUCC-198 | SYSUCC | Male | 48 | Rectum | IV  | 2024.0 | 22.4 | -- | -- |
| SYSUCC-199 | SYSUCC | Male | 75 | Rectum | IV  | 2810.7 | 3.6  | -- | -- |
| SYSUCC-200 | SYSUCC | Male | 56 | Rectum | II  | 1956.4 | 12.9 | -- | -- |
| SYSUCC-201 | SYSUCC | Male | 61 | Rectum | II  | 2246.5 | 5.9  | -- | -- |
| SYSUCC-202 | SYSUCC | Male | 66 | Rectum | II  | 2198.8 | 9.2  | -- | -- |
| SYSUCC-203 | SYSUCC | Male | 67 | Rectum | II  | 2660.1 | 12.1 | -- | -- |
| SYSUCC-204 | SYSUCC | Male | 65 | Rectum | II  | 2728.1 | 24.6 | -- | -- |
| SYSUCC-205 | SYSUCC | Male | 48 | Rectum | II  | 3055.0 | 7.1  | -- | -- |
| SYSUCC-206 | SYSUCC | Male | 65 | Rectum | II  | 2678.8 | 14.8 | -- | -- |
| SYSUCC-207 | SYSUCC | Male | 47 | Rectum | II  | 3237.0 | 8.0  | -- | -- |
| SYSUCC-208 | SYSUCC | Male | 48 | Rectum | II  | 2590.5 | 7.4  | -- | -- |
| SYSUCC-209 | SYSUCC | Male | 66 | Rectum | II  | 2554.5 | 14.6 | -- | -- |
| SYSUCC-210 | SYSUCC | Male | 52 | Rectum | II  | 3200.1 | 5.0  | -- | -- |
| SYSUCC-211 | SYSUCC | Male | 60 | Rectum | II  | 2666.7 | 16.5 | -- | -- |
| SYSUCC-212 | SYSUCC | Male | 59 | Rectum | II  | 2877.9 | 13.7 | -- | -- |
| SYSUCC-213 | SYSUCC | Male | 77 | Rectum | II  | 2918.0 | 12.4 | -- | -- |
| SYSUCC-214 | SYSUCC | Male | 62 | Rectum | II  | 2771.9 | 16.6 | -- | -- |
| SYSUCC-215 | SYSUCC | Male | 50 | Rectum | II  | 3192.8 | 2.5  | -- | -- |
| SYSUCC-216 | SYSUCC | Male | 60 | Rectum | II  | 4523.1 | 6.6  | -- | -- |
| SYSUCC-217 | SYSUCC | Male | 70 | Rectum | II  | 3103.9 | 3.9  | -- | -- |
| SYSUCC-218 | SYSUCC | Male | 32 | Rectum | II  | 2267.0 | 9.7  | -- | -- |
| SYSUCC-219 | SYSUCC | Male | 62 | Rectum | II  | 2767.2 | 12.4 | -- | -- |
| SYSUCC-220 | SYSUCC | Male | 68 | Rectum | II  | 3394.0 | 17.7 | -- | -- |
| SYSUCC-221 | SYSUCC | Male | 61 | Rectum | III | 2069.1 | 11.9 | -- | -- |
| SYSUCC-222 | SYSUCC | Male | 62 | Rectum | III | 2333.8 | 2.4  | -- | -- |
| SYSUCC-223 | SYSUCC | Male | 67 | Rectum | III | 2124.8 | 19.4 | -- | -- |
| SYSUCC-224 | SYSUCC | Male | 71 | Rectum | III | 2073.5 | 7.8  | -- | -- |
| SYSUCC-225 | SYSUCC | Male | 74 | Rectum | III | 2169.0 | 5.1  | -- | -- |

|            |        |        |    |        |     |        |      |    |    |
|------------|--------|--------|----|--------|-----|--------|------|----|----|
| SYSUCC-226 | SYSUCC | Male   | 45 | Rectum | III | 2687.2 | 12.7 | -- | -- |
| SYSUCC-227 | SYSUCC | Male   | 56 | Rectum | III | 2341.6 | 14.5 | -- | -- |
| SYSUCC-228 | SYSUCC | Male   | 66 | Rectum | III | 2304.1 | 3.1  | -- | -- |
| SYSUCC-229 | SYSUCC | Male   | 76 | Rectum | III | 3196.2 | 10.2 | -- | -- |
| SYSUCC-230 | SYSUCC | Male   | 62 | Rectum | III | 2784.9 | 5.4  | -- | -- |
| SYSUCC-231 | SYSUCC | Male   | 82 | Rectum | III | 3096.5 | 15.9 | -- | -- |
| SYSUCC-232 | SYSUCC | Male   | 35 | Rectum | III | 3025.2 | 8.7  | -- | -- |
| SYSUCC-233 | SYSUCC | Male   | 69 | Rectum | III | 2798.1 | 9.9  | -- | -- |
| SYSUCC-234 | SYSUCC | Male   | 32 | Rectum | III | 3248.8 | 3.3  | -- | -- |
| SYSUCC-235 | SYSUCC | Male   | 56 | Rectum | III | 3381.4 | 3.3  | -- | -- |
| SYSUCC-236 | SYSUCC | Male   | 60 | Rectum | III | 3442.6 | 29.3 | -- | -- |
| SYSUCC-237 | SYSUCC | Male   | 56 | Rectum | III | 3315.1 | 5.9  | -- | -- |
| SYSUCC-238 | SYSUCC | Male   | 73 | Rectum | III | 3278.8 | 14.0 | -- | -- |
| SYSUCC-239 | SYSUCC | Male   | 66 | Rectum | III | 3433.6 | 9.5  | -- | -- |
| SYSUCC-240 | SYSUCC | Male   | 52 | Rectum | III | 2787.4 | 9.4  | -- | -- |
| SYSUCC-241 | SYSUCC | Male   | 40 | Rectum | III | 2322.9 | 15.7 | -- | -- |
| SYSUCC-242 | SYSUCC | Male   | 60 | Rectum | III | 2785.8 | 11.3 | -- | -- |
| SYSUCC-243 | SYSUCC | Male   | 76 | Rectum | III | 3167.0 | 2.1  | -- | -- |
| SYSUCC-244 | SYSUCC | Male   | 50 | Rectum | III | 2544.4 | 5.8  | -- | -- |
| SYSUCC-245 | SYSUCC | Male   | 67 | Rectum | III | 2714.4 | 6.4  | -- | -- |
| SYSUCC-246 | SYSUCC | Male   | 60 | Rectum | III | 2221.6 | 10.8 | -- | -- |
| SYSUCC-247 | SYSUCC | Male   | 52 | Rectum | III | 3150.8 | 1.0  | -- | -- |
| SYSUCC-248 | SYSUCC | Male   | 27 | Rectum | III | 3217.1 | 8.4  | -- | -- |
| SYSUCC-249 | SYSUCC | Male   | 60 | Rectum | IV  | 2567.8 | 4.7  | -- | -- |
| SYSUCC-250 | SYSUCC | Male   | 58 | Rectum | IV  | 2282.3 | 9.2  | -- | -- |
| SYSUCC-251 | SYSUCC | Male   | 54 | Rectum | IV  | 2332.2 | 8.0  | -- | -- |
| SYSUCC-252 | SYSUCC | Male   | 49 | Rectum | IV  | 2557.5 | 13.8 | -- | -- |
| SYSUCC-253 | SYSUCC | Male   | 68 | Rectum | IV  | 3280.9 | 10.7 | -- | -- |
| SYSUCC-254 | SYSUCC | Male   | 60 | Rectum | IV  | 2364.8 | 4.2  | -- | -- |
| SYSUCC-255 | SYSUCC | Male   | 58 | Rectum | IV  | 2509.9 | 9.8  | -- | -- |
| SYSUCC-256 | SYSUCC | Male   | 54 | Rectum | IV  | 2276.2 | 14.3 | -- | -- |
| SYSUCC-257 | SYSUCC | Male   | 67 | Rectum | IV  | 2410.5 | 3.6  | -- | -- |
| SYSUCC-258 | SYSUCC | Male   | 68 | Rectum | IV  | 2660.5 | 9.5  | -- | -- |
| SYSUCC-259 | SYSUCC | Male   | 41 | Rectum | IV  | 3559.6 | 9.5  | -- | -- |
| SYSUCC-260 | SYSUCC | Male   | 49 | Rectum | IV  | 3645.3 | 5.0  | -- | -- |
| SYSUCC-261 | SYSUCC | Male   | 54 | Rectum | IV  | 3627.9 | 19.2 | -- | -- |
| SYSUCC-262 | SYSUCC | Male   | 67 | Rectum | IV  | 3085.9 | 20.2 | -- | -- |
| SYSUCC-263 | SYSUCC | Female | 58 | Rectum | II  | 1658.8 | 13.4 | -- | -- |
| SYSUCC-264 | SYSUCC | Female | 58 | Rectum | II  | 2068.9 | 11.1 | -- | -- |
| SYSUCC-265 | SYSUCC | Female | 68 | Rectum | II  | 2216.6 | 22.4 | -- | -- |
| SYSUCC-266 | SYSUCC | Female | 62 | Rectum | II  | 1334.9 | 11.6 | -- | -- |
| SYSUCC-267 | SYSUCC | Female | 59 | Rectum | II  | 2346.6 | 7.7  | -- | -- |
| SYSUCC-268 | SYSUCC | Female | 77 | Rectum | II  | 1901.0 | 11.7 | -- | -- |
| SYSUCC-269 | SYSUCC | Female | 70 | Rectum | II  | 2350.7 | 14.6 | -- | -- |

|            |        |        |    |        |     |        |      |    |    |
|------------|--------|--------|----|--------|-----|--------|------|----|----|
| SYSUCC-270 | SYSUCC | Female | 43 | Rectum | II  | 2726.1 | 10.5 | -- | -- |
| SYSUCC-271 | SYSUCC | Female | 41 | Rectum | III | 2569.7 | 12.4 | -- | -- |
| SYSUCC-272 | SYSUCC | Female | 50 | Rectum | III | 1829.5 | 19.0 | -- | -- |
| SYSUCC-273 | SYSUCC | Female | 32 | Rectum | III | 1706.2 | 25.0 | -- | -- |
| SYSUCC-274 | SYSUCC | Female | 34 | Rectum | III | 1444.4 | 7.6  | -- | -- |
| SYSUCC-275 | SYSUCC | Female | 54 | Rectum | III | 1346.1 | 5.8  | -- | -- |
| SYSUCC-276 | SYSUCC | Female | 63 | Rectum | III | 2723.4 | 4.5  | -- | -- |
| SYSUCC-277 | SYSUCC | Female | 60 | Rectum | III | 3195.2 | 10.6 | -- | -- |
| SYSUCC-278 | SYSUCC | Female | 42 | Rectum | III | 979.2  | 11.8 | -- | -- |
| SYSUCC-279 | SYSUCC | Female | 62 | Rectum | III | 2589.2 | 6.7  | -- | -- |
| SYSUCC-280 | SYSUCC | Female | 25 | Rectum | III | 999.5  | 11.1 | -- | -- |
| SYSUCC-281 | SYSUCC | Female | 65 | Rectum | III | 1102.6 | 6.2  | -- | -- |
| SYSUCC-282 | SYSUCC | Female | 51 | Rectum | III | 1313.6 | 3.7  | -- | -- |
| SYSUCC-283 | SYSUCC | Female | 45 | Rectum | III | 1510.7 | 11.0 | -- | -- |
| SYSUCC-284 | SYSUCC | Female | 45 | Rectum | III | 1155.7 | 14.8 | -- | -- |
| SYSUCC-285 | SYSUCC | Female | 51 | Rectum | III | 1254.5 | 4.6  | -- | -- |
| SYSUCC-286 | SYSUCC | Female | 55 | Rectum | III | 2441.2 | 12.7 | -- | -- |
| SYSUCC-287 | SYSUCC | Female | 41 | Rectum | III | 991.4  | 7.2  | -- | -- |
| SYSUCC-288 | SYSUCC | Female | 70 | Rectum | III | 2815.0 | 11.7 | -- | -- |
| SYSUCC-289 | SYSUCC | Female | 64 | Rectum | IV  | 2403.3 | 6.5  | -- | -- |
| SYSUCC-290 | SYSUCC | Female | 36 | Rectum | IV  | 2075.8 | 3.7  | -- | -- |
| SYSUCC-291 | SYSUCC | Female | 59 | Rectum | II  | 2346.8 | 18.3 | -- | -- |
| SYSUCC-292 | SYSUCC | Female | 35 | Rectum | II  | 2341.6 | 10.8 | -- | -- |
| SYSUCC-293 | SYSUCC | Female | 68 | Rectum | II  | 3201.9 | 14.4 | -- | -- |
| SYSUCC-294 | SYSUCC | Female | 42 | Rectum | II  | 3239.0 | 9.1  | -- | -- |
| SYSUCC-295 | SYSUCC | Female | 69 | Rectum | II  | 2859.6 | 8.5  | -- | -- |
| SYSUCC-296 | SYSUCC | Female | 35 | Rectum | II  | 3271.9 | 16.7 | -- | -- |
| SYSUCC-297 | SYSUCC | Female | 74 | Rectum | II  | 3131.9 | 8.0  | -- | -- |
| SYSUCC-298 | SYSUCC | Female | 65 | Rectum | II  | 3152.2 | 13.1 | -- | -- |
| SYSUCC-299 | SYSUCC | Female | 65 | Rectum | II  | 2580.8 | 9.1  | -- | -- |
| SYSUCC-300 | SYSUCC | Female | 46 | Rectum | II  | 3047.6 | 12.4 | -- | -- |
| SYSUCC-301 | SYSUCC | Female | 41 | Rectum | III | 2739.3 | 18.9 | -- | -- |
| SYSUCC-302 | SYSUCC | Female | 32 | Rectum | III | 2499.5 | 4.3  | -- | -- |
| SYSUCC-303 | SYSUCC | Female | 42 | Rectum | III | 2419.4 | 14.1 | -- | -- |
| SYSUCC-304 | SYSUCC | Female | 48 | Rectum | III | 2403.8 | 14.4 | -- | -- |
| SYSUCC-305 | SYSUCC | Female | 64 | Rectum | III | 2589.6 | 15.6 | -- | -- |
| SYSUCC-306 | SYSUCC | Female | 45 | Rectum | III | 2355.3 | 14.1 | -- | -- |
| SYSUCC-307 | SYSUCC | Female | 30 | Rectum | III | 2871.6 | 2.8  | -- | -- |
| SYSUCC-308 | SYSUCC | Female | 69 | Rectum | III | 2614.7 | 15.5 | -- | -- |
| SYSUCC-309 | SYSUCC | Female | 49 | Rectum | III | 3171.7 | 6.8  | -- | -- |
| SYSUCC-310 | SYSUCC | Female | 67 | Rectum | III | 2614.9 | 12.8 | -- | -- |
| SYSUCC-312 | SYSUCC | Female | 41 | Rectum | III | 2568.0 | 8.4  | -- | -- |
| SYSUCC-313 | SYSUCC | Female | 63 | Rectum | III | 3080.5 | 14.9 | -- | -- |
| SYSUCC-314 | SYSUCC | Female | 71 | Rectum | III | 2750.2 | 11.8 | -- | -- |

|            |        |        |    |        |     |        |      |    |    |
|------------|--------|--------|----|--------|-----|--------|------|----|----|
| SYSUCC-315 | SYSUCC | Female | 72 | Rectum | III | 2871.0 | 6.3  | -- | -- |
| SYSUCC-316 | SYSUCC | Female | 55 | Rectum | III | 2876.8 | 10.8 | -- | -- |
| SYSUCC-317 | SYSUCC | Female | 42 | Rectum | III | 2925.2 | 11.8 | -- | -- |
| SYSUCC-318 | SYSUCC | Female | 67 | Rectum | III | 2897.8 | 4.4  | -- | -- |
| SYSUCC-319 | SYSUCC | Female | 66 | Rectum | III | 3291.5 | 4.9  | -- | -- |
| SYSUCC-320 | SYSUCC | Female | 58 | Rectum | III | 3285.7 | 11.7 | -- | -- |
| SYSUCC-321 | SYSUCC | Female | 66 | Rectum | III | 2526.6 | 1.5  | -- | -- |
| SYSUCC-322 | SYSUCC | Female | 37 | Rectum | III | 2786.3 | 3.5  | -- | -- |
| SYSUCC-323 | SYSUCC | Female | 53 | Rectum | III | 2914.0 | 13.6 | -- | -- |
| SYSUCC-324 | SYSUCC | Female | 19 | Rectum | IV  | 2605.7 | 17.1 | -- | -- |
| SYSUCC-325 | SYSUCC | Female | 67 | Rectum | IV  | 3111.1 | 10.1 | -- | -- |
| SYSUCC-326 | SYSUCC | Female | 60 | Rectum | IV  | 2754.9 | 11.1 | -- | -- |
| SYSUCC-327 | SYSUCC | Male   | 58 | Rectum | III | 2628.5 | 8.8  | -- | -- |
| SYSUCC-328 | SYSUCC | Male   | 49 | Colon  | III | 2357.7 | 4.1  | -- | -- |
| SYSUCC-329 | SYSUCC | Male   | 61 | Colon  | III | 2678.4 | 3.2  | -- | -- |
| SYSUCC-330 | SYSUCC | Male   | 49 | Colon  | IV  | 3301.8 | 8.3  | -- | -- |
| SYSUCC-331 | SYSUCC | Female | 45 | Colon  | IV  | 3169.4 | 2.3  | -- | -- |
| SYSUCC-332 | SYSUCC | Male   | 73 | Rectum | IV  | 3031.2 | 5.7  | -- | -- |
| SYSUCC-333 | SYSUCC | Male   | 65 | Rectum | III | 2609.7 | 2.0  | -- | -- |
| SYSUCC-334 | SYSUCC | Female | 39 | Rectum | III | 2661.3 | 6.9  | -- | -- |
| SYSUCC-335 | SYSUCC | Male   | 61 | Colon  | IV  | 2865.0 | 2.9  | -- | -- |
| SYSUCC-336 | SYSUCC | Male   | 62 | Rectum | IV  | 3805.7 | 1.8  | -- | -- |
| SYSUCC-337 | SYSUCC | Female | 55 | Colon  | III | 2568.8 | 14.5 | -- | -- |
| SYSUCC-338 | SYSUCC | Male   | 49 | Rectum | IV  | 3444.6 | 5.8  | -- | -- |
| SYSUCC-339 | SYSUCC | Male   | 69 | Rectum | I   | 1438.6 | 12.0 | -- | -- |
| SYSUCC-340 | SYSUCC | Female | 69 | Colon  | III | 2448.8 | 5.3  | -- | -- |
| SYSUCC-341 | SYSUCC | Male   | 64 | Colon  | I   | 1188.3 | 9.2  | -- | -- |
| SYSUCC-342 | SYSUCC | Female | 45 | Colon  | III | 2830.4 | 29.7 | -- | -- |
| SYSUCC-343 | SYSUCC | Male   | 35 | Colon  | III | 3089.4 | 3.4  | -- | -- |
| SYSUCC-344 | SYSUCC | Male   | 59 | Colon  | IV  | 3121.6 | 1.1  | -- | -- |
| SYSUCC-345 | SYSUCC | Female | 59 | Rectum | I   | 1152.4 | 13.0 | -- | -- |
| SYSUCC-346 | SYSUCC | Male   | 56 | Colon  | III | 1251.6 | 5.1  | -- | -- |
| SYSUCC-347 | SYSUCC | Male   | 73 | Colon  | III | 3193.8 | 2.9  | -- | -- |
| SYSUCC-348 | SYSUCC | Male   | 63 | Rectum | III | 2769.2 | 13.7 | -- | -- |
| SYSUCC-349 | SYSUCC | Male   | 64 | Rectum | III | 2749.3 | 11.7 | -- | -- |
| SYSUCC-350 | SYSUCC | Male   | 75 | Rectum | IV  | 2914.6 | 1.4  | -- | -- |
| SYSUCC-351 | SYSUCC | Male   | 57 | Rectum | III | 1217.3 | 15.0 | -- | -- |
| SYSUCC-352 | SYSUCC | Male   | 48 | Rectum | IV  | 6514.3 | 8.1  | -- | -- |
| SYSUCC-353 | SYSUCC | Male   | 37 | Rectum | III | 3920.1 | 5.2  | -- | -- |
| SYSUCC-354 | SYSUCC | Male   | 64 | Rectum | III | 3528.7 | 6.8  | -- | -- |
| SYSUCC-355 | SYSUCC | Female | 68 | Colon  | I   | 1377.2 | 2.0  | -- | -- |
| SYSUCC-356 | SYSUCC | Male   | 62 | Rectum | III | 3126.0 | 2.5  | -- | -- |
| SYSUCC-357 | SYSUCC | Male   | 77 | Rectum | III | 3197.1 | 3.4  | -- | -- |
| SYSUCC-358 | SYSUCC | Female | 45 | Rectum | I   | 1282.4 | 5.7  | -- | -- |

|            |        |        |    |        |     |        |      |    |    |
|------------|--------|--------|----|--------|-----|--------|------|----|----|
| SYSUCC-359 | SYSUCC | Female | 74 | Colon  | I   | 1172.9 | 5.6  | -- | -- |
| SYSUCC-360 | SYSUCC | Female | 68 | Colon  | III | 2760.1 | 5.1  | -- | -- |
| SYSUCC-361 | SYSUCC | Female | 46 | Rectum | III | 1723.7 | 3.3  | -- | -- |
| SYSUCC-362 | SYSUCC | Female | 57 | Colon  | II  | 2053.9 | 19.8 | -- | -- |
| SYSUCC-363 | SYSUCC | Female | 42 | Colon  | III | 4245.7 | 18.4 | -- | -- |
| SYSUCC-364 | SYSUCC | Male   | 49 | Colon  | I   | 1292.8 | 12.1 | -- | -- |
| SYSUCC-365 | SYSUCC | Female | 34 | Rectum | III | 1703.6 | 3.3  | -- | -- |
| SYSUCC-366 | SYSUCC | Male   | 62 | Rectum | II  | 2196.3 | 8.7  | -- | -- |
| SYSUCC-367 | SYSUCC | Male   | 43 | Rectum | III | 2943.7 | 10.4 | -- | -- |
| SYSUCC-368 | SYSUCC | Male   | 54 | Colon  | II  | 2038.1 | 3.9  | -- | -- |
| SYSUCC-369 | SYSUCC | Male   | 57 | Rectum | III | 2628.8 | 9.7  | -- | -- |
| SYSUCC-370 | SYSUCC | Female | 49 | Colon  | III | 4263.9 | 1.0  | -- | -- |
| SYSUCC-371 | SYSUCC | Male   | 31 | Colon  | III | 5164.2 | 22.9 | -- | -- |
| SYSUCC-372 | SYSUCC | Male   | 58 | Rectum | I   | 1339.4 | 6.8  | -- | -- |
| SYSUCC-373 | SYSUCC | Female | 44 | Rectum | I   | 1220.8 | 23.4 | -- | -- |
| SYSUCC-374 | SYSUCC | Female | 50 | Rectum | III | 2861.7 | 23.6 | -- | -- |
| SYSUCC-375 | SYSUCC | Male   | 71 | Rectum | II  | 2262.4 | 13.3 | -- | -- |
| SYSUCC-376 | SYSUCC | Male   | 44 | Rectum | III | 2414.5 | 12.5 | -- | -- |
| SYSUCC-377 | SYSUCC | Female | 65 | Rectum | I   | 1406.0 | 4.1  | -- | -- |
| SYSUCC-378 | SYSUCC | Female | 51 | Colon  | III | 3001.0 | 3.1  | -- | -- |
| SYSUCC-379 | SYSUCC | Male   | 57 | Rectum | II  | 1597.6 | 7.4  | -- | -- |
| SYSUCC-380 | SYSUCC | Female | 70 | Colon  | III | 1942.9 | 5.6  | -- | -- |
| SYSUCC-381 | SYSUCC | Male   | 27 | Colon  | III | 2831.3 | 5.7  | -- | -- |
| SYSUCC-382 | SYSUCC | Female | 53 | Colon  | III | 2333.2 | 0.9  | -- | -- |
| SYSUCC-383 | SYSUCC | Male   | 72 | Rectum | III | 3902.8 | 6.8  | -- | -- |
| SYSUCC-384 | SYSUCC | Male   | 67 | Colon  | III | 2557.6 | 7.5  | -- | -- |
| SYSUCC-385 | SYSUCC | Male   | 43 | Colon  | I   | 870.1  | 15.0 | -- | -- |
| SYSUCC-386 | SYSUCC | Male   | 66 | Rectum | II  | 2047.3 | 5.1  | -- | -- |
| SYSUCC-387 | SYSUCC | Female | 60 | Colon  | III | 2866.7 | 5.0  | -- | -- |
| SYSUCC-388 | SYSUCC | Male   | 56 | Colon  | IV  | 3378.8 | 7.4  | -- | -- |
| SYSUCC-389 | SYSUCC | Male   | 66 | Rectum | III | 2473.1 | 4.6  | -- | -- |
| SYSUCC-390 | SYSUCC | Female | 46 | Colon  | II  | 1765.7 | 3.5  | -- | -- |
| SYSUCC-391 | SYSUCC | Male   | 39 | Rectum | III | 3602.6 | 4.1  | -- | -- |
| SYSUCC-392 | SYSUCC | Male   | 72 | Rectum | III | 2753.9 | 7.3  | -- | -- |
| SYSUCC-393 | SYSUCC | Female | 74 | Colon  | III | 2497.4 | 3.4  | -- | -- |
| SYSUCC-394 | SYSUCC | Female | 63 | Rectum | II  | 2023.6 | 9.1  | -- | -- |
| SYSUCC-395 | SYSUCC | Female | 72 | Colon  | III | 1221.4 | 9.1  | -- | -- |
| SYSUCC-396 | SYSUCC | Male   | 62 | Colon  | II  | 1905.1 | 5.7  | -- | -- |
| SYSUCC-397 | SYSUCC | Male   | 67 | Rectum | III | 1684.6 | 21.0 | -- | -- |
| SYSUCC-398 | SYSUCC | Female | 35 | Rectum | III | 3045.1 | 6.7  | -- | -- |
| SYSUCC-399 | SYSUCC | Male   | 59 | Colon  | III | 1949.2 | 7.7  | -- | -- |
| SYSUCC-400 | SYSUCC | Female | 64 | Rectum | III | 2536.9 | 2.5  | -- | -- |
| SYSUCC-401 | SYSUCC | Male   | 56 | Colon  | II  | 1646.6 | 1.2  | -- | -- |
| SYSUCC-402 | SYSUCC | Female | 39 | Colon  | II  | 1650.9 | 3.5  | -- | -- |

|            |        |        |    |        |     |        |      |    |    |
|------------|--------|--------|----|--------|-----|--------|------|----|----|
| SYSUCC-403 | SYSUCC | Female | 60 | Rectum | III | 3671.6 | 3.4  | -- | -- |
| SYSUCC-404 | SYSUCC | Male   | 65 | Rectum | III | 2599.6 | 6.0  | -- | -- |
| SYSUCC-405 | SYSUCC | Male   | 39 | Colon  | III | 4512.3 | 9.5  | -- | -- |
| SYSUCC-406 | SYSUCC | Male   | 55 | Colon  | III | 2652.0 | 9.2  | -- | -- |
| SYSUCC-407 | SYSUCC | Male   | 59 | Rectum | III | 2393.9 | 2.3  | -- | -- |
| SYSUCC-408 | SYSUCC | Male   | 59 | Rectum | II  | 1685.8 | 9.8  | -- | -- |
| SYSUCC-409 | SYSUCC | Male   | 53 | Rectum | III | 2530.8 | 1.3  | -- | -- |
| SYSUCC-410 | SYSUCC | Male   | 79 | Rectum | III | 1491.0 | 6.3  | -- | -- |
| SYSUCC-411 | SYSUCC | Male   | 57 | Colon  | II  | 1164.9 | 5.2  | -- | -- |
| SYSUCC-412 | SYSUCC | Male   | 68 | Rectum | II  | 1987.7 | 6.1  | -- | -- |
| SYSUCC-413 | SYSUCC | Female | 49 | Colon  | III | 2818.6 | 3.4  | -- | -- |
| SYSUCC-414 | SYSUCC | Male   | 53 | Rectum | III | 1475.3 | 3.0  | -- | -- |
| SYSUCC-415 | SYSUCC | Female | 48 | Rectum | III | 2798.2 | 4.7  | -- | -- |
| SYSUCC-416 | SYSUCC | Female | 61 | Colon  | II  | 1525.7 | 23.6 | -- | -- |
| SYSUCC-417 | SYSUCC | Female | 74 | Rectum | I   | 1087.0 | 7.0  | -- | -- |
| SYSUCC-418 | SYSUCC | Male   | 62 | Rectum | II  | 2205.9 | 5.0  | -- | -- |
| SYSUCC-419 | SYSUCC | Female | 59 | Rectum | II  | 2106.0 | 17.6 | -- | -- |
| SYSUCC-420 | SYSUCC | Male   | 66 | Rectum | II  | 2205.7 | 8.3  | -- | -- |
| SYSUCC-421 | SYSUCC | Female | 47 | Rectum | III | 1863.4 | 6.8  | -- | -- |
| SYSUCC-422 | SYSUCC | Female | 57 | Colon  | III | 3133.6 | 1.0  | -- | -- |
| SYSUCC-423 | SYSUCC | Female | 56 | Colon  | III | 2673.9 | 29.9 | -- | -- |
| SYSUCC-424 | SYSUCC | Male   | 54 | Colon  | II  | 2226.9 | 5.9  | -- | -- |
| SYSUCC-425 | SYSUCC | Female | 70 | Colon  | II  | 1767.9 | 3.0  | -- | -- |
| SYSUCC-426 | SYSUCC | Male   | 62 | Rectum | III | 2898.5 | 4.9  | -- | -- |
| SYSUCC-427 | SYSUCC | Male   | 52 | Rectum | II  | 2069.2 | 2.4  | -- | -- |
| SYSUCC-428 | SYSUCC | Male   | 57 | Colon  | II  | 901.0  | 4.9  | -- | -- |
| SYSUCC-429 | SYSUCC | Female | 44 | Rectum | III | 2540.6 | 2.1  | -- | -- |
| SYSUCC-430 | SYSUCC | Male   | 33 | Rectum | III | 2640.2 | 7.9  | -- | -- |
| SYSUCC-431 | SYSUCC | Male   | 34 | Colon  | II  | 2036.7 | 6.6  | -- | -- |
| SYSUCC-432 | SYSUCC | Male   | 63 | Colon  | III | 3086.0 | 9.7  | -- | -- |
| SYSUCC-433 | SYSUCC | Male   | 71 | Colon  | III | 2289.5 | 16.6 | -- | -- |
| SYSUCC-434 | SYSUCC | Female | 57 | Rectum | III | 1718.4 | 7.3  | -- | -- |
| SYSUCC-435 | SYSUCC | Male   | 60 | Rectum | III | 2815.2 | 4.4  | -- | -- |
| SYSUCC-436 | SYSUCC | Female | 54 | Colon  | III | 2774.4 | 12.4 | -- | -- |
| SYSUCC-437 | SYSUCC | Female | 70 | Colon  | III | 2868.8 | 7.8  | -- | -- |
| SYSUCC-438 | SYSUCC | Female | 54 | Colon  | II  | 2326.6 | 12.8 | -- | -- |
| SYSUCC-439 | SYSUCC | Female | 70 | Colon  | III | 3727.2 | 0.8  | -- | -- |
| SYSUCC-440 | SYSUCC | Male   | 33 | Colon  | II  | 1710.0 | 12.0 | -- | -- |
| SYSUCC-441 | SYSUCC | Female | 55 | Colon  | II  | 2094.6 | 7.5  | -- | -- |
| SYSUCC-442 | SYSUCC | Male   | 47 | Colon  | II  | 1931.6 | 1.6  | -- | -- |
| SYSUCC-443 | SYSUCC | Female | 38 | Colon  | III | 2183.6 | 13.1 | -- | -- |
| SYSUCC-444 | SYSUCC | Female | 62 | Colon  | II  | 2225.0 | 5.0  | -- | -- |
| SYSUCC-445 | SYSUCC | Male   | 51 | Rectum | III | 2820.7 | 0.9  | -- | -- |
| SYSUCC-446 | SYSUCC | Female | 59 | Colon  | II  | 2047.8 | 4.9  | -- | -- |



|            |        |        |    |        |     |        |      |    |    |
|------------|--------|--------|----|--------|-----|--------|------|----|----|
| SYSUCC-447 | SYSUCC | Female | 56 | Colon  | III | 3419.9 | 9.4  | -- | -- |
| SYSUCC-448 | SYSUCC | Male   | 63 | Rectum | III | 2494.0 | 4.2  | -- | -- |
| SYSUCC-449 | SYSUCC | Male   | 48 | Rectum | III | 2824.3 | 9.2  | -- | -- |
| SYSUCC-450 | SYSUCC | Male   | 29 | Rectum | III | 2604.2 | 3.5  | -- | -- |
| SYSUCC-451 | SYSUCC | Male   | 61 | Colon  | III | 2223.0 | 4.3  | -- | -- |
| SYSUCC-452 | SYSUCC | Male   | 46 | Colon  | II  | 2239.5 | 15.5 | -- | -- |
| SYSUCC-453 | SYSUCC | Female | 38 | Colon  | IV  | 3073.4 | 9.8  | -- | -- |
| SYSUCC-454 | SYSUCC | Female | 54 | Colon  | III | 1994.5 | 6.9  | -- | -- |
| SYSUCC-455 | SYSUCC | Male   | 75 | Colon  | III | 1895.9 | 16.2 | -- | -- |
| SYSUCC-456 | SYSUCC | Male   | 40 | Rectum | II  | 1793.1 | 8.8  | -- | -- |
| SYSUCC-457 | SYSUCC | Female | 47 | Rectum | II  | 1884.7 | 3.9  | -- | -- |
| SYSUCC-458 | SYSUCC | Male   | 78 | Colon  | II  | 1837.2 | 4.0  | -- | -- |
| SYSUCC-459 | SYSUCC | Male   | 60 | Rectum | II  | 2176.5 | 4.6  | -- | -- |
| SYSUCC-460 | SYSUCC | Female | 54 | Colon  | III | 1887.8 | 8.0  | -- | -- |
| SYSUCC-461 | SYSUCC | Female | 54 | Colon  | III | 4104.2 | 7.3  | -- | -- |
| SYSUCC-462 | SYSUCC | Male   | 65 | Colon  | II  | 2750.7 | 6.2  | -- | -- |
| SYSUCC-463 | SYSUCC | Male   | 53 | Colon  | II  | 2228.9 | 7.1  | -- | -- |
| SYSUCC-464 | SYSUCC | Female | 55 | Colon  | III | 2937.2 | 3.7  | -- | -- |
| SYSUCC-465 | SYSUCC | Male   | 69 | Rectum | II  | 2095.7 | 6.2  | -- | -- |
| SYSUCC-466 | SYSUCC | Female | 62 | Rectum | III | 2265.1 | 1.6  | -- | -- |
| SYSUCC-467 | SYSUCC | Female | 52 | Rectum | I   | 1224.9 | 5.5  | -- | -- |
| SYSUCC-468 | SYSUCC | Female | 63 | Rectum | II  | 1904.6 | 5.6  | -- | -- |
| SYSUCC-469 | SYSUCC | Male   | 52 | Colon  | II  | 1835.4 | 3.5  | -- | -- |
| SYSUCC-470 | SYSUCC | Male   | 49 | Rectum | II  | 1750.9 | 14.9 | -- | -- |
| SYSUCC-471 | SYSUCC | Female | 57 | Colon  | II  | 1673.2 | 4.4  | -- | -- |
| SYSUCC-472 | SYSUCC | Male   | 56 | Colon  | II  | 2083.0 | 10.7 | -- | -- |
| SYSUCC-473 | SYSUCC | Female | 31 | Colon  | III | 2718.9 | 14.1 | -- | -- |
| SYSUCC-474 | SYSUCC | Male   | 60 | Colon  | III | 2654.6 | 20.9 | -- | -- |
| SYSUCC-475 | SYSUCC | Female | 59 | Colon  | II  | 1851.1 | 7.8  | -- | -- |
| SYSUCC-476 | SYSUCC | Female | 61 | Rectum | II  | 1622.2 | 1.3  | -- | -- |
| SYSUCC-477 | SYSUCC | Female | 65 | Colon  | III | 1922.5 | 15.1 | -- | -- |
| SYSUCC-478 | SYSUCC | Male   | 48 | Colon  | II  | 1649.2 | 8.8  | -- | -- |
| SYSUCC-479 | SYSUCC | Male   | 41 | Colon  | II  | 2013.4 | 8.2  | -- | -- |
| SYSUCC-480 | SYSUCC | Female | 47 | Colon  | III | 3153.6 | 12.3 | -- | -- |
| SYSUCC-481 | SYSUCC | Male   | 57 | Colon  | II  | 1542.2 | 8.7  | -- | -- |
| SYSUCC-482 | SYSUCC | Female | 57 | Rectum | II  | 1969.3 | 8.8  | -- | -- |
| SYSUCC-483 | SYSUCC | Female | 60 | Rectum | III | 3054.8 | 4.9  | -- | -- |
| SYSUCC-484 | SYSUCC | Female | 55 | Rectum | III | 2393.7 | 19.6 | -- | -- |
| SYSUCC-485 | SYSUCC | Male   | 42 | Rectum | III | 2798.8 | 11.8 | -- | -- |
| SYSUCC-486 | SYSUCC | Female | 29 | Rectum | II  | 2018.9 | 17.7 | -- | -- |
| SYSUCC-487 | SYSUCC | Female | 42 | Rectum | II  | 1507.5 | 0.1  | -- | -- |
| SYSUCC-488 | SYSUCC | Male   | 56 | Colon  | III | 2001.4 | 8.5  | -- | -- |
| SYSUCC-489 | SYSUCC | Female | 50 | Rectum | II  | 2091.4 | 5.6  | -- | -- |
| SYSUCC-490 | SYSUCC | Male   | 37 | Colon  | III | 2965.0 | 5.7  | -- | -- |

|            |        |        |    |        |     |        |      |    |    |
|------------|--------|--------|----|--------|-----|--------|------|----|----|
| SYSUCC-491 | SYSUCC | Male   | 48 | Rectum | II  | 2044.6 | 9.1  | -- | -- |
| SYSUCC-492 | SYSUCC | Female | 59 | Rectum | III | 2856.7 | 2.1  | -- | -- |
| SYSUCC-493 | SYSUCC | Female | 71 | Colon  | II  | 2331.4 | 7.3  | -- | -- |
| SYSUCC-494 | SYSUCC | Male   | 58 | Rectum | IV  | 3074.1 | 4.7  | -- | -- |
| SYSUCC-495 | SYSUCC | Male   | 76 | Colon  | IV  | 3133.8 | 6.9  | -- | -- |
| SYSUCC-496 | SYSUCC | Female | 53 | Rectum | III | 2638.6 | 1.5  | -- | -- |
| SYSUCC-497 | SYSUCC | Male   | 52 | Colon  | III | 2344.7 | 4.8  | -- | -- |
| SYSUCC-498 | SYSUCC | Male   | 63 | Colon  | II  | 1675.5 | 8.6  | -- | -- |
| SYSUCC-499 | SYSUCC | Male   | 43 | Colon  | III | 2728.9 | 2.8  | -- | -- |
| SYSUCC-500 | SYSUCC | Male   | 62 | Rectum | II  | 1864.7 | 1.1  | -- | -- |
| SYSUCC-501 | SYSUCC | Female | 70 | Colon  | III | 2144.8 | 7.3  | -- | -- |
| SYSUCC-502 | SYSUCC | Male   | 63 | Colon  | II  | 2030.6 | 5.6  | -- | -- |
| SYSUCC-503 | SYSUCC | Male   | 51 | Colon  | III | 2547.3 | 6.1  | -- | -- |
| SYSUCC-504 | SYSUCC | Male   | 66 | Rectum | III | 2825.9 | 7.7  | -- | -- |
| SYSUCC-505 | SYSUCC | Male   | 46 | Colon  | II  | 1863.9 | 9.1  | -- | -- |
| SYSUCC-506 | SYSUCC | Male   | 35 | Rectum | II  | 2224.5 | 2.9  | -- | -- |
| SYSUCC-507 | SYSUCC | Male   | 33 | Rectum | II  | 1611.1 | 2.6  | -- | -- |
| SYSUCC-508 | SYSUCC | Male   | 83 | Rectum | III | 3346.4 | 11.5 | -- | -- |
| SYSUCC-509 | SYSUCC | Male   | 73 | Colon  | II  | 1719.4 | 7.9  | -- | -- |
| SYSUCC-510 | SYSUCC | Female | 54 | Colon  | I   | 1325.3 | 1.6  | -- | -- |
| SYSUCC-511 | SYSUCC | Male   | 54 | Colon  | II  | 2137.8 | 7.8  | -- | -- |
| SYSUCC-512 | SYSUCC | Female | 60 | Rectum | III | 3325.7 | 14.6 | -- | -- |
| SYSUCC-513 | SYSUCC | Male   | 63 | Rectum | I   | 1424.1 | 6.8  | -- | -- |
| SYSUCC-514 | SYSUCC | Female | 56 | Rectum | III | 3277.5 | 7.4  | -- | -- |
| SYSUCC-515 | SYSUCC | Male   | 58 | Rectum | III | 1966.9 | 3.6  | -- | -- |
| SYSUCC-516 | SYSUCC | Male   | 63 | Colon  | II  | 1884.0 | 1.5  | -- | -- |
| SYSUCC-517 | SYSUCC | Male   | 50 | Colon  | III | 1952.2 | 5.1  | -- | -- |
| SYSUCC-518 | SYSUCC | Female | 54 | Rectum | III | 2518.8 | 4.5  | -- | -- |
| SYSUCC-519 | SYSUCC | Male   | 60 | Colon  | III | 2212.0 | 6.6  | -- | -- |
| SYSUCC-520 | SYSUCC | Female | 70 | Colon  | II  | 1133.2 | 3.7  | -- | -- |
| SYSUCC-521 | SYSUCC | Male   | 67 | Colon  | II  | 1811.6 | 1.8  | -- | -- |
| SYSUCC-522 | SYSUCC | Male   | 42 | Colon  | I   | 1479.4 | 1.7  | -- | -- |
| SYSUCC-523 | SYSUCC | Male   | 41 | Rectum | III | 2786.4 | 22.8 | -- | -- |
| SYSUCC-524 | SYSUCC | Male   | 55 | Colon  | II  | 1714.3 | 2.4  | -- | -- |
| SYSUCC-525 | SYSUCC | Female | 29 | Colon  | II  | 1834.9 | 28.3 | -- | -- |
| SYSUCC-526 | SYSUCC | Male   | 59 | Rectum | I   | 1381.3 | 10.3 | -- | -- |
| SYSUCC-527 | SYSUCC | Male   | 74 | Rectum | II  | 1108.1 | 7.9  | -- | -- |
| SYSUCC-528 | SYSUCC | Female | 64 | Rectum | III | 2611.1 | 9.5  | -- | -- |
| SYSUCC-529 | SYSUCC | Female | 51 | Rectum | II  | 1769.1 | 14.1 | -- | -- |
| SYSUCC-530 | SYSUCC | Male   | 34 | Colon  | I   | 1283.5 | 3.3  | -- | -- |
| SYSUCC-531 | SYSUCC | Male   | 66 | Rectum | III | 4035.1 | 10.4 | -- | -- |
| SYSUCC-532 | SYSUCC | Male   | 54 | Rectum | III | 4673.6 | 5.9  | -- | -- |
| SYSUCC-533 | SYSUCC | Male   | 57 | Colon  | III | 2799.5 | 4.1  | -- | -- |
| SYSUCC-534 | SYSUCC | Male   | 56 | Colon  | IV  | 3290.9 | 5.1  | -- | -- |

|            |        |        |    |        |     |        |      |    |    |
|------------|--------|--------|----|--------|-----|--------|------|----|----|
| SYSUCC-535 | SYSUCC | Female | 38 | Rectum | IV  | 3358.9 | 6.2  | -- | -- |
| SYSUCC-536 | SYSUCC | Male   | 58 | Colon  | III | 1977.8 | 8.5  | -- | -- |
| SYSUCC-537 | SYSUCC | Female | 40 | Colon  | III | 3148.1 | 1.5  | -- | -- |
| SYSUCC-538 | SYSUCC | Male   | 47 | Colon  | IV  | 3465.3 | 15.0 | -- | -- |
| SYSUCC-539 | SYSUCC | Male   | 53 | Rectum | III | 2234.5 | 7.3  | -- | -- |
| SYSUCC-540 | SYSUCC | Male   | 51 | Rectum | III | 2367.1 | 4.9  | -- | -- |
| SYSUCC-541 | SYSUCC | Female | 41 | Colon  | III | 1979.9 | 4.1  | -- | -- |
| SYSUCC-542 | SYSUCC | Male   | 65 | Rectum | III | 3005.0 | 6.0  | -- | -- |
| SYSUCC-543 | SYSUCC | Female | 56 | Colon  | III | 2430.0 | 13.8 | -- | -- |
| SYSUCC-544 | SYSUCC | Male   | 66 | Rectum | III | 3415.3 | 2.7  | -- | -- |
| SYSUCC-545 | SYSUCC | Male   | 59 | Colon  | III | 2649.7 | 16.5 | -- | -- |
| SYSUCC-546 | SYSUCC | Male   | 70 | Colon  | III | 2344.2 | 2.6  | -- | -- |
| SYSUCC-547 | SYSUCC | Female | 70 | Rectum | III | 3256.4 | 7.6  | -- | -- |
| SYSUCC-548 | SYSUCC | Male   | 45 | Colon  | III | 2635.2 | 7.9  | -- | -- |
| SYSUCC-549 | SYSUCC | Female | 77 | Rectum | III | 2739.8 | 5.9  | -- | -- |
| SYSUCC-550 | SYSUCC | Male   | 64 | Rectum | IV  | 3641.2 | 11.0 | -- | -- |
| SYSUCC-551 | SYSUCC | Female | 46 | Colon  | IV  | 3615.5 | 3.1  | -- | -- |
| SYSUCC-552 | SYSUCC | Female | 67 | Rectum | IV  | 3235.4 | 26.4 | -- | -- |
| SYSUCC-553 | SYSUCC | Female | 31 | Rectum | IV  | 2975.7 | 15.5 | -- | -- |
| SYSUCC-554 | SYSUCC | Male   | 65 | Colon  | IV  | 3228.8 | 2.0  | -- | -- |
| SYSUCC-555 | SYSUCC | Female | 46 | Rectum | IV  | 3025.6 | 10.7 | -- | -- |
| SYSUCC-556 | SYSUCC | Male   | 56 | Rectum | IV  | 3163.0 | 5.4  | -- | -- |
| SYSUCC-557 | SYSUCC | Female | 62 | Colon  | IV  | 3103.7 | 7.8  | -- | -- |
| SYSUCC-558 | SYSUCC | Female | 53 | Colon  | IV  | 3988.6 | 8.6  | -- | -- |
| SYSUCC-559 | SYSUCC | Male   | 46 | Rectum | IV  | 3787.7 | 4.2  | -- | -- |
| SYSUCC-560 | SYSUCC | Male   | 59 | Colon  | IV  | 3165.5 | 7.6  | -- | -- |
| SYSUCC-561 | SYSUCC | Male   | 55 | Rectum | IV  | 3958.9 | 5.2  | -- | -- |

<sup>1</sup>SYSUCC, Sun Yat-sen University Cancer Center (Guangzhou, China); CHCAMS, Cancer Hospital of Chinese Academy of Medical Sciences (Beijing, China)

<sup>2</sup>Mean of triplicate measurements and the standard error of mean (SEM). Serum piR-54265 level was determined from blood of individuals at diagnosis prior to any treatments or after tumor resection in 7 days.

**Table S3.** General characteristics of participants in the nested case-control analysis derived from the Dongfeng-Tongji prospective cohort

| Variable <sup>a</sup>                                | Cases (N=307)      | Controls (N=614) <sup>c</sup> |
|------------------------------------------------------|--------------------|-------------------------------|
| Age (year, mean $\pm$ SD)                            | 66.6 $\pm$ 7.2     | 66.5 $\pm$ 7.0                |
| Sex                                                  |                    |                               |
| Male, N (%)                                          | 170 (55.4)         | 340 (55.4)                    |
| Female, N (%)                                        | 137 (44.6)         | 274 (44.6)                    |
| Smoking status                                       |                    |                               |
| Smoker, N (%)                                        | 110 (35.8)         | 232 (37.9)                    |
| Non-smoker, N (%)                                    | 195 (63.5)         | 380 (62.1)                    |
| Missing                                              | 2 (0.7)            | 0 (0)                         |
| Drinking status                                      |                    |                               |
| Drinker, N (%)                                       | 88 (28.8)          | 187 (30.6)                    |
| Non-drinker, N (%)                                   | 217 (70.9)         | 425 (69.4)                    |
| Missing                                              | 1 (0.3)            | 0 (0)                         |
| Regular physical activity                            |                    |                               |
| Yes, N (%)                                           | 238 (77.5)         | 473 (77.0)                    |
| No, N (%)                                            | 25 (8.2)           | 68 (11.1)                     |
| Missing, N (%)                                       | 44 (14.3)          | 73 (11.9)                     |
| Family history of cancer                             |                    |                               |
| Yes, N (%)                                           | 6 (1.9)            | 24 (3.9)                      |
| No, N (%)                                            | 259 (84.4)         | 512 (83.4)                    |
| Missing, N (%)                                       | 42 (13.7)          | 78 (12.7)                     |
| BMI (kg/m <sup>2</sup> , mean $\pm$ SD) <sup>b</sup> | 25.0 $\pm$ 3.5     | 23.8 $\pm$ 3.3                |
| CEA (ng/mL, IQR)                                     | 1.73 (1.09, 2.81)  | 1.65 (0.94, 2.46)             |
| CA125 (Unit/mL, IQR)                                 | 3.89 (2.35, 7.10)  | 5.10 (2.01, 9.30)             |
| CA19-9 (Unit/mL, IQR)                                | 7.05 (3.85, 14.78) | 7.39 (4.16, 14.05)            |

Abbreviations: BMI, body mass index; IQR, inter-quartile range; SD, standard derivation.

<sup>a</sup>Normally and non-normally distributed variables were presented as mean  $\pm$  SD and median (IQR), respectively. For categorical variables, values were presented as number (percentage).

<sup>b</sup>Eleven cases and 8 controls had missing BMI data.

<sup>c</sup>One control had missing data of CEA, CA125 and CA19-9.

**Table S4.** The accumulated numbers of incident CRC cases diagnosed by years in the prospective Dongfeng-Tongji cohort

| Diagnosed before the date | Cases enrolled between 2008 to 2010 (N=27009) | Cases enrolled in 2013 (N=14120) | Subtotal              |
|---------------------------|-----------------------------------------------|----------------------------------|-----------------------|
| 2009.12.31                | 16                                            | --                               | 16                    |
| 2010.12.31                | 36                                            | --                               | 36                    |
| 2011.12.31                | 66                                            | --                               | 66                    |
| 2012.12.31                | 106                                           | --                               | 106                   |
| 2013.12.31                | 154                                           | 14                               | 168                   |
| 2014.12.31                | 196                                           | 28                               | 224                   |
| 2015.12.31                | 237                                           | 50                               | 287                   |
| 2016.12.31                | 277                                           | 50                               | 327                   |
| 2017.12.31                | 277                                           | 54                               | 331                   |
| 2018.12.31                | 280 (17) <sup>a</sup>                         | 57 (13) <sup>a</sup>             | 337 (30) <sup>a</sup> |

<sup>a</sup>Number in the parenthesis indicates missing serum specimens for some reasons.

**Table S5.** Clinical features and serum piR-54265 levels of the participants in prospective case-control analysis from Dongfeng-Tongji cohort

| Sample ID | Subject <sup>1</sup> | Diagnosis | Diagnosed date | Last follow-up date | Time between enrollment and diagnosis (year) | Age (year) | Sex    | CEA (ng/mL) | CA125 (U/mL) | CA19-9 (U/mL) | BMI   | Smoking Status <sup>2</sup> | Drinking status <sup>3</sup> | Regular physical activity <sup>4</sup> | Family cancer history | piR-54265 <sup>5</sup> |      |
|-----------|----------------------|-----------|----------------|---------------------|----------------------------------------------|------------|--------|-------------|--------------|---------------|-------|-----------------------------|------------------------------|----------------------------------------|-----------------------|------------------------|------|
|           |                      |           |                |                     |                                              |            |        |             |              |               |       |                             |                              |                                        |                       | Mean copy/ $\mu$ L     | SEM  |
| 1         | Case                 | CC        | 2014-07-20     | 2014-07-20          | 1.0                                          | 75         | Female | 0.81        | 2.57         | 12.89         | 27.87 | Yes                         | Yes                          | Missing                                | Missing               | 2479.6                 | 6.6  |
| 2         | Case                 | CC        | 2015-01-13     | 2015-01-13          | 1.1                                          | 57         | Female | 2.11        | 2.75         | 31.36         | 21.93 | No                          | No                           | Yes                                    | No                    | 1556.6                 | 2.1  |
| 3         | Case                 | CC        | 2011-09-15     | 2011-09-15          | 2.9                                          | 62         | Male   | 2.24        | 0.21         | 4.77          | 24.62 | Yes                         | No                           | Yes                                    | No                    | 2227.9                 | 9.7  |
| 4         | Case                 | CC        | 2012-10-10     | 2012-10-10          | 3.7                                          | 75         | Male   | 1.29        | 26.50        | 7.30          | 24.50 | Yes                         | No                           | Yes                                    | No                    | 400.0                  | 5.5  |
| 5         | Case                 | CC        | 2013-11-10     | 2013-11-10          | 4.8                                          | 72         | Male   | 3.57        | 15.10        | 2.00          | 22.73 | No                          | No                           | Yes                                    | No                    | 475.6                  | 7.3  |
| 6         | Case                 | CC        | 2016-11-16     | 2016-11-16          | 3.5                                          | 77         | Female | 2.01        | 3.07         | 17.21         | 20.50 | No                          | No                           | Missing                                | No                    | 1469.8                 | 5.2  |
| 7         | Case                 | CC        | 2013-11-10     | 2013-11-10          | 5.1                                          | 64         | Male   | 0.50        | 4.27         | 11.66         | 23.29 | No                          | No                           | Yes                                    | No                    | 1536.9                 | 17.0 |
| 8         | Case                 | CC        | 2016-03-27     | 2016-03-27          | 2.8                                          | 66         | Male   | 12.27       | 4.16         | 20.02         | 23.52 | No                          | No                           | Missing                                | Missing               | 2769.1                 | 11.7 |
| 9         | Case                 | CC        | 2012-08-24     | 2012-08-24          | 3.5                                          | 70         | Female | 3.64        | 11.40        | 7.75          | 30.00 | No                          | No                           | Yes                                    | No                    | 187.6                  | 8.4  |
| 10        | Case                 | CC        | 2016-05-03     | 2016-05-03          | 2.6                                          | 82         | Male   | 1.27        | 2.68         | 3.9           | 27.42 | Yes                         | No                           | Yes                                    | No                    | 1305.1                 | 7.5  |
| 11        | Case                 | CC        | 2016-08-02     | 2016-08-02          | 2.8                                          | 58         | Male   | 1.33        | 2.59         | 4.89          | 29.46 | Yes                         | No                           | Yes                                    | No                    | 1103.0                 | 1.8  |
| 12        | Case                 | CC        | 2013-07-06     | 2013-07-06          | 0.6                                          | 61         | Male   | 1.00        | 3.25         | 29.7          | 24.23 | No                          | Yes                          | Yes                                    | No                    | 1206.7                 | 4.4  |
| 13        | Case                 | CC        | 2016-05-30     | 2016-05-30          | 2.5                                          | 68         | Male   | 0.85        | 2.47         | 2.39          | 28.06 | Yes                         | Yes                          | Yes                                    | No                    | 668.8                  | 8.3  |
| 14        | Case                 | CC        | 2016-12-03     | 2016-12-03          | 3.1                                          | 71         | Female | 1.27        | 3.21         | 4.41          | 27.49 | No                          | No                           | Yes                                    | No                    | 1377.9                 | 1.7  |
| 15        | Case                 | CC        | 2013-11-10     | 2013-11-10          | 0.0                                          | 64         | Male   | 2.10        | 12.62        | 13.88         | 21.01 | Yes                         | Yes                          | Yes                                    | Yes                   | 1627.3                 | 3.1  |
| 16        | Case                 | CC        | 2011-01-07     | 2011-01-07          | 2.2                                          | 74         | Male   | 3.82        | 5.30         | 46.71         | 32.32 | No                          | No                           | Yes                                    | No                    | 1138.6                 | 10.5 |
| 17        | Case                 | CC        | 2010-03-04     | 2010-03-04          | 1.0                                          | 65         | Male   | 2.34        | 0.72         | 26.38         | 18.96 | Yes                         | Yes                          | Yes                                    | No                    | 1750.6                 | 5.5  |
| 18        | Case                 | CC        | 2013-12-12     | 2013-12-12          | 0.0                                          | 63         | Male   | 1.99        | 5.37         | 5.55          | 24.84 | Yes                         | No                           | Yes                                    | No                    | 1453.3                 | 5.3  |
| 19        | Case                 | CC        | 2009-09-13     | 2009-09-13          | 0.9                                          | 55         | Male   | 6.91        | 10.90        | 2.00          | 25.90 | Yes                         | No                           | Yes                                    | No                    | 1311.0                 | 10.3 |
| 20        | Case                 | CC        | 2012-01-06     | 2012-01-06          | 3.2                                          | 70         | Male   | 0.50        | 0.72         | 17.55         | 28.52 | No                          | No                           | Yes                                    | No                    | 1092.8                 | 8.3  |

|    |      |    |            |            |     |    |        |      |       |       |         |         |     |         |         |        |      |
|----|------|----|------------|------------|-----|----|--------|------|-------|-------|---------|---------|-----|---------|---------|--------|------|
| 21 | Case | CC | 2013-11-10 | 2013-11-10 | 5.0 | 71 | Female | 4.01 | 3.26  | 12.80 | 19.04   | No      | No  | No      | No      | 1165.7 | 1.9  |
| 22 | Case | CC | 2015-08-18 | 2015-08-18 | 6.4 | 77 | Female | 6.14 | 0.00  | 19.91 | Missing | No      | Yes | Yes     | No      | 1435.7 | 13.0 |
| 23 | Case | CC | 2015-12-19 | 2015-12-19 | 2.1 | 71 | Male   | 1.28 | 7.89  | 2.32  | 27.61   | Yes     | Yes | Yes     | No      | 1576.5 | 2.6  |
| 24 | Case | CC | 2012-10-20 | 2012-10-20 | 3.9 | 53 | Female | 0.74 | 0.36  | 19.76 | 34.63   | No      | No  | Yes     | No      | 2409.7 | 18.0 |
| 25 | Case | CC | 2011-05-04 | 2011-05-04 | 2.4 | 61 | Male   | 1.02 | 10.40 | 8.76  | 31.23   | Yes     | Yes | Yes     | No      | 370.0  | 6.6  |
| 26 | Case | CC | 2009-11-13 | 2009-11-13 | 0.7 | 71 | Male   | 2.15 | 12.70 | 4.13  | 34.16   | Yes     | No  | Yes     | No      | 1175.5 | 8.6  |
| 27 | Case | CC | 2012-12-26 | 2012-12-26 | 3.8 | 67 | Male   | 1.23 | 6.70  | 2.40  | 23.81   | No      | No  | Yes     | No      | 1066.5 | 6.3  |
| 28 | Case | CC | 2011-03-24 | 2011-03-24 | 2.4 | 66 | Male   | 1.97 | 10.50 | 8.34  | 26.77   | No      | Yes | Yes     | No      | 626.2  | 8.4  |
| 29 | Case | CC | 2012-11-05 | 2012-11-05 | 4.1 | 79 | Female | 2.00 | 3.84  | 0.01  | 21.49   | No      | No  | Yes     | No      | 215.8  | 9.8  |
| 30 | Case | CC | 2011-04-02 | 2011-04-02 | 2.4 | 77 | Female | 1.31 | 12.80 | 7.13  | 28.40   | No      | No  | No      | No      | 1575.7 | 6.8  |
| 31 | Case | CC | 2013-06-13 | 2013-06-13 | 0.6 | 72 | Male   | 5.50 | 13.59 | 30.04 | 26.47   | Yes     | No  | Yes     | No      | 1638.3 | 3.5  |
| 32 | Case | CC | 2013-11-08 | 2013-11-08 | 0.9 | 67 | Male   | 1.58 | 2.93  | 10.19 | 22.41   | Yes     | Yes | No      | No      | 1404.5 | 8.5  |
| 33 | Case | CC | 2015-04-20 | 2015-04-20 | 1.9 | 63 | Male   | 2.05 | 4.16  | 7.8   | 25.39   | No      | No  | Missing | Missing | 5393.8 | 7.7  |
| 34 | Case | CC | 2013-11-10 | 2013-11-10 | 5.0 | 78 | Male   | 2.73 | 6.50  | 7.18  | 24.24   | No      | No  | Yes     | No      | 1404.9 | 17.2 |
| 35 | Case | CC | 2009-07-28 | 2009-07-28 | 0.7 | 61 | Female | 3.75 | 29.90 | 26.68 | 21.70   | No      | No  | Yes     | No      | 1169.9 | 10.7 |
| 36 | Case | CC | 2009-12-16 | 2009-12-16 | 1.2 | 61 | Female | 0.33 | 2.98  | 10.53 | 30.41   | Missing | No  | Yes     | No      | 2025.0 | 12.4 |
| 37 | Case | CC | 2011-01-13 | 2011-01-13 | 2.3 | 61 | Male   | 1.35 | 3.40  | 13.76 | 23.34   | No      | No  | Yes     | No      | 1533.8 | 4.1  |
| 38 | Case | CC | 2010-01-19 | 2010-01-19 | 1.3 | 62 | Female | 2.03 | 3.32  | 14.41 | 26.71   | No      | No  | Yes     | No      | 236.9  | 4.8  |
| 39 | Case | CC | 2015-12-25 | 2015-12-25 | 2.4 | 54 | Female | 0.90 | 3.22  | 3.12  | 27.41   | No      | Yes | Missing | Missing | 2571.7 | 7.2  |
| 40 | Case | CC | 2012-04-25 | 2012-04-25 | 3.3 | 72 | Female | 1.71 | 8.80  | 6.39  | 25.85   | No      | No  | Yes     | No      | 934.1  | 2.4  |
| 41 | Case | CC | 2011-08-01 | 2011-08-01 | 2.8 | 63 | Male   | 0.47 | 2.47  | 2.13  | 26.22   | Yes     | No  | Yes     | No      | 1240.5 | 3.8  |
| 42 | Case | CC | 2016-09-21 | 2016-09-21 | 3.0 | 51 | Female | 0.47 | 2.59  | 5.64  | 23.64   | No      | No  | Yes     | No      | 542.4  | 4.6  |
| 43 | Case | CC | 2013-10-13 | 2013-10-13 | 5.0 | 63 | Male   | 3.07 | 13.90 | 8.78  | 22.53   | No      | No  | Yes     | No      | 1587.8 | 10.5 |
| 44 | Case | CC | 2012-05-05 | 2012-05-05 | 3.4 | 59 | Female | 2.78 | 4.90  | 23.77 | 29.32   | No      | No  | Yes     | No      | 1252.9 | 10.5 |
| 45 | Case | CC | 2011-03-21 | 2011-03-21 | 2.1 | 57 | Female | 0.00 | 0.00  | 0.00  | 24.69   | No      | No  | Yes     | No      | 1705.4 | 14.2 |
| 46 | Case | CC | 2010-07-13 | 2010-07-13 | 1.6 | 59 | Female | 0.21 | 0.66  | 7.05  | 23.83   | No      | No  | Yes     | No      | 352.5  | 4.6  |
| 47 | Case | CC | 2016-09-06 | 2016-09-06 | 3.0 | 81 | Female | 0.73 | 1.46  | 0.00  | 30.73   | No      | No  | Yes     | No      | 2274.3 | 3.6  |
| 48 | Case | CC | 2010-03-31 | 2010-03-31 | 1.3 | 77 | Female | 7.48 | 7.90  | 6.68  | 21.57   | No      | No  | Yes     | No      | 1149.8 | 5.9  |

|    |      |    |            |            |     |    |        |         |       |         |         |     |     |         |         |        |      |
|----|------|----|------------|------------|-----|----|--------|---------|-------|---------|---------|-----|-----|---------|---------|--------|------|
| 49 | Case | CC | 2013-10-18 | 2013-10-18 | 0.8 | 61 | Female | 3.21    | 2.96  | 5.59    | 33.30   | No  | No  | Yes     | No      | 718.0  | 4.3  |
| 50 | Case | CC | 2013-03-19 | 2013-03-19 | 4.2 | 61 | Male   | 4.21    | 2.70  | 16.28   | 25.71   | No  | No  | Yes     | No      | 435.6  | 16.6 |
| 51 | Case | CC | 2015-11-07 | 2015-11-07 | 6.8 | 63 | Male   | 8.27    | 8.30  | 5.69    | 25.97   | Yes | Yes | Yes     | No      | 2285.1 | 18.3 |
| 52 | Case | CC | 2013-10-04 | 2013-10-04 | 4.9 | 57 | Female | 1.18    | 0.59  | 31.91   | 19.95   | No  | No  | Yes     | No      | 1154.5 | 5.6  |
| 53 | Case | CC | 2013-02-18 | 2013-02-18 | 4.4 | 59 | Male   | 0.80    | 0.20  | 5.20    | 23.15   | Yes | No  | Yes     | No      | 1246.7 | 13.8 |
| 54 | Case | CC | 2012-02-28 | 2012-02-28 | 3.3 | 78 | Male   | 2.34    | 8.60  | 13.02   | 24.98   | Yes | Yes | Yes     | No      | 1584.3 | 5.4  |
| 55 | Case | CC | 2016-01-11 | 2016-01-11 | 1.9 | 83 | Female | 0.87    | 15.09 | 3.63    | 30.64   | No  | No  | Yes     | No      | 2136.3 | 2.7  |
| 56 | Case | CC | 2016-08-03 | 2016-08-03 | 2.4 | 80 | Male   | 2.13    | 6.35  | 10.23   | 29.33   | Yes | Yes | Yes     | No      | 1494.2 | 7.2  |
| 57 | Case | CC | 2016-06-18 | 2016-06-18 | 2.5 | 74 | Male   | 1.21    | 2.19  | 4.52    | 25.15   | Yes | Yes | Yes     | No      | 1119.9 | 11.3 |
| 58 | Case | CC | 2009-07-31 | 2009-07-31 | 0.6 | 70 | Male   | 4.11    | 8.60  | 4.48    | 21.09   | No  | No  | Yes     | No      | 3369.3 | 6.8  |
| 59 | Case | CC | 2012-07-30 | 2012-07-30 | 3.6 | 61 | Female | 3.00    | 2.90  | 3.99    | 28.72   | No  | No  | Yes     | No      | 376.3  | 6.6  |
| 60 | Case | CC | 2015-11-30 | 2015-11-30 | 2.1 | 61 | Female | 0.61    | 1.64  | 4.97    | 28.95   | No  | No  | Yes     | No      | 1118.4 | 11.1 |
| 61 | Case | CC | 2009-11-17 | 2009-11-17 | 0.9 | 62 | Male   | 8.17    | 5.50  | 11.29   | 28.88   | Yes | Yes | Yes     | No      | 5398.0 | 8.3  |
| 62 | Case | CC | 2013-11-13 | 2013-11-13 | 0.7 | 75 | Male   | 1089.27 | 6.20  | 2120.69 | 23.25   | Yes | No  | Yes     | No      | 1492.2 | 6.1  |
| 63 | Case | CC | 2012-11-03 | 2012-11-03 | 3.8 | 70 | Female | 1.07    | 5.20  | 4.96    | 23.07   | No  | No  | Yes     | No      | 1705.7 | 9.6  |
| 64 | Case | CC | 2013-07-31 | 2013-07-31 | 4.7 | 63 | Female | 2.73    | 2.18  | 20.15   | 28.67   | No  | Yes | Yes     | No      | 2076.7 | 5.8  |
| 65 | Case | CC | 2011-07-10 | 2011-07-10 | 2.6 | 80 | Male   | 2.33    | 9.60  | 20.98   | 22.03   | No  | Yes | Yes     | No      | 309.5  | 3.1  |
| 66 | Case | CC | 2011-02-15 | 2011-02-15 | 2.3 | 74 | Male   | 1.31    | 0.91  | 22.43   | 24.57   | No  | Yes | Yes     | No      | 1861.1 | 8.5  |
| 67 | Case | CC | 2013-09-18 | 2013-09-18 | 4.9 | 64 | Male   | 0.12    | 0.01  | 5.51    | 25.07   | No  | Yes | Yes     | No      | 1322.9 | 6.2  |
| 68 | Case | CC | 2016-11-07 | 2016-11-07 | 2.9 | 54 | Female | 1.30    | 1.44  | 25.15   | Missing | No  | No  | No      | No      | 603.3  | 3.7  |
| 69 | Case | CC | 2013-07-23 | 2013-07-23 | 4.6 | 66 | Male   | 3.56    | 6.60  | 2.00    | 24.98   | No  | Yes | Yes     | No      | 835.9  | 6.5  |
| 70 | Case | CC | 2012-05-22 | 2012-05-22 | 3.2 | 65 | Female | 1.71    | 9.70  | 2.17    | 23.07   | No  | No  | Yes     | No      | 1408.6 | 7.9  |
| 71 | Case | CC | 2016-03-03 | 2016-03-03 | 2.7 | 80 | Male   | 10.15   | 2.38  | 3.11    | 18.42   | Yes | Yes | Missing | Missing | 1303.5 | 5.3  |
| 72 | Case | CC | 2010-09-28 | 2010-09-28 | 1.9 | 76 | Male   | 2.38    | 2.76  | 0.02    | 27.72   | No  | No  | Yes     | No      | 838.4  | 17.5 |
| 73 | Case | CC | 2011-04-09 | 2011-04-09 | 2.4 | 59 | Female | 0.00    | 0.00  | 0.00    | 26.84   | No  | No  | Yes     | No      | 1360.3 | 6.6  |
| 74 | Case | CC | 2010-09-16 | 2010-09-16 | 1.8 | 68 | Male   | 2.48    | 6.74  | 12.81   | Missing | No  | No  | Yes     | No      | 2042.8 | 7.8  |
| 75 | Case | CC | 2015-08-25 | 2015-08-25 | 1.5 | 76 | Female | 1.31    | 4.76  | 10.06   | 19.40   | No  | No  | Yes     | No      | 1199.5 | 12.3 |
| 76 | Case | CC | 2012-11-01 | 2012-11-01 | 3.7 | 71 | Female | 2.10    | 8.50  | 8.68    | 28.03   | No  | No  | Yes     | No      | 1375.4 | 11.9 |



|     |      |    |            |            |     |    |        |      |       |         |       |     |     |         |         |        |      |
|-----|------|----|------------|------------|-----|----|--------|------|-------|---------|-------|-----|-----|---------|---------|--------|------|
| 77  | Case | CC | 2014-02-15 | 2014-02-15 | 0.8 | 78 | Male   | 1.32 | 3.26  | 7.45    | 24.81 | Yes | Yes | Missing | Missing | 1230.9 | 2.9  |
| 78  | Case | CC | 2014-02-07 | 2014-02-07 | 0.2 | 59 | Female | 1.16 | 5.16  | 2.02    | 26.64 | No  | No  | No      | No      | 1406.8 | 3.7  |
| 79  | Case | CC | 2013-11-19 | 2013-11-19 | 0.2 | 71 | Male   | 6.30 | 5.60  | 22.42   | 19.25 | No  | Yes | Missing | Missing | 1706.7 | 7.8  |
| 80  | Case | CC | 2010-05-28 | 2010-05-28 | 1.5 | 65 | Female | 2.15 | 1.16  | 9.48    | 21.58 | No  | No  | Yes     | No      | 3650.6 | 7.0  |
| 81  | Case | CC | 2011-09-26 | 2011-09-26 | 3.0 | 67 | Female | 0.70 | 7.17  | 7.17    | 26.50 | No  | No  | Yes     | No      | 1484.3 | 1.6  |
| 82  | Case | CC | 2014-01-13 | 2014-01-13 | 0.3 | 59 | Female | 2.27 | 20.24 | 110.06  | 25.39 | No  | No  | Yes     | No      | 3273.7 | 10.4 |
| 83  | Case | CC | 2013-10-10 | 2013-10-10 | 5.0 | 60 | Female | 0.92 | 1.95  | 33.28   | 33.87 | No  | No  | Yes     | No      | 1849.9 | 16.8 |
| 84  | Case | CC | 2011-10-06 | 2011-10-06 | 2.9 | 66 | Male   | 1.63 | 2.41  | 2.78    | 22.86 | No  | No  | Yes     | No      | 3044.7 | 9.0  |
| 85  | Case | CC | 2010-11-21 | 2010-11-21 | 2.1 | 68 | Male   | 8.00 | 2.50  | 30.40   | 25.53 | Yes | Yes | Yes     | No      | 4362.5 | 5.5  |
| 86  | Case | CC | 2013-02-13 | 2013-02-13 | 4.3 | 71 | Female | 0.26 | 3.66  | 21.98   | 30.36 | No  | No  | Yes     | No      | 1439.4 | 4.5  |
| 87  | Case | CC | 2012-05-16 | 2012-05-16 | 3.6 | 73 | Female | 0.90 | 5.40  | 6.60    | 18.38 | No  | No  | Yes     | No      | 2517.2 | 2.8  |
| 88  | Case | CC | 2016-07-21 | 2016-07-21 | 2.6 | 62 | Male   | 2.38 | 3.65  | 8.01    | 25.80 | Yes | No  | Yes     | No      | 1663.3 | 17.5 |
| 89  | Case | CC | 2009-05-14 | 2009-05-14 | 0.4 | 57 | Female | 1.36 | 9.00  | 9.57    | 23.31 | No  | No  | Yes     | No      | 2152.3 | 10.0 |
| 90  | Case | CC | 2015-10-23 | 2015-10-23 | 6.9 | 62 | Male   | 3.87 | 2.35  | 26.26   | 29.12 | No  | No  | Yes     | No      | 1625.2 | 10.3 |
| 91  | Case | CC | 2016-07-21 | 2016-07-21 | 7.8 | 66 | Male   | 0.62 | 2.24  | 6.85    | 24.05 | Yes | No  | Yes     | No      | 2250.7 | 16.6 |
| 92  | Case | CC | 2015-03-23 | 2015-03-23 | 1.4 | 69 | Female | 0.77 | 2.51  | 14.59   | 30.86 | No  | No  | Yes     | Yes     | 2363.1 | 6.9  |
| 93  | Case | CC | 2014-07-21 | 2014-07-21 | 5.7 | 62 | Male   | 2.13 | 4.70  | 6.38    | 23.38 | Yes | Yes | No      | No      | 1392.2 | 5.6  |
| 94  | Case | CC | 2014-09-28 | 2014-09-28 | 0.9 | 65 | Male   | 1.48 | 4.08  | 12.51   | 26.15 | Yes | Yes | Missing | Missing | 1386.6 | 2.2  |
| 95  | Case | CC | 2014-01-09 | 2014-01-09 | 5.3 | 70 | Female | 0.47 | 1.19  | 4.96    | 22.29 | No  | No  | Yes     | No      | 1981.2 | 7.4  |
| 96  | Case | CC | 2014-02-08 | 2014-02-08 | 0.3 | 63 | Female | 3.40 | 2.88  | 3.73    | 25.82 | No  | No  | Yes     | No      | 576.6  | 9.8  |
| 97  | Case | CC | 2015-05-04 | 2015-05-04 | 1.2 | 65 | Male   | 0.70 | 4.96  | 14.69   | 28.34 | No  | No  | Yes     | No      | 1482.9 | 14.2 |
| 98  | Case | CC | 2015-02-03 | 2015-02-03 | 1.1 | 72 | Male   | 3.00 | 6.02  | 3386.38 | 26.51 | No  | No  | Yes     | No      | 3006.3 | 11.4 |
| 99  | Case | CC | 2015-05-11 | 2015-05-11 | 6.6 | 50 | Female | 3.15 | 7.90  | 8.04    | 22.93 | No  | No  | Yes     | No      | 1319.4 | 3.7  |
| 100 | Case | CC | 2015-04-23 | 2015-04-23 | 6.4 | 56 | Female | 3.58 | 8.50  | 45.91   | 23.53 | No  | No  | Yes     | No      | 1617.4 | 5.9  |
| 101 | Case | CC | 2013-12-18 | 2013-12-18 | 5.1 | 64 | Male   | 1.22 | 14.50 | 6.71    | 23.29 | Yes | No  | Yes     | No      | 1706.9 | 4.8  |
| 102 | Case | CC | 2014-09-19 | 2014-09-19 | 1.3 | 62 | Male   | 1.17 | 2.68  | 6.61    | 23.34 | Yes | Yes | Missing | Missing | 1595.8 | 14.4 |
| 103 | Case | CC | 2014-11-05 | 2014-11-05 | 0.7 | 62 | Male   | 2.59 | 9.06  | 0.00    | 23.23 | Yes | No  | Yes     | No      | 525.0  | 10.2 |
| 104 | Case | CC | 2015-10-01 | 2015-10-01 | 2.4 | 55 | Female | 0.68 | 2.44  | 4.41    | 23.83 | No  | Yes | Missing | Missing | 3840.7 | 5.3  |

|     |      |    |            |            |     |    |        |      |       |       |         |     |     |         |         |        |      |
|-----|------|----|------------|------------|-----|----|--------|------|-------|-------|---------|-----|-----|---------|---------|--------|------|
| 105 | Case | CC | 2015-07-01 | 2015-07-01 | 1.7 | 62 | Male   | 2.82 | 4.54  | 19.74 | 32.53   | Yes | No  | Yes     | No      | 2909.7 | 7.7  |
| 106 | Case | CC | 2015-07-21 | 2015-07-21 | 1.8 | 54 | Female | 0.69 | 2.16  | 6.57  | 25.44   | No  | Yes | Yes     | No      | 765.5  | 3.7  |
| 107 | Case | CC | 2015-04-21 | 2015-04-21 | 1.6 | 77 | Male   | 3.49 | 2.48  | 0.00  | 29.96   | No  | No  | Missing | Missing | 2535.5 | 9.1  |
| 108 | Case | CC | 2014-07-01 | 2014-07-01 | 1.1 | 64 | Male   | 6.07 | 2.22  | 10.8  | 28.33   | Yes | Yes | Missing | Missing | 2627.1 | 12.1 |
| 109 | Case | CC | 2014-05-29 | 2014-05-29 | 5.4 | 59 | Female | 2.53 | 10.00 | 13.02 | 22.62   | No  | No  | Yes     | Yes     | 1233.5 | 5.3  |
| 110 | Case | CC | 2015-07-02 | 2015-07-02 | 1.3 | 74 | Male   | 2.17 | 5.18  | 14.48 | 24.75   | No  | No  | Yes     | No      | 1517.3 | 5.0  |
| 111 | Case | CC | 2015-03-25 | 2015-03-25 | 1.3 | 63 | Male   | 3.14 | 4.07  | 15.87 | 31.12   | No  | Yes | Yes     | No      | 704.8  | 6.2  |
| 112 | Case | CC | 2015-04-27 | 2015-04-27 | 2.0 | 64 | Male   | 2.38 | 3.59  | 5.75  | 23.95   | Yes | No  | Missing | Missing | 780.1  | 5.8  |
| 113 | Case | CC | 2015-10-08 | 2015-10-08 | 2.0 | 65 | Female | 0.77 | 2.24  | 3.69  | 23.46   | No  | No  | No      | No      | 2127.2 | 5.5  |
| 114 | Case | CC | 2015-06-13 | 2015-06-13 | 1.7 | 61 | Female | 1.35 | 5.50  | 28.27 | 24.77   | No  | No  | Yes     | No      | 1283.6 | 12.4 |
| 115 | Case | CC | 2014-12-27 | 2014-12-27 | 6.0 | 69 | Female | 2.44 | 10.30 | 27.04 | 22.64   | No  | Yes | Yes     | No      | 1222.7 | 2.5  |
| 116 | Case | CC | 2015-02-25 | 2015-02-25 | 1.1 | 71 | Female | 0.65 | 2.22  | 5.07  | 33.53   | No  | No  | Yes     | No      | 1958.3 | 6.6  |
| 117 | Case | CC | 2015-12-30 | 2015-12-30 | 2.2 | 71 | Male   | 1.60 | 3.09  | 4.89  | 23.18   | Yes | Yes | Yes     | No      | 1534.6 | 2.7  |
| 118 | Case | CC | 2013-11-30 | 2013-11-30 | 0.5 | 61 | Male   | 8.24 | 2.74  | 17.55 | 22.91   | No  | No  | Missing | Missing | 1165.1 | 4.9  |
| 119 | Case | CC | 2013-03-27 | 2013-03-27 | 4.2 | 61 | Male   | 3.35 | 4.50  | 16.98 | Missing | No  | No  | Yes     | No      | 236.6  | 11.5 |
| 120 | Case | CC | 2016-09-04 | 2016-09-04 | 2.6 | 70 | Female | 2.14 | 5.16  | 24.78 | 26.97   | No  | No  | Yes     | No      | 2811.2 | 7.1  |
| 121 | Case | CC | 2015-08-04 | 2015-08-04 | 6.8 | 74 | Male   | 1.09 | 2.22  | 7.23  | 24.99   | No  | No  | Yes     | No      | 1296.3 | 4.9  |
| 122 | Case | CC | 2011-05-07 | 2011-05-07 | 2.5 | 77 | Male   | 1.28 | 0.01  | 5.26  | 23.22   | Yes | Yes | Yes     | No      | 1557.0 | 10.5 |
| 123 | Case | CC | 2013-05-30 | 2013-05-30 | 4.4 | 72 | Male   | 2.28 | 0.22  | 21.66 | 24.54   | Yes | No  | Yes     | No      | 1721.7 | 15.1 |
| 124 | Case | CC | 2014-06-17 | 2014-06-17 | 0.3 | 68 | Male   | 1.40 | 2.24  | 0.00  | 19.72   | No  | No  | Yes     | Yes     | 1705.2 | 10.0 |
| 125 | Case | CC | 2015-10-17 | 2015-10-17 | 1.9 | 69 | Female | 1.05 | 2.35  | 2.32  | 20.70   | No  | No  | Yes     | Yes     | 1108.4 | 4.6  |
| 126 | Case | CC | 2013-08-12 | 2013-08-12 | 0.3 | 78 | Male   | 1.10 | 2.26  | 8.14  | Missing | No  | No  | Missing | Missing | 3571.2 | 12.3 |
| 127 | Case | CC | 2013-02-01 | 2013-02-01 | 4.3 | 73 | Male   | 5.43 | 12.30 | 15.83 | 29.32   | Yes | No  | Yes     | No      | 1367.1 | 5.7  |
| 128 | Case | CC | 2016-08-12 | 2016-08-12 | 7.8 | 60 | Female | 1.86 | 6.00  | 2.49  | 27.16   | No  | No  | Yes     | No      | 1506.0 | 16.7 |
| 129 | Case | CC | 2015-12-02 | 2015-12-02 | 2.1 | 63 | Male   | 1.57 | 3.02  | 6.49  | 29.40   | Yes | No  | Yes     | No      | 435.8  | 7.7  |
| 130 | Case | CC | 2014-03-18 | 2014-03-18 | 5.4 | 63 | Male   | 3.66 | 4.60  | 4.62  | 17.07   | Yes | No  | Yes     | No      | 1588.1 | 4.4  |
| 131 | Case | CC | 2015-04-20 | 2015-04-20 | 1.7 | 69 | Male   | 0.87 | 8.80  | 6.99  | 31.60   | Yes | Yes | Missing | Missing | 4679.7 | 7.6  |
| 132 | Case | CC | 2012-12-04 | 2012-12-04 | 4.0 | 73 | Male   | 3.41 | 14.60 | 18.46 | 26.56   | No  | No  | Yes     | No      | 1189.3 | 7.0  |

|     |      |    |            |            |     |    |        |      |       |       |         |     |     |         |         |        |      |
|-----|------|----|------------|------------|-----|----|--------|------|-------|-------|---------|-----|-----|---------|---------|--------|------|
| 133 | Case | CC | 2013-08-10 | 2013-08-10 | 4.7 | 73 | Female | 3.40 | 8.20  | 2.00  | 31.47   | No  | No  | Yes     | No      | 311.7  | 3.6  |
| 134 | Case | CC | 2016-05-19 | 2016-05-19 | 2.5 | 66 | Male   | 0.96 | 4.12  | 11.87 | 35.29   | Yes | Yes | Yes     | No      | 1415.1 | 11.1 |
| 135 | Case | CC | 2015-12-08 | 2015-12-08 | 2.1 | 68 | Female | 0.81 | 3.45  | 15.88 | 26.93   | Yes | No  | Missing | Missing | 1808.6 | 7.8  |
| 136 | Case | CC | 2010-04-08 | 2010-04-08 | 1.3 | 72 | Female | 2.78 | 0.25  | 5.24  | 19.63   | No  | No  | Yes     | No      | 1105.8 | 6.0  |
| 137 | Case | CC | 2013-10-25 | 2013-10-25 | 0.4 | 77 | Female | 0.60 | 1.24  | 2.13  | 21.79   | No  | No  | Missing | Missing | 1610.2 | 3.5  |
| 138 | Case | CC | 2013-07-07 | 2013-07-07 | 4.8 | 70 | Male   | 1.80 | 1.06  | 14.19 | 27.73   | Yes | Yes | Yes     | No      | 211.6  | 4.9  |
| 139 | Case | CC | 2015-03-23 | 2015-03-23 | 1.5 | 60 | Female | 1.12 | 4.31  | 4.13  | 29.09   | No  | No  | Missing | Missing | 3861.1 | 14.5 |
| 140 | Case | CC | 2013-11-26 | 2013-11-26 | 4.8 | 66 | Female | 0.61 | 16.30 | 22.96 | 21.70   | No  | No  | No      | No      | 634.7  | 10.8 |
| 141 | Case | CC | 2013-07-11 | 2013-07-11 | 0.5 | 68 | Female | 2.40 | 3.69  | 21.39 | 23.08   | No  | No  | Yes     | No      | 1524.5 | 2.9  |
| 142 | Case | CC | 2009-08-13 | 2009-08-13 | 0.8 | 60 | Female | 0.49 | 1.43  | 8.58  | 26.23   | No  | No  | Yes     | No      | 3738.3 | 7.7  |
| 143 | Case | CC | 2015-08-23 | 2015-08-23 | 1.5 | 73 | Male   | 1.89 | 6.97  | 5.23  | 22.96   | Yes | No  | Yes     | No      | 1218.7 | 6.7  |
| 144 | Case | CC | 2013-07-31 | 2013-07-31 | 0.6 | 71 | Male   | 4.00 | 4.21  | 0.00  | 22.61   | Yes | No  | Yes     | No      | 683.0  | 9.9  |
| 145 | Case | CC | 2016-02-23 | 2016-02-23 | 2.2 | 78 | Female | 4.02 | 2.63  | 49.02 | 27.77   | No  | No  | Yes     | No      | 378.0  | 13.7 |
| 146 | Case | CC | 2015-08-16 | 2015-08-16 | 6.8 | 76 | Female | 1.69 | 0.46  | 17.35 | Missing | No  | No  | Yes     | No      | 1169.9 | 8.3  |
| 147 | Case | CC | 2013-09-16 | 2013-09-16 | 0.9 | 62 | Female | 0.68 | 2.22  | 2.23  | 25.42   | Yes | No  | Yes     | No      | 2629.0 | 4.0  |
| 148 | Case | CC | 2012-06-25 | 2012-06-25 | 3.7 | 68 | Male   | 0.71 | 2.05  | 5.37  | 24.30   | Yes | Yes | Yes     | No      | 1525.1 | 5.2  |
| 149 | Case | CC | 2009-12-18 | 2009-12-18 | 1.1 | 73 | Male   | 2.81 | 3.68  | 0.00  | 30.86   | No  | No  | Yes     | No      | 284.3  | 4.1  |
| 150 | Case | CC | 2011-08-01 | 2011-08-01 | 2.8 | 69 | Female | 1.44 | 4.54  | 0.00  | 23.61   | No  | No  | Yes     | No      | 1638.9 | 4.6  |
| 151 | Case | CC | 2015-03-16 | 2015-03-16 | 1.4 | 69 | Male   | 2.79 | 2.85  | 7.45  | 20.37   | Yes | Yes | Yes     | No      | 1177.1 | 0.8  |
| 152 | Case | CC | 2014-01-16 | 2014-01-16 | 0.6 | 71 | Male   | 3.60 | 3.11  | 4.92  | 23.63   | Yes | Yes | Missing | Missing | 1807.1 | 6.8  |
| 153 | Case | CC | 2016-03-24 | 2016-03-24 | 2.3 | 65 | Male   | 7.17 | 2.24  | 17.78 | 28.73   | Yes | Yes | Yes     | No      | 3166.9 | 16.5 |
| 154 | Case | CC | 2014-12-06 | 2014-12-06 | 6.1 | 68 | Female | 0.92 | 6.40  | 11.48 | 23.26   | No  | No  | Yes     | No      | 1105.9 | 12.3 |
| 155 | Case | CC | 2009-12-09 | 2009-12-09 | 1.1 | 67 | Male   | 0.70 | 2.64  | 2.18  | 25.46   | Yes | Yes | Yes     | No      | 3069.8 | 7.3  |
| 156 | Case | RC | 2013-11-10 | 2013-11-10 | 4.8 | 79 | Male   | 1.19 | 68.60 | 12.47 | 22.77   | Yes | Yes | Yes     | No      | 897.6  | 3.7  |
| 157 | Case | RC | 2013-11-10 | 2013-11-10 | 0.8 | 68 | Male   | 1.13 | 3.00  | 4.99  | 20.08   | No  | No  | Yes     | No      | 630.5  | 7.4  |
| 158 | Case | RC | 2010-01-09 | 2010-01-09 | 1.3 | 67 | Female | 0.07 | 0.01  | 1.54  | 23.06   | No  | No  | Yes     | No      | 1298.3 | 13.0 |
| 159 | Case | RC | 2016-10-08 | 2016-10-08 | 3.0 | 64 | Male   | 0.97 | 3.64  | 2.72  | 22.95   | No  | Yes | Yes     | No      | 2114.2 | 3.0  |
| 160 | Case | RC | 2014-07-02 | 2014-07-02 | 5.4 | 60 | Male   | 3.20 | 11.30 | 14.78 | 22.51   | Yes | Yes | Yes     | No      | 300.4  | 7.2  |

|     |      |    |            |            |     |    |        |      |       |       |       |     |     |         |         |        |      |
|-----|------|----|------------|------------|-----|----|--------|------|-------|-------|-------|-----|-----|---------|---------|--------|------|
| 161 | Case | RC | 2016-03-17 | 2016-03-17 | 2.1 | 67 | Male   | 1.02 | 5.01  | 5.66  | 26.08 | Yes | Yes | No      | No      | 2032.8 | 5.5  |
| 162 | Case | RC | 2013-05-13 | 2013-05-13 | 0.2 | 65 | Male   | 0.52 | 5.20  | 6.03  | 23.70 | No  | Yes | Yes     | No      | 1608.8 | 10.5 |
| 163 | Case | RC | 2015-01-12 | 2015-01-12 | 1.6 | 68 | Male   | 1.14 | 1.14  | 3.36  | 22.79 | Yes | Yes | Missing | Missing | 2139.8 | 6.2  |
| 164 | Case | RC | 2012-02-23 | 2012-02-23 | 3.1 | 65 | Male   | 2.74 | 14.10 | 34.68 | 23.59 | Yes | Yes | Yes     | No      | 1449.2 | 4.2  |
| 165 | Case | RC | 2013-11-10 | 2013-11-10 | 0.8 | 62 | Male   | 0.74 | 3.23  | 2.9   | 23.32 | Yes | Yes | Yes     | No      | 2086.9 | 6.5  |
| 166 | Case | RC | 2016-10-10 | 2016-10-10 | 7.8 | 69 | Male   | 3.44 | 8.00  | 86.03 | 25.50 | No  | No  | Yes     | No      | 498.0  | 8.0  |
| 167 | Case | RC | 2013-11-10 | 2013-11-10 | 0.1 | 62 | Male   | 1.38 | 2.06  | 5.11  | 25.83 | No  | No  | Yes     | No      | 1255.3 | 5.4  |
| 168 | Case | RC | 2010-12-18 | 2010-12-18 | 2.2 | 62 | Male   | 5.72 | 9.70  | 8.86  | 19.38 | Yes | No  | Yes     | No      | 1545.0 | 3.4  |
| 169 | Case | RC | 2012-09-24 | 2012-09-24 | 3.8 | 57 | Female | 3.10 | 12.90 | 26.51 | 20.36 | No  | No  | Yes     | No      | 1192.2 | 5.6  |
| 170 | Case | RC | 2009-06-15 | 2009-06-15 | 0.5 | 75 | Male   | 2.77 | 4.80  | 16.56 | 21.28 | Yes | No  | Yes     | No      | 6230.1 | 11.1 |
| 171 | Case | RC | 2010-05-26 | 2010-05-26 | 1.4 | 75 | Male   | 3.35 | 4.20  | 7.09  | 24.54 | No  | No  | Yes     | No      | 314.7  | 5.2  |
| 172 | Case | RC | 2016-10-24 | 2016-10-24 | 2.9 | 72 | Male   | 0.77 | 2.08  | 3.28  | 30.44 | No  | No  | Yes     | No      | 592.4  | 5.4  |
| 173 | Case | RC | 2013-11-10 | 2013-11-10 | 4.9 | 65 | Male   | 6.13 | 6.20  | 55.94 | 20.92 | No  | No  | Yes     | No      | 377.1  | 6.7  |
| 174 | Case | RC | 2013-11-10 | 2013-11-10 | 5.0 | 85 | Male   | 6.49 | 9.00  | 12.46 | 21.23 | Yes | Yes | Yes     | No      | 1798.7 | 5.8  |
| 175 | Case | RC | 2014-12-11 | 2014-12-11 | 6.0 | 59 | Male   | 1.72 | 1.14  | 4.64  | 29.05 | Yes | Yes | Yes     | No      | 1195.9 | 7.7  |
| 176 | Case | RC | 2013-11-10 | 2013-11-10 | 4.9 | 70 | Female | 2.07 | 0.69  | 8.75  | 22.68 | No  | No  | Yes     | No      | 943.3  | 5.1  |
| 177 | Case | RC | 2013-11-10 | 2013-11-10 | 0.9 | 67 | Female | 1.62 | 5.62  | 0.00  | 22.48 | No  | No  | Yes     | No      | 1103.6 | 3.2  |
| 178 | Case | RC | 2014-01-20 | 2014-01-20 | 0.1 | 68 | Male   | 2.05 | 2.92  | 4.93  | 28.09 | Yes | No  | Yes     | No      | 2093.0 | 16.4 |
| 179 | Case | RC | 2014-08-24 | 2014-08-24 | 0.8 | 59 | Male   | 2.58 | 7.18  | 0.00  | 25.65 | Yes | Yes | Yes     | No      | 848.7  | 12.7 |
| 180 | Case | RC | 2014-01-27 | 2014-01-27 | 0.3 | 70 | Male   | 1.30 | 4.66  | 0.00  | 32.27 | No  | Yes | Yes     | No      | 1635.7 | 2.3  |
| 181 | Case | RC | 2013-11-30 | 2013-11-30 | 0.1 | 63 | Female | 0.95 | 2.66  | 4.67  | 23.59 | No  | No  | Missing | No      | 1160.3 | 15.8 |
| 182 | Case | RC | 2011-09-01 | 2011-09-01 | 2.8 | 60 | Female | 4.46 | 0.55  | 0.01  | 24.01 | No  | No  | Yes     | No      | 1757.8 | 3.9  |
| 183 | Case | RC | 2011-02-18 | 2011-02-18 | 2.3 | 64 | Male   | 5.29 | 2.64  | 15.34 | 20.20 | Yes | Yes | Yes     | No      | 619.8  | 9.5  |
| 184 | Case | RC | 2013-10-16 | 2013-10-16 | 0.1 | 66 | Male   | 5.23 | 5.51  | 17.99 | 23.14 | Yes | Yes | Missing | Missing | 4077.4 | 10.7 |
| 185 | Case | RC | 2016-08-22 | 2016-08-22 | 2.7 | 61 | Female | 1.38 | 2.52  | 5.29  | 29.05 | No  | No  | Yes     | No      | 1479.3 | 5.7  |
| 186 | Case | RC | 2013-11-10 | 2013-11-10 | 1.0 | 58 | Female | 1.55 | 2.89  | 0.00  | 21.76 | No  | No  | Yes     | No      | 1529.7 | 18.1 |
| 187 | Case | RC | 2010-09-30 | 2010-09-30 | 1.8 | 60 | Female | 2.47 | 7.10  | 4.75  | 25.39 | No  | No  | Yes     | No      | 1175.7 | 4.2  |
| 188 | Case | RC | 2010-11-24 | 2010-11-24 | 1.7 | 67 | Male   | 2.35 | 12.40 | 13.60 | 24.57 | No  | No  | Yes     | No      | 1255.7 | 12.1 |

|     |      |    |            |            |     |    |        |        |       |        |       |     |     |         |         |        |      |
|-----|------|----|------------|------------|-----|----|--------|--------|-------|--------|-------|-----|-----|---------|---------|--------|------|
| 189 | Case | RC | 2014-01-03 | 2014-01-03 | 0.5 | 62 | Male   | 8.39   | 1.54  | 7.05   | 27.40 | Yes | No  | Missing | Missing | 4125.7 | 6.8  |
| 190 | Case | RC | 2016-08-15 | 2016-08-15 | 2.7 | 72 | Male   | 1.30   | 3.70  | 6.63   | 26.67 | No  | No  | Yes     | No      | 1297.7 | 18.1 |
| 191 | Case | RC | 2013-11-10 | 2013-11-10 | 4.9 | 68 | Male   | 3.75   | 8.00  | 12.90  | 17.51 | Yes | Yes | No      | No      | 390.3  | 5.7  |
| 192 | Case | RC | 2012-06-15 | 2012-06-15 | 3.4 | 57 | Female | 1.72   | 7.60  | 2.00   | 21.25 | No  | No  | Yes     | No      | 2216.9 | 6.8  |
| 193 | Case | RC | 2013-03-29 | 2013-03-29 | 4.4 | 65 | Male   | 2.16   | 6.20  | 4.94   | 24.91 | Yes | No  | Yes     | No      | 2017.2 | 6.4  |
| 194 | Case | RC | 2016-03-14 | 2016-03-14 | 2.8 | 62 | Male   | 1.65   | 1.86  | 0.00   | 27.83 | Yes | Yes | Missing | Missing | 3897.7 | 9.0  |
| 195 | Case | RC | 2011-09-19 | 2011-09-19 | 2.9 | 75 | Female | 4.10   | 6.50  | 4.98   | 20.59 | No  | No  | No      | No      | 1515.4 | 2.0  |
| 196 | Case | RC | 2015-12-09 | 2015-12-09 | 2.4 | 53 | Female | 1.21   | 5.73  | 11.09  | 24.88 | No  | No  | Missing | Missing | 1566.1 | 2.6  |
| 197 | Case | RC | 2016-12-23 | 2016-12-23 | 3.2 | 62 | Female | 0.86   | 4.78  | 2.58   | 24.26 | No  | No  | No      | No      | 2095.6 | 7.3  |
| 198 | Case | RC | 2012-09-15 | 2012-09-15 | 3.9 | 70 | Female | 2.34   | 13.90 | 6.19   | 32.20 | No  | Yes | Yes     | No      | 1513.5 | 5.1  |
| 199 | Case | RC | 2016-02-26 | 2016-02-26 | 2.4 | 68 | Female | 1.47   | 2.91  | 4.45   | 27.66 | Yes | No  | Yes     | No      | 459.8  | 8.9  |
| 200 | Case | RC | 2013-11-10 | 2013-11-10 | 0.8 | 69 | Female | 0.96   | 3.64  | 4.9    | 24.78 | No  | No  | Yes     | No      | 1123.6 | 15.0 |
| 201 | Case | RC | 2013-11-10 | 2013-11-10 | 0.2 | 72 | Female | 1.83   | 8.21  | 4.52   | 24.35 | No  | No  | Yes     | No      | 2371.3 | 5.5  |
| 202 | Case | RC | 2013-11-10 | 2013-11-10 | 4.7 | 82 | Female | 695.70 | 12.60 | 310.65 | 23.14 | No  | No  | No      | No      | 480.5  | 12.6 |
| 203 | Case | RC | 2012-06-20 | 2012-06-20 | 3.4 | 68 | Female | 1.76   | 11.70 | 18.82  | 25.27 | No  | No  | Yes     | No      | 817.1  | 4.4  |
| 204 | Case | RC | 2012-04-23 | 2012-04-23 | 3.2 | 63 | Female | 2.09   | 11.30 | 3.88   | 26.39 | No  | No  | Yes     | No      | 264.6  | 4.7  |
| 205 | Case | RC | 2014-12-18 | 2014-12-18 | 1.1 | 75 | Male   | 0.85   | 6.51  | 6.53   | 31.81 | Yes | No  | Yes     | No      | 1610.2 | 13.8 |
| 206 | Case | RC | 2009-03-14 | 2009-03-14 | 0.4 | 74 | Female | 4.99   | 16.40 | 29.10  | 20.95 | No  | No  | Yes     | No      | 2686.0 | 5.3  |
| 207 | Case | RC | 2013-11-10 | 2013-11-10 | 0.9 | 64 | Female | 0.85   | 4.13  | 3.22   | 25.10 | No  | Yes | Yes     | Yes     | 943.9  | 7.3  |
| 208 | Case | RC | 2013-11-10 | 2013-11-10 | 0.2 | 64 | Female | 2.86   | 4.74  | 0.00   | 21.86 | No  | No  | Yes     | No      | 1279.4 | 6.6  |
| 209 | Case | RC | 2016-10-12 | 2016-10-12 | 8.1 | 81 | Female | 1.57   | 3.89  | 28.63  | 21.52 | No  | No  | No      | No      | 187.2  | 13.1 |
| 210 | Case | RC | 2013-05-19 | 2013-05-19 | 4.4 | 75 | Female | 1.30   | 0.51  | 5.25   | 27.32 | No  | No  | Yes     | No      | 653.3  | 4.6  |
| 211 | Case | RC | 2012-04-06 | 2012-04-06 | 3.2 | 70 | Female | 2.11   | 0.01  | 22.82  | 20.11 | No  | No  | Yes     | No      | 2079.5 | 7.3  |
| 212 | Case | RC | 2016-02-23 | 2016-02-23 | 2.5 | 72 | Female | 1.09   | 2.27  | 0.00   | 22.27 | No  | No  | Missing | Missing | 2810.9 | 3.1  |
| 213 | Case | RC | 2016-08-10 | 2016-08-10 | 7.6 | 73 | Female | 2.12   | 10.10 | 13.56  | 21.34 | No  | No  | Yes     | No      | 312.7  | 8.9  |
| 214 | Case | RC | 2013-11-10 | 2013-11-10 | 4.8 | 77 | Female | 2.30   | 4.60  | 17.87  | 22.52 | No  | No  | Yes     | No      | 420.3  | 9.4  |
| 215 | Case | RC | 2010-11-22 | 2010-11-22 | 1.9 | 77 | Female | 4.03   | 4.80  | 10.87  | 26.02 | No  | No  | Yes     | No      | 117.9  | 7.5  |
| 216 | Case | RC | 2012-10-19 | 2012-10-19 | 4.0 | 67 | Male   | 3.74   | 4.10  | 16.48  | 17.37 | Yes | No  | Yes     | No      | 2164.6 | 5.5  |

|     |      |    |            |            |     |    |        |      |       |       |         |     |     |         |         |        |      |
|-----|------|----|------------|------------|-----|----|--------|------|-------|-------|---------|-----|-----|---------|---------|--------|------|
| 217 | Case | RC | 2011-11-14 | 2011-11-14 | 2.9 | 60 | Female | 4.31 | 0.97  | 24.74 | 21.99   | No  | No  | Yes     | No      | 1223.2 | 5.8  |
| 218 | Case | RC | 2016-09-15 | 2016-09-15 | 2.8 | 62 | Female | 0.47 | 6.12  | 2.49  | Missing | No  | No  | Yes     | No      | 1208.0 | 7.2  |
| 219 | Case | RC | 2012-11-05 | 2012-11-05 | 4.0 | 56 | Female | 1.08 | 7.90  | 2.89  | 24.84   | No  | No  | Yes     | No      | 1760.6 | 10.0 |
| 220 | Case | RC | 2009-11-18 | 2009-11-18 | 0.8 | 81 | Male   | 4.74 | 10.90 | 8.99  | 22.69   | Yes | Yes | Yes     | No      | 5151.0 | 5.2  |
| 221 | Case | RC | 2016-10-11 | 2016-10-11 | 2.7 | 67 | Male   | 0.97 | 3.26  | 10.73 | 24.22   | Yes | No  | No      | No      | 1840.3 | 10.9 |
| 222 | Case | RC | 2011-08-27 | 2011-08-27 | 2.8 | 64 | Male   | 1.16 | 0.63  | 5.60  | 19.36   | Yes | Yes | Yes     | No      | 216.1  | 6.6  |
| 223 | Case | RC | 2012-12-17 | 2012-12-17 | 4.2 | 71 | Male   | 1.12 | 2.90  | 0.00  | 19.15   | Yes | No  | Yes     | No      | 1649.5 | 5.2  |
| 224 | Case | RC | 2013-07-12 | 2013-07-12 | 4.8 | 51 | Male   | 1.50 | 8.46  | 10.41 | 18.25   | Yes | Yes | No      | No      | 679.4  | 5.2  |
| 225 | Case | RC | 2012-04-13 | 2012-04-13 | 3.5 | 57 | Female | 1.60 | 4.68  | 8.04  | 26.56   | No  | No  | Yes     | No      | 1123.8 | 7.2  |
| 226 | Case | RC | 2009-03-07 | 2009-03-07 | 0.3 | 77 | Male   | 3.45 | 8.70  | 22.65 | 25.99   | Yes | No  | Yes     | No      | 1426.1 | 9.8  |
| 227 | Case | RC | 2016-03-23 | 2016-03-23 | 7.4 | 71 | Male   | 2.74 | 14.30 | 2.98  | 23.51   | Yes | Yes | Yes     | No      | 1892.4 | 3.0  |
| 228 | Case | RC | 2016-11-10 | 2016-11-10 | 7.6 | 76 | Male   | 0.51 | 3.40  | 31.64 | 24.80   | No  | Yes | Yes     | No      | 1309.5 | 8.4  |
| 229 | Case | RC | 2016-10-13 | 2016-10-13 | 2.6 | 78 | Male   | 2.92 | 5.13  | 5.82  | 24.86   | No  | No  | Yes     | No      | 862.1  | 8.7  |
| 230 | Case | RC | 2013-11-26 | 2013-11-26 | 1.0 | 65 | Male   | 1.66 | 8.23  | 14.07 | 19.49   | No  | No  | Yes     | No      | 1899.5 | 10.6 |
| 231 | Case | RC | 2016-08-29 | 2016-08-29 | 7.7 | 63 | Male   | 2.73 | 13.90 | 5.00  | 25.95   | Yes | No  | Yes     | No      | 339.0  | 4.0  |
| 232 | Case | RC | 2013-12-01 | 2013-12-01 | 0.1 | 65 | Male   | 0.69 | 3.12  | 3.01  | 24.24   | Yes | No  | Missing | Missing | 1140.6 | 3.4  |
| 233 | Case | RC | 2015-11-13 | 2015-11-13 | 2.2 | 90 | Male   | 1.14 | 3.84  | 3.62  | 22.55   | No  | No  | Missing | Missing | 2050.0 | 6.9  |
| 234 | Case | RC | 2015-06-09 | 2015-06-09 | 1.8 | 76 | Female | 0.52 | 3.09  | 0.00  | 25.12   | No  | Yes | Missing | Missing | 5277.2 | 11.7 |
| 235 | Case | RC | 2016-09-20 | 2016-09-20 | 3.0 | 62 | Female | 2.20 | 2.65  | 0.00  | 26.06   | No  | No  | Missing | Missing | 3857.3 | 15.2 |
| 236 | Case | RC | 2016-03-05 | 2016-03-05 | 2.5 | 61 | Female | 0.60 | 2.28  | 0.00  | 24.68   | No  | No  | Missing | Missing | 1689.0 | 11.4 |
| 237 | Case | RC | 2014-03-04 | 2014-03-04 | 5.0 | 58 | Female | 2.21 | 8.00  | 12.69 | 25.67   | No  | No  | Yes     | No      | 1148.6 | 4.1  |
| 238 | Case | RC | 2012-11-28 | 2012-11-28 | 3.9 | 78 | Male   | 2.03 | 6.70  | 4.61  | 25.97   | No  | No  | Yes     | No      | 415.6  | 9.4  |
| 239 | Case | RC | 2016-04-13 | 2016-04-13 | 2.3 | 69 | Male   | 1.20 | 3.22  | 5.96  | 27.43   | Yes | No  | Yes     | No      | 3232.8 | 5.0  |
| 240 | Case | RC | 2012-08-14 | 2012-08-14 | 3.7 | 75 | Female | 1.92 | 0.38  | 17.01 | 27.41   | No  | No  | Yes     | No      | 2294.0 | 5.4  |
| 241 | Case | RC | 2013-04-13 | 2013-04-13 | 4.3 | 76 | Female | 1.61 | 7.20  | 7.05  | 21.27   | No  | No  | Yes     | No      | 2591.2 | 8.3  |
| 242 | Case | RC | 2011-10-06 | 2011-10-06 | 2.8 | 66 | Female | 1.81 | 11.70 | 2.00  | 27.16   | No  | No  | Yes     | No      | 1379.1 | 10.3 |
| 243 | Case | RC | 2012-07-07 | 2012-07-07 | 3.5 | 69 | Female | 2.74 | 7.10  | 6.85  | 26.30   | No  | No  | Yes     | No      | 1268.3 | 8.1  |
| 244 | Case | RC | 2011-09-27 | 2011-09-27 | 2.8 | 65 | Male   | 1.23 | 14.20 | 12.95 | 24.75   | No  | No  | No      | No      | 322.0  | 4.5  |

|     |      |    |            |            |     |    |        |      |        |       |         |     |     |         |         |        |      |
|-----|------|----|------------|------------|-----|----|--------|------|--------|-------|---------|-----|-----|---------|---------|--------|------|
| 245 | Case | RC | 2016-08-04 | 2016-08-04 | 2.4 | 73 | Male   | 1.59 | 5.63   | 5.57  | 31.73   | Yes | Yes | Yes     | No      | 1141.8 | 10.2 |
| 246 | Case | RC | 2009-03-13 | 2009-03-13 | 0.0 | 63 | Female | 1.23 | 13.30  | 29.73 | 26.87   | No  | No  | Yes     | No      | 1402.3 | 9.7  |
| 247 | Case | RC | 2012-05-20 | 2012-05-20 | 3.5 | 59 | Male   | 1.77 | 0.21   | 9.95  | Missing | Yes | Yes | Yes     | No      | 1718.9 | 5.6  |
| 248 | Case | RC | 2013-11-10 | 2013-11-10 | 0.9 | 58 | Male   | 0.70 | 3.11   | 5.42  | 22.69   | No  | No  | Yes     | Missing | 1471.2 | 8.9  |
| 249 | Case | RC | 2012-05-10 | 2012-05-10 | 3.5 | 61 | Male   | 0.46 | 6.81   | 5.99  | 24.15   | No  | No  | Yes     | No      | 412.4  | 7.0  |
| 250 | Case | RC | 2013-11-10 | 2013-11-10 | 4.7 | 57 | Female | 1.50 | 731.50 | 11.42 | 19.31   | No  | No  | Yes     | No      | 1254.6 | 6.6  |
| 251 | Case | RC | 2013-12-02 | 2013-12-02 | 4.9 | 62 | Male   | 2.31 | 11.80  | 9.64  | 28.40   | Yes | Yes | Yes     | No      | 1018.4 | 10.3 |
| 252 | Case | RC | 2012-05-22 | 2012-05-22 | 3.5 | 55 | Female | 0.41 | 7.13   | 17.25 | 23.31   | No  | No  | Yes     | No      | 1712.4 | 11.2 |
| 253 | Case | RC | 2013-07-04 | 2013-07-04 | 0.1 | 53 | Female | 0.69 | 2.61   | 0.00  | 24.84   | No  | No  | Missing | Missing | 2661.2 | 8.0  |
| 254 | Case | RC | 2013-07-29 | 2013-07-29 | 0.1 | 62 | Male   | 1.24 | 2.12   | 8.88  | 20.03   | Yes | Yes | Missing | Missing | 3939.6 | 11.7 |
| 255 | Case | RC | 2013-05-29 | 2013-05-29 | 0.5 | 64 | Male   | 4.06 | 2.13   | 35.86 | 28.97   | Yes | Yes | Yes     | No      | 2205.3 | 9.6  |
| 256 | Case | RC | 2013-11-10 | 2013-11-10 | 0.2 | 70 | Male   | 0.67 | 2.56   | 2     | 29.76   | No  | Yes | Yes     | No      | 3108.2 | 2.7  |
| 257 | Case | RC | 2013-08-05 | 2013-08-05 | 0.9 | 66 | Male   | 2.14 | 4.55   | 18.17 | 23.14   | No  | No  | Yes     | No      | 1274.9 | 12.1 |
| 258 | Case | RC | 2013-11-10 | 2013-11-10 | 5.0 | 72 | Female | 3.10 | 4.70   | 9.10  | 20.55   | No  | No  | Yes     | No      | 430.1  | 1.5  |
| 259 | Case | RC | 2013-11-10 | 2013-11-10 | 5.1 | 62 | Female | 1.87 | 1.35   | 0.00  | 27.06   | No  | No  | Yes     | No      | 4265.6 | 4.5  |
| 260 | Case | RC | 2014-01-10 | 2014-01-10 | 0.2 | 56 | Female | 2.71 | 6.65   | 0.00  | 26.03   | No  | No  | Yes     | No      | 644.6  | 13.2 |
| 261 | Case | RC | 2013-11-18 | 2013-11-18 | 5.1 | 66 | Male   | 0.31 | 2.09   | 8.68  | 23.24   | No  | No  | Yes     | No      | 2245.7 | 7.0  |
| 262 | Case | RC | 2015-05-04 | 2015-05-04 | 1.4 | 57 | Male   | 2.32 | 4.17   | 32.04 | 30.76   | Yes | No  | Yes     | No      | 565.7  | 7.6  |
| 263 | Case | RC | 2011-01-10 | 2011-01-10 | 2.3 | 63 | Female | 2.41 | 13.15  | 0.01  | 31.39   | No  | No  | Yes     | No      | 613.2  | 10.0 |
| 264 | Case | RC | 2016-03-21 | 2016-03-21 | 2.5 | 61 | Male   | 1.17 | 2.76   | 7.29  | 25.92   | No  | No  | Yes     | No      | 2106.2 | 6.1  |
| 265 | Case | RC | 2014-02-02 | 2014-02-02 | 0.3 | 76 | Male   | 9.55 | 11.21  | 4.3   | 22.95   | Yes | No  | No      | No      | 1219.9 | 8.4  |
| 266 | Case | RC | 2013-06-16 | 2013-06-16 | 0.6 | 61 | Male   | 0.54 | 3.18   | 10.98 | 28.80   | Yes | Yes | Yes     | No      | 3102.4 | 2.3  |
| 267 | Case | RC | 2012-08-10 | 2012-08-10 | 3.8 | 61 | Male   | 0.37 | 2.44   | 10.65 | 22.58   | Yes | No  | Yes     | No      | 2094.4 | 7.6  |
| 268 | Case | RC | 2010-03-10 | 2010-03-10 | 1.0 | 59 | Male   | 1.43 | 12.20  | 6.56  | 21.37   | Yes | No  | Yes     | No      | 1088.7 | 7.1  |
| 269 | Case | RC | 2012-04-16 | 2012-04-16 | 3.3 | 61 | Male   | 2.47 | 10.20  | 5.41  | 22.56   | No  | No  | Yes     | No      | 2295.2 | 9.5  |
| 270 | Case | RC | 2016-03-30 | 2016-03-30 | 2.5 | 72 | Male   | 1.73 | 5.73   | 11.94 | 22.99   | Yes | No  | Yes     | No      | 1187.5 | 1.3  |
| 271 | Case | CC | 2016-02-09 | 2016-02-09 | 2.2 | 49 | Male   | 2.35 | 3.45   | 0.00  | 23.39   | Yes | No  | Yes     | No      | 2018.5 | 12.0 |
| 272 | Case | RC | 2015-01-06 | 2015-01-06 | 6.1 | 54 | Female | 0.16 | 0.18   | 11.58 | 25.15   | No  | No  | Yes     | No      | 1181.2 | 7.0  |

|     |      |    |            |            |     |    |        |       |       |        |         |         |         |         |         |        |      |
|-----|------|----|------------|------------|-----|----|--------|-------|-------|--------|---------|---------|---------|---------|---------|--------|------|
| 273 | Case | RC | 2014-06-16 | 2014-06-16 | 0.7 | 62 | Male   | 2.79  | 2.06  | 0.00   | 23.34   | No      | Yes     | Yes     | No      | 1689.7 | 5.8  |
| 274 | Case | RC | 2014-11-03 | 2014-11-03 | 0.7 | 66 | Female | 0.65  | 2.63  | 3.85   | 31.11   | No      | Yes     | Yes     | No      | 673.4  | 4.8  |
| 275 | Case | RC | 2014-10-24 | 2014-10-24 | 1.0 | 60 | Male   | 0.50  | 1.41  | 0.00   | 25.92   | No      | No      | No      | No      | 1316.8 | 8.4  |
| 276 | Case | RC | 2014-12-10 | 2014-12-10 | 1.0 | 61 | Male   | 2.76  | 2.88  | 2.17   | 25.82   | Yes     | No      | Yes     | No      | 1766.2 | 10.0 |
| 277 | Case | RC | 2014-04-21 | 2014-04-21 | 0.9 | 67 | Male   | 10.94 | 1.98  | 3.96   | 25.82   | Yes     | Yes     | Missing | Missing | 4261.1 | 2.1  |
| 278 | Case | RC | 2013-11-30 | 2013-11-30 | 0.4 | 57 | Female | 0.74  | 2.24  | 3.09   | Missing | Missing | Missing | Missing | Missing | 2477.3 | 8.0  |
| 279 | Case | RC | 2013-11-30 | 2013-11-30 | 0.5 | 56 | Female | 1.22  | 5.22  | 2.85   | 20.83   | No      | No      | Missing | Missing | 3908.7 | 3.4  |
| 280 | Case | RC | 2013-11-30 | 2013-11-30 | 0.5 | 81 | Male   | 3.09  | 1.20  | 798.73 | 17.90   | No      | No      | Missing | Missing | 2929.7 | 3.3  |
| 281 | Case | RC | 2013-12-17 | 2013-12-17 | 0.1 | 73 | Male   | 1.41  | 4.72  | 4.96   | 25.86   | Yes     | Yes     | Yes     | No      | 2229.4 | 11.6 |
| 282 | Case | RC | 2014-07-07 | 2014-07-07 | 0.8 | 62 | Male   | 15.88 | 2.91  | 4.16   | 23.22   | Yes     | Yes     | Yes     | No      | 2014.0 | 9.1  |
| 283 | Case | RC | 2014-10-08 | 2014-10-08 | 1.1 | 79 | Female | 1.16  | 4.15  | 11.01  | 26.53   | No      | No      | No      | No      | 2366.6 | 10.5 |
| 284 | Case | RC | 2014-07-21 | 2014-07-21 | 5.8 | 71 | Female | 1.69  | 1.36  | 17.38  | 20.82   | No      | No      | Yes     | No      | 954.2  | 11.7 |
| 285 | Case | RC | 2015-03-23 | 2015-03-23 | 1.2 | 59 | Male   | 0.81  | 1.91  | 2.46   | Missing | Yes     | Yes     | No      | No      | 2189.1 | 10.8 |
| 286 | Case | RC | 2014-03-03 | 2014-03-03 | 0.6 | 61 | Female | 1.78  | 4.15  | 0.00   | 26.49   | No      | No      | Missing | Missing | 1557.8 | 2.8  |
| 287 | Case | RC | 2014-12-04 | 2014-12-04 | 6.1 | 58 | Female | 1.51  | 3.91  | 24.00  | 30.15   | No      | No      | Yes     | No      | 486.1  | 10.7 |
| 288 | Case | RC | 2014-11-17 | 2014-11-17 | 1.2 | 62 | Female | 3.17  | 1.89  | 31.33  | 22.64   | Yes     | No      | Yes     | No      | 1164.7 | 7.3  |
| 289 | Case | RC | 2014-07-03 | 2014-07-03 | 0.7 | 71 | Female | 0.90  | 2.16  | 2.3    | 29.48   | No      | No      | Yes     | No      | 2296.8 | 10.0 |
| 290 | Case | RC | 2014-08-19 | 2014-08-19 | 0.8 | 63 | Female | 1.53  | 4.18  | 5.46   | 26.84   | No      | No      | No      | No      | 1225.5 | 9.5  |
| 291 | Case | RC | 2015-04-27 | 2015-04-27 | 1.8 | 64 | Female | 1.46  | 3.90  | 29.64  | 21.50   | No      | No      | Missing | Missing | 3606.7 | 11.7 |
| 292 | Case | RC | 2014-07-01 | 2014-07-01 | 5.3 | 62 | Male   | 3.58  | 11.30 | 19.09  | 20.20   | Yes     | Yes     | Yes     | No      | 1421.4 | 7.9  |
| 293 | Case | RC | 2015-03-25 | 2015-03-25 | 1.7 | 64 | Male   | 8.32  | 1.77  | 0.00   | 27.87   | Yes     | Yes     | Missing | Missing | 3796.2 | 12.0 |
| 294 | Case | RC | 2014-07-07 | 2014-07-07 | 0.9 | 60 | Male   | 10.55 | 2.01  | 0.00   | 23.76   | No      | No      | Missing | Missing | 2819.8 | 5.3  |
| 295 | Case | RC | 2014-09-15 | 2014-09-15 | 0.8 | 68 | Female | 2.21  | 3.34  | 13.43  | Missing | No      | No      | Yes     | No      | 2731.2 | 10.5 |
| 296 | Case | RC | 2015-01-22 | 2015-01-22 | 1.2 | 59 | Male   | 2.24  | 2.80  | 0.00   | 22.86   | Yes     | Yes     | No      | No      | 1432.1 | 9.4  |
| 297 | Case | RC | 2014-02-24 | 2014-02-24 | 0.4 | 66 | Female | 1.64  | 4.53  | 11.4   | 20.01   | No      | No      | Yes     | No      | 1780.2 | 6.2  |
| 298 | Case | RC | 2014-03-24 | 2014-03-24 | 0.4 | 63 | Female | 19.88 | 2.24  | 5.14   | 28.06   | Yes     | Yes     | No      | No      | 1545.0 | 5.0  |
| 299 | Case | RC | 2015-02-26 | 2015-02-26 | 1.4 | 69 | Male   | 1.50  | 3.71  | 0.00   | 24.96   | Yes     | Yes     | Yes     | No      | 1261.3 | 9.5  |
| 300 | Case | CC | 2015-04-06 | 2015-04-06 | 6.5 | 73 | Female | 1.94  | 0.74  | 57.68  | 23.48   | No      | No      | Yes     | No      | 171.3  | 11.8 |



|     |         |    |            |            |      |    |        |      |       |       |         |     |     |         |     |        |      |
|-----|---------|----|------------|------------|------|----|--------|------|-------|-------|---------|-----|-----|---------|-----|--------|------|
| 301 | Case    | RC | 2014-03-27 | 2014-03-27 | 5.4  | 69 | Male   | 1.63 | 0.49  | 12.03 | 22.77   | No  | Yes | Yes     | No  | 1430.9 | 11.2 |
| 302 | Case    | RC | 2015-08-19 | 2015-08-19 | 1.7  | 77 | Male   | 0.77 | 4.10  | 75.35 | 31.60   | No  | No  | No      | No  | 1509.7 | 10.4 |
| 303 | Case    | RC | 2015-08-04 | 2015-08-04 | 2.5  | 67 | Male   | 1.22 | 6.59  | 4.42  | 29.21   | No  | No  | Yes     | No  | 1275.5 | 3.7  |
| 304 | Case    | CC | 2014-09-18 | 2014-09-18 | 1.2  | 73 | Male   | 1.21 | 5.30  | 4.05  | 21.01   | Yes | Yes | Missing | No  | 2513.2 | 6.7  |
| 305 | Case    | CC | 2018-11-17 | 2018-12-31 | 10.0 | 62 | Female | 3.99 | 0.54  | 29.87 | Missing | No  | No  | Yes     | No  | 2712.2 | 6.0  |
| 306 | Case    | CC | 2018-10-31 | 2018-12-31 | 10.0 | 72 | Female | 2.82 | 0.33  | 15.13 | 29.00   | No  | Yes | Yes     | No  | 1057.7 | 9.2  |
| 307 | Case    | CC | 2017-03-07 | 2018-12-31 | 8.0  | 66 | Male   | 2.73 | 12.40 | 11.16 | 22.15   | Yes | No  | Yes     | No  | 1731.9 | 7.4  |
| 308 | Control |    |            | 2018-12-31 |      | 67 | Male   | 3.35 | 8.10  | 14.16 | 21.40   | Yes | Yes | Yes     | No  | 427.9  | 5.9  |
| 309 | Control |    |            | 2018-12-31 |      | 72 | Male   | 2.50 | 21.70 | 11.83 | 30.04   | Yes | Yes | Yes     | No  | 280.3  | 7.1  |
| 310 | Control |    |            | 2018-12-31 |      | 64 | Female | 2.60 | 8.70  | 26.44 | 22.21   | No  | No  | Yes     | No  | 445.9  | 4.6  |
| 311 | Control |    |            | 2018-12-31 |      | 68 | Male   | 4.08 | 16.80 | 14.74 | 19.95   | Yes | Yes | Yes     | No  | 445.6  | 8.5  |
| 312 | Control |    |            | 2018-12-31 |      | 64 | Male   | 3.69 | 9.80  | 2.00  | 19.24   | Yes | No  | Yes     | No  | 357.9  | 8.1  |
| 313 | Control |    |            | 2018-12-31 |      | 75 | Male   | 2.80 | 10.30 | 2.00  | 27.54   | Yes | No  | Yes     | No  | 241.9  | 9.5  |
| 314 | Control |    |            | 2018-12-31 |      | 70 | Male   | 2.28 | 17.40 | 2.70  | 25.41   | Yes | Yes | No      | No  | 335.6  | 12.6 |
| 315 | Control |    |            | 2018-12-31 |      | 58 | Female | 0.50 | 9.10  | 2.00  | 28.20   | No  | No  | Yes     | Yes | 293.6  | 10.2 |
| 316 | Control |    |            | 2018-12-31 |      | 71 | Male   | 2.90 | 1.39  | 9.64  | 25.76   | Yes | No  | Yes     | No  | 1215.9 | 6.6  |
| 317 | Control |    |            | 2018-12-31 |      | 74 | Male   | 2.13 | 2.56  | 0.74  | 26.38   | No  | No  | Yes     | No  | 1359.2 | 13.8 |
| 318 | Control |    |            | 2018-12-31 |      | 63 | Female | 0.63 | 2.34  | 21.98 | 21.37   | No  | No  | Yes     | No  | 2058.3 | 3.0  |
| 319 | Control |    |            | 2018-12-31 |      | 50 | Female | 0.29 | 0.01  | 5.08  | 21.23   | No  | No  | No      | No  | 1984.8 | 8.9  |
| 320 | Control |    |            | 2018-12-31 |      | 61 | Male   | 0.59 | 0.02  | 2.65  | 26.07   | Yes | Yes | Yes     | No  | 1580.7 | 6.2  |
| 321 | Control |    |            | 2018-12-31 |      | 63 | Male   | 0.20 | 0.01  | 6.68  | 22.72   | Yes | Yes | Yes     | No  | 1187.5 | 3.5  |
| 322 | Control |    |            | 2018-12-31 |      | 61 | Male   | 0.58 | 1.31  | 13.55 | 21.41   | Yes | Yes | Yes     | No  | 1055.3 | 15.4 |
| 323 | Control |    |            | 2018-12-31 |      | 51 | Female | 0.87 | 1.49  | 13.46 | 23.84   | No  | No  | Yes     | No  | 1013.5 | 5.4  |
| 324 | Control |    |            | 2018-12-31 |      | 59 | Female | 0.17 | 0.01  | 7.53  | 26.10   | No  | No  | Yes     | No  | 1240.9 | 8.9  |
| 325 | Control |    |            | 2018-12-31 |      | 67 | Male   | 0.96 | 10.56 | 29.94 | 24.88   | No  | No  | No      | No  | 1410.9 | 7.0  |
| 326 | Control |    |            | 2018-12-31 |      | 73 | Male   | 0.44 | 0.01  | 1.52  | 25.84   | No  | No  | Yes     | Yes | 1298.0 | 8.3  |
| 327 | Control |    |            | 2018-12-31 |      | 60 | Male   | 1.21 | 1.16  | 12.09 | 25.30   | Yes | Yes | No      | No  | 316.5  | 14.0 |
| 328 | Control |    |            | 2018-12-31 |      | 68 | Male   | 0.17 | 0.96  | 3.55  | 24.17   | No  | No  | No      | No  | 1235.8 | 7.3  |

|     |         |            |    |        |      |       |       |       |     |     |     |    |        |      |
|-----|---------|------------|----|--------|------|-------|-------|-------|-----|-----|-----|----|--------|------|
| 329 | Control | 2018-12-31 | 77 | Male   | 0.85 | 4.33  | 5.84  | 28.86 | Yes | Yes | Yes | No | 1452.3 | 4.7  |
| 330 | Control | 2018-12-31 | 72 | Male   | 0.55 | 0.32  | 4.57  | 18.97 | Yes | Yes | No  | No | 1100.9 | 14.1 |
| 331 | Control | 2018-12-31 | 70 | Female | 0.71 | 4.90  | 3.31  | 20.08 | No  | Yes | Yes | No | 1857.2 | 7.3  |
| 332 | Control | 2018-12-31 | 74 | Male   | 4.05 | 5.10  | 9.68  | 25.87 | Yes | No  | Yes | No | 385.2  | 8.4  |
| 333 | Control | 2018-12-31 | 61 | Male   | 1.39 | 14.40 | 12.80 | 25.60 | Yes | No  | Yes | No | 909.2  | 6.4  |
| 334 | Control | 2018-12-31 | 68 | Female | 1.15 | 5.10  | 11.26 | 23.92 | No  | No  | Yes | No | 1573.2 | 11.3 |
| 335 | Control | 2018-12-31 | 67 | Male   | 1.84 | 13.00 | 10.70 | 27.34 | Yes | Yes | Yes | No | 219.4  | 8.9  |
| 336 | Control | 2018-12-31 | 61 | Male   | 2.05 | 8.70  | 12.82 | 27.25 | Yes | Yes | Yes | No | 680.1  | 1.5  |
| 337 | Control | 2018-12-31 | 78 | Male   | 1.93 | 11.00 | 4.90  | 21.12 | Yes | Yes | Yes | No | 273.3  | 8.6  |
| 338 | Control | 2018-12-31 | 70 | Male   | 3.23 | 18.40 | 5.00  | 27.45 | Yes | No  | Yes | No | 260.5  | 2.2  |
| 339 | Control | 2018-12-31 | 82 | Female | 1.14 | 9.10  | 2.00  | 19.47 | No  | No  | Yes | No | 247.2  | 11.4 |
| 340 | Control | 2018-12-31 | 73 | Male   | 1.97 | 15.30 | 22.65 | 19.37 | Yes | No  | Yes | No | 1844.4 | 9.1  |
| 341 | Control | 2018-12-31 | 65 | Male   | 2.22 | 5.50  | 2.00  | 19.69 | Yes | Yes | Yes | No | 202.9  | 2.2  |
| 342 | Control | 2018-12-31 | 61 | Male   | 3.29 | 6.90  | 4.94  | 24.89 | No  | No  | Yes | No | 1487.3 | 11.7 |
| 343 | Control | 2018-12-31 | 62 | Male   | 2.24 | 4.40  | 12.72 | 25.86 | No  | No  | Yes | No | 2191.7 | 11.5 |
| 344 | Control | 2018-12-31 | 57 | Female | 3.54 | 6.00  | 26.46 | 23.77 | No  | No  | Yes | No | 415.5  | 6.3  |
| 345 | Control | 2018-12-31 | 61 | Male   | 1.05 | 4.80  | 10.17 | 24.91 | Yes | No  | Yes | No | 642.6  | 6.8  |
| 346 | Control | 2018-12-31 | 60 | Female | 0.54 | 7.60  | 2.20  | 24.70 | No  | No  | Yes | No | 1327.3 | 7.6  |
| 347 | Control | 2018-12-31 | 61 | Male   | 2.92 | 5.00  | 20.92 | 23.15 | No  | Yes | Yes | No | 1136.8 | 4.0  |
| 348 | Control | 2018-12-31 | 60 | Female | 1.54 | 6.30  | 4.81  | 24.65 | No  | No  | Yes | No | 1336.0 | 8.0  |
| 349 | Control | 2018-12-31 | 58 | Male   | 2.93 | 9.10  | 7.35  | 25.36 | Yes | Yes | Yes | No | 364.4  | 9.4  |
| 350 | Control | 2018-12-31 | 69 | Male   | 2.93 | 10.50 | 12.46 | 19.25 | Yes | Yes | Yes | No | 1310.1 | 10.3 |
| 351 | Control | 2018-12-31 | 72 | Male   | 1.90 | 5.96  | 7.79  | 18.87 | Yes | Yes | Yes | No | 1637.1 | 2.8  |
| 352 | Control | 2018-12-31 | 67 | Male   | 2.25 | 8.10  | 16.18 | 25.22 | Yes | Yes | Yes | No | 1285.6 | 11.5 |
| 353 | Control | 2018-12-31 | 75 | Female | 1.48 | 14.10 | 6.16  | 21.22 | No  | No  | Yes | No | 1544.8 | 5.7  |
| 354 | Control | 2018-12-31 | 63 | Male   | 0.99 | 1.87  | 7.80  | 25.83 | No  | No  | Yes | No | 951.3  | 7.4  |
| 355 | Control | 2018-12-31 | 71 | Male   | 3.15 | 8.00  | 4.52  | 23.67 | Yes | No  | Yes | No | 1885.5 | 11.2 |
| 356 | Control | 2018-12-31 | 60 | Female | 1.75 | 17.00 | 4.20  | 25.96 | No  | No  | Yes | No | 302.0  | 8.4  |

|     |         |            |    |        |      |       |       |         |     |     |     |     |        |      |
|-----|---------|------------|----|--------|------|-------|-------|---------|-----|-----|-----|-----|--------|------|
| 357 | Control | 2018-12-31 | 62 | Male   | 2.58 | 9.30  | 29.69 | 28.15   | No  | No  | Yes | No  | 895.6  | 17.4 |
| 358 | Control | 2018-12-31 | 63 | Male   | 2.38 | 7.30  | 5.18  | 25.06   | Yes | No  | Yes | No  | 1524.2 | 6.1  |
| 359 | Control | 2018-12-31 | 63 | Female | 2.10 | 6.80  | 3.11  | 22.73   | No  | No  | Yes | No  | 1141.7 | 12.2 |
| 360 | Control | 2018-12-31 | 81 | Female | 2.27 | 8.70  | 3.90  | 19.91   | No  | No  | Yes | Yes | 1137.4 | 8.6  |
| 361 | Control | 2018-12-31 | 81 | Female | 1.71 | 10.30 | 4.09  | 25.14   | Yes | No  | Yes | No  | 699.6  | 10.8 |
| 362 | Control | 2018-12-31 | 79 | Female | 1.06 | 6.40  | 2.00  | Missing | No  | No  | Yes | No  | 1319.2 | 14.9 |
| 363 | Control | 2018-12-31 | 76 | Female | 3.67 | 12.70 | 2.54  | 27.87   | No  | No  | Yes | No  | 673.5  | 7.0  |
| 364 | Control | 2018-12-31 | 77 | Male   | 2.38 | 7.20  | 5.55  | 21.70   | No  | No  | Yes | No  | 1675.3 | 4.5  |
| 365 | Control | 2018-12-31 | 72 | Female | 1.60 | 5.70  | 5.68  | 20.23   | No  | No  | Yes | Yes | 1795.6 | 10.3 |
| 366 | Control | 2018-12-31 | 72 | Female | 2.08 | 17.90 | 7.05  | 25.40   | No  | No  | Yes | No  | 1213.8 | 1.6  |
| 367 | Control | 2018-12-31 | 70 | Female | 0.86 | 8.40  | 7.17  | 21.79   | No  | No  | Yes | No  | 380.2  | 4.2  |
| 368 | Control | 2018-12-31 | 69 | Male   | 1.65 | 6.70  | 16.72 | 25.16   | Yes | No  | Yes | No  | 394.0  | 5.7  |
| 369 | Control | 2018-12-31 | 59 | Male   | 2.31 | 13.30 | 2.00  | 23.44   | Yes | Yes | Yes | No  | 546.3  | 11.0 |
| 370 | Control | 2018-12-31 | 59 | Male   | 4.71 | 8.30  | 8.07  | 22.96   | Yes | Yes | Yes | No  | 300.2  | 6.3  |
| 371 | Control | 2018-12-31 | 60 | Male   | 2.03 | 4.60  | 15.03 | 21.45   | Yes | Yes | Yes | No  | 326.5  | 6.5  |
| 372 | Control | 2018-12-31 | 66 | Female | 1.32 | 11.70 | 9.74  | 26.11   | No  | Yes | Yes | No  | 347.1  | 6.9  |
| 373 | Control | 2018-12-31 | 58 | Male   | 0.97 | 6.85  | 32.73 | 26.69   | Yes | Yes | Yes | No  | 1480.6 | 10.5 |
| 374 | Control | 2018-12-31 | 58 | Male   | 0.56 | 0.12  | 7.56  | 21.90   | Yes | Yes | Yes | No  | 1282.0 | 5.9  |
| 375 | Control | 2018-12-31 | 63 | Female | 0.54 | 14.46 | 8.45  | 24.30   | No  | No  | Yes | Yes | 2748.0 | 7.5  |
| 376 | Control | 2018-12-31 | 72 | Male   | 2.56 | 4.70  | 21.62 | 20.73   | No  | Yes | Yes | No  | 1698.9 | 4.9  |
| 377 | Control | 2018-12-31 | 76 | Male   | 1.46 | 0.45  | 6.10  | 21.30   | No  | Yes | Yes | No  | 664.6  | 12.2 |
| 378 | Control | 2018-12-31 | 57 | Female | 0.94 | 5.72  | 20.49 | 19.95   | No  | No  | Yes | No  | 304.4  | 6.9  |
| 379 | Control | 2018-12-31 | 67 | Male   | 1.34 | 2.88  | 7.25  | 24.22   | Yes | Yes | Yes | No  | 1643.0 | 5.1  |
| 380 | Control | 2018-12-31 | 69 | Male   | 1.85 | 1.26  | 11.81 | 28.37   | Yes | Yes | Yes | No  | 1661.2 | 6.9  |
| 381 | Control | 2018-12-31 | 69 | Female | 0.48 | 7.43  | 12.44 | 25.48   | No  | No  | Yes | No  | 1576.7 | 6.6  |
| 382 | Control | 2018-12-31 | 63 | Female | 1.05 | 2.22  | 10.78 | 22.85   | No  | No  | No  | No  | 1178.3 | 2.4  |
| 383 | Control | 2018-12-31 | 62 | Male   | 3.81 | 1.60  | 0.01  | 26.43   | Yes | Yes | Yes | No  | 1104.9 | 7.4  |
| 384 | Control | 2018-12-31 | 60 | Male   | 2.25 | 9.70  | 3.96  | 28.52   | No  | Yes | Yes | No  | 1174.9 | 9.1  |

|     |         |            |    |        |      |       |       |       |     |     |         |         |        |      |
|-----|---------|------------|----|--------|------|-------|-------|-------|-----|-----|---------|---------|--------|------|
| 385 | Control | 2018-12-31 | 58 | Female | 0.82 | 15.30 | 2.43  | 24.65 | No  | No  | Yes     | No      | 476.0  | 4.7  |
| 386 | Control | 2018-12-31 | 56 | Female | 0.86 | 15.30 | 3.89  | 24.62 | No  | No  | Yes     | No      | 1495.6 | 11.2 |
| 387 | Control | 2018-12-31 | 62 | Male   | 2.33 | 4.80  | 11.15 | 24.84 | Yes | Yes | Yes     | No      | 1293.0 | 7.7  |
| 388 | Control | 2018-12-31 | 59 | Female | 1.94 | 5.60  | 7.11  | 21.78 | No  | No  | Yes     | No      | 588.5  | 3.6  |
| 389 | Control | 2018-12-31 | 61 | Male   | 3.16 | 10.50 | 16.80 | 20.69 | Yes | Yes | Yes     | No      | 1500.0 | 8.4  |
| 390 | Control | 2018-12-31 | 62 | Male   | 4.56 | 7.40  | 4.26  | 21.16 | Yes | No  | Yes     | No      | 410.8  | 4.2  |
| 391 | Control | 2018-12-31 | 61 | Female | 0.92 | 4.55  | 0.00  | 32.66 | Yes | Yes | Missing | Missing | 1076.4 | 7.0  |
| 392 | Control | 2018-12-31 | 63 | Male   | 4.00 | 0.44  | 0.08  | 23.42 | Yes | No  | Yes     | No      | 1651.0 | 7.6  |
| 393 | Control | 2018-12-31 | 59 | Male   | 0.54 | 0.26  | 4.31  | 30.86 | Yes | No  | No      | No      | 1120.7 | 5.5  |
| 394 | Control | 2018-12-31 | 59 | Male   | 1.47 | 0.01  | 1.86  | 25.06 | Yes | Yes | Yes     | No      | 1879.2 | 5.1  |
| 395 | Control | 2018-12-31 | 50 | Female | 0.85 | 12.19 | 12.72 | 24.46 | No  | No  | Yes     | No      | 1474.1 | 11.5 |
| 396 | Control | 2018-12-31 | 78 | Male   | 1.56 | 0.71  | 12.38 | 26.49 | No  | No  | No      | No      | 1144.3 | 15.2 |
| 397 | Control | 2018-12-31 | 77 | Male   | 3.77 | 0.73  | 31.61 | 21.19 | Yes | No  | Yes     | No      | 1032.1 | 5.0  |
| 398 | Control | 2018-12-31 | 66 | Female | 0.44 | 1.11  | 15.59 | 22.21 | No  | No  | Yes     | No      | 430.3  | 3.1  |
| 399 | Control | 2018-12-31 | 78 | Male   | 0.29 | 0.47  | 1.79  | 22.99 | No  | No  | Yes     | Yes     | 1652.4 | 4.3  |
| 400 | Control | 2018-12-31 | 75 | Male   | 3.60 | 5.33  | 19.34 | 23.05 | Yes | Yes | No      | No      | 1233.8 | 11.2 |
| 401 | Control | 2018-12-31 | 75 | Male   | 2.26 | 0.58  | 0.02  | 20.20 | No  | Yes | Yes     | No      | 1475.5 | 12.5 |
| 402 | Control | 2018-12-31 | 70 | Male   | 2.77 | 0.67  | 0.01  | 25.21 | Yes | No  | No      | No      | 367.1  | 11.0 |
| 403 | Control | 2018-12-31 | 66 | Male   | 1.32 | 3.57  | 7.65  | 25.56 | No  | Yes | Yes     | No      | 1090.9 | 4.5  |
| 404 | Control | 2018-12-31 | 61 | Male   | 1.72 | 2.39  | 12.16 | 26.70 | Yes | No  | Yes     | No      | 855.5  | 4.7  |
| 405 | Control | 2018-12-31 | 65 | Male   | 1.77 | 0.16  | 29.31 | 23.05 | No  | No  | No      | No      | 1755.8 | 6.6  |
| 406 | Control | 2018-12-31 | 64 | Female | 2.38 | 1.59  | 13.46 | 30.33 | No  | No  | Yes     | No      | 1695.6 | 2.4  |
| 407 | Control | 2018-12-31 | 73 | Male   | 2.19 | 1.56  | 24.31 | 23.34 | No  | No  | Yes     | No      | 1127.2 | 13.1 |
| 408 | Control | 2018-12-31 | 67 | Male   | 0.48 | 4.89  | 15.70 | 23.33 | Yes | No  | Yes     | Missing | 1036.6 | 11.1 |
| 409 | Control | 2018-12-31 | 63 | Female | 2.98 | 0.30  | 13.35 | 18.90 | No  | No  | Yes     | No      | 1164.2 | 4.5  |
| 410 | Control | 2018-12-31 | 66 | Male   | 2.93 | 3.00  | 10.40 | 24.39 | Yes | Yes | Yes     | No      | 1445.1 | 9.3  |
| 411 | Control | 2018-12-31 | 65 | Male   | 3.46 | 4.97  | 24.23 | 27.08 | No  | Yes | Yes     | No      | 1381.6 | 5.9  |
| 412 | Control | 2018-12-31 | 64 | Male   | 0.52 | 0.47  | 8.13  | 20.08 | Yes | No  | Yes     | No      | 1274.1 | 7.9  |

|     |         |            |    |        |      |       |       |       |     |     |         |         |        |      |
|-----|---------|------------|----|--------|------|-------|-------|-------|-----|-----|---------|---------|--------|------|
| 413 | Control | 2018-12-31 | 74 | Male   | 0.61 | 1.23  | 4.78  | 25.91 | Yes | Yes | Yes     | No      | 103.7  | 3.9  |
| 414 | Control | 2018-12-31 | 58 | Female | 3.52 | 1.07  | 13.39 | 25.21 | No  | No  | Yes     | No      | 1337.0 | 12.5 |
| 415 | Control | 2018-12-31 | 69 | Male   | 3.11 | 1.64  | 20.43 | 22.86 | Yes | Yes | Yes     | No      | 1643.1 | 16.0 |
| 416 | Control | 2018-12-31 | 62 | Male   | 1.70 | 7.89  | 13.01 | 22.27 | No  | No  | Yes     | No      | 1176.3 | 12.1 |
| 417 | Control | 2018-12-31 | 72 | Male   | 0.62 | 4.60  | 12.38 | 27.04 | No  | Yes | Yes     | No      | 1797.2 | 10.9 |
| 418 | Control | 2018-12-31 | 67 | Male   | 1.00 | 2.43  | 9.40  | 26.67 | Yes | No  | Yes     | No      | 1849.4 | 4.5  |
| 419 | Control | 2018-12-31 | 81 | Male   | 1.57 | 3.14  | 26.08 | 24.84 | Yes | Yes | Yes     | No      | 1259.7 | 5.1  |
| 420 | Control | 2018-12-31 | 73 | Male   | 0.00 | 6.80  | 0.00  | 24.11 | Yes | No  | No      | No      | 1111.1 | 14.1 |
| 421 | Control | 2018-12-31 | 64 | Male   | 0.55 | 5.73  | 18.53 | 25.39 | Yes | No  | Yes     | No      | 1155.8 | 14.4 |
| 422 | Control | 2018-12-31 | 72 | Female | 0.22 | 0.36  | 4.82  | 19.61 | No  | No  | Yes     | No      | 335.9  | 5.4  |
| 423 | Control | 2018-12-31 | 59 | Female | 0.49 | 0.19  | 10.78 | 27.25 | No  | No  | Yes     | No      | 313.6  | 8.5  |
| 424 | Control | 2018-12-31 | 62 | Male   | 2.39 | 4.01  | 10.59 | 23.94 | Yes | Yes | Yes     | No      | 320.1  | 4.2  |
| 425 | Control | 2018-12-31 | 62 | Male   | 1.41 | 0.01  | 0.01  | 20.38 | Yes | No  | Yes     | Yes     | 651.8  | 8.3  |
| 426 | Control | 2018-12-31 | 62 | Female | 0.87 | 7.90  | 31.71 | 25.77 | No  | No  | No      | No      | 504.5  | 7.0  |
| 427 | Control | 2018-12-31 | 63 | Male   | 4.50 | 2.05  | 1.81  | 21.47 | No  | Yes | Yes     | No      | 1507.3 | 7.0  |
| 428 | Control | 2018-12-31 | 68 | Female | 0.88 | 0.79  | 28.38 | 23.73 | No  | No  | Yes     | No      | 323.5  | 2.6  |
| 429 | Control | 2018-12-31 | 63 | Male   | 2.36 | 2.01  | 21.26 | 17.90 | Yes | Yes | No      | Missing | 474.5  | 3.5  |
| 430 | Control | 2018-12-31 | 63 | Male   | 3.35 | 0.44  | 0.01  | 21.72 | No  | Yes | Yes     | No      | 1520.6 | 2.8  |
| 431 | Control | 2018-12-31 | 66 | Male   | 1.89 | 0.24  | 19.63 | 31.90 | No  | No  | Yes     | No      | 757.7  | 5.9  |
| 432 | Control | 2018-12-31 | 62 | Male   | 0.91 | 2.56  | 4.02  | 23.72 | Yes | Yes | Yes     | No      | 1876.8 | 9.6  |
| 433 | Control | 2018-12-31 | 62 | Male   | 2.50 | 1.90  | 21.16 | 20.98 | Yes | Yes | Yes     | No      | 357.1  | 0.5  |
| 434 | Control | 2018-12-31 | 62 | Male   | 0.10 | 0.82  | 4.24  | 19.49 | Yes | No  | No      | No      | 565.5  | 9.9  |
| 435 | Control | 2018-12-31 | 62 | Male   | 4.12 | 1.15  | 10.26 | 21.22 | Yes | No  | Yes     | No      | 1049.3 | 5.9  |
| 436 | Control | 2018-12-31 | 64 | Male   | 1.30 | 2.08  | 20.85 | 25.35 | Yes | Yes | Yes     | No      | 401.1  | 15.9 |
| 437 | Control | 2018-12-31 | 66 | Male   | 0.94 | 1.20  | 2.4   | 22.49 | Yes | Yes | Missing | Missing | 2903.8 | 6.5  |
| 438 | Control | 2018-12-31 | 78 | Male   | 0.68 | 13.22 | 3.72  | 27.48 | No  | Yes | Missing | Missing | 2528.0 | 6.2  |
| 439 | Control | 2018-12-31 | 67 | Male   | 1.61 | 2.84  | 8.66  | 30.49 | No  | Yes | Missing | Missing | 522.1  | 9.8  |
| 440 | Control | 2018-12-31 | 81 | Female | 1.37 | 12.70 | 11.54 | 19.02 | No  | No  | Yes     | Yes     | 1226.4 | 4.9  |

|     |         |            |    |        |      |       |       |       |     |     |         |         |        |      |
|-----|---------|------------|----|--------|------|-------|-------|-------|-----|-----|---------|---------|--------|------|
| 441 | Control | 2018-12-31 | 75 | Male   | 1.19 | 13.00 | 3.95  | 25.14 | No  | No  | Yes     | No      | 1716.8 | 6.7  |
| 442 | Control | 2018-12-31 | 57 | Male   | 4.30 | 11.70 | 10.81 | 20.88 | Yes | No  | Yes     | No      | 185.0  | 12.7 |
| 443 | Control | 2018-12-31 | 61 | Male   | 2.41 | 11.40 | 4.66  | 24.87 | Yes | Yes | Yes     | No      | 1822.9 | 12.9 |
| 444 | Control | 2018-12-31 | 68 | Male   | 2.40 | 9.40  | 27.42 | 24.82 | No  | Yes | Yes     | No      | 1105.0 | 5.5  |
| 445 | Control | 2018-12-31 | 77 | Male   | 3.08 | 3.35  | 0.00  | 24.74 | Yes | Yes | Missing | Missing | 1661.7 | 6.8  |
| 446 | Control | 2018-12-31 | 65 | Male   | 4.69 | 9.90  | 20.66 | 21.23 | Yes | No  | Yes     | No      | 1485.6 | 6.5  |
| 447 | Control | 2018-12-31 | 64 | Male   | 1.79 | 6.60  | 5.33  | 23.31 | Yes | Yes | Yes     | No      | 1217.4 | 15.6 |
| 448 | Control | 2018-12-31 | 67 | Male   | 4.63 | 9.50  | 24.40 | 18.60 | No  | No  | Yes     | No      | 1188.6 | 5.0  |
| 449 | Control | 2018-12-31 | 67 | Female | 1.48 | 12.20 | 8.50  | 27.67 | No  | No  | Yes     | No      | 1258.7 | 4.5  |
| 450 | Control | 2018-12-31 | 68 | Male   | 0.59 | 3.95  | 10.13 | 19.20 | No  | No  | Yes     | Yes     | 1182.1 | 13.8 |
| 451 | Control | 2018-12-31 | 62 | Male   | 1.01 | 1.60  | 7.30  | 23.23 | Yes | Yes | Yes     | Missing | 127.0  | 5.5  |
| 452 | Control | 2018-12-31 | 69 | Male   | 0.96 | 4.79  | 9.26  | 22.68 | Yes | Yes | No      | No      | 1539.5 | 10.9 |
| 453 | Control | 2018-12-31 | 62 | Female | 0.66 | 0.23  | 20.97 | 32.79 | No  | No  | Yes     | No      | 1699.5 | 1.3  |
| 454 | Control | 2018-12-31 | 63 | Male   | 0.58 | 0.52  | 11.21 | 28.40 | No  | No  | Yes     | No      | 1595.0 | 6.5  |
| 455 | Control | 2018-12-31 | 74 | Male   | 0.72 | 4.05  | 7.25  | 25.65 | No  | No  | Yes     | No      | 1127.1 | 9.3  |
| 456 | Control | 2018-12-31 | 74 | Female | 0.16 | 0.88  | 2.15  | 21.48 | No  | No  | Yes     | No      | 1330.7 | 8.2  |
| 457 | Control | 2018-12-31 | 77 | Female | 2.20 | 2.00  | 6.90  | 23.73 | No  | No  | Yes     | No      | 1054.3 | 4.5  |
| 458 | Control | 2018-12-31 | 72 | Female | 0.79 | 1.76  | 34.20 | 25.88 | No  | Yes | No      | Missing | 1250.4 | 8.8  |
| 459 | Control | 2018-12-31 | 71 | Male   | 3.40 | 1.40  | 0.01  | 24.68 | Yes | No  | Yes     | No      | 1510.3 | 9.4  |
| 460 | Control | 2018-12-31 | 62 | Male   | 3.42 | 3.23  | 3.28  | 23.51 | Yes | No  | Missing | Missing | 1432.2 | 16.4 |
| 461 | Control | 2018-12-31 | 74 | Male   | 2.28 | 0.52  | 27.76 | 22.27 | Yes | No  | Yes     | No      | 126.6  | 11.3 |
| 462 | Control | 2018-12-31 | 58 | Female | 1.99 | 0.16  | 0.01  | 20.72 | Yes | No  | Yes     | No      | 1711.8 | 9.5  |
| 463 | Control | 2018-12-31 | 58 | Male   | 1.01 | 0.45  | 5.52  | 24.39 | Yes | No  | Yes     | No      | 1308.2 | 5.1  |
| 464 | Control | 2018-12-31 | 60 | Female | 1.36 | 10.42 | 15.06 | 27.18 | No  | No  | Yes     | No      | 960.7  | 6.2  |
| 465 | Control | 2018-12-31 | 68 | Male   | 0.40 | 0.60  | 4.40  | 26.35 | No  | No  | Yes     | No      | 1812.7 | 8.6  |
| 466 | Control | 2018-12-31 | 70 | Male   | 2.20 | 0.10  | 5.20  | 16.73 | Yes | No  | Yes     | No      | 1197.7 | 8.3  |
| 467 | Control | 2018-12-31 | 77 | Male   | 1.56 | 9.43  | 24.87 | 23.71 | Yes | No  | Yes     | No      | 1227.7 | 5.4  |
| 468 | Control | 2018-12-31 | 61 | Female | 0.26 | 0.43  | 3.65  | 21.97 | No  | No  | Yes     | No      | 934.7  | 10.2 |

|     |         |            |    |        |      |       |       |       |     |     |         |         |        |      |
|-----|---------|------------|----|--------|------|-------|-------|-------|-----|-----|---------|---------|--------|------|
| 469 | Control | 2018-12-31 | 64 | Male   | 2.64 | 4.26  | 0.00  | 22.10 | Yes | Yes | Missing | Missing | 3144.9 | 6.8  |
| 470 | Control | 2018-12-31 | 69 | Female | 0.78 | 0.07  | 3.85  | 26.14 | No  | No  | Yes     | No      | 1041.3 | 5.1  |
| 471 | Control | 2018-12-31 | 60 | Female | 0.58 | 0.34  | 9.09  | 23.81 | No  | No  | No      | No      | 1339.9 | 5.6  |
| 472 | Control | 2018-12-31 | 62 | Female | 2.47 | 1.92  | 22.04 | 22.05 | No  | No  | Yes     | No      | 573.9  | 8.2  |
| 473 | Control | 2018-12-31 | 62 | Male   | 2.03 | 7.20  | 4.41  | 26.67 | No  | Yes | Yes     | No      | 488.8  | 6.9  |
| 474 | Control | 2018-12-31 | 64 | Male   | 1.44 | 1.00  | 16.50 | 21.95 | Yes | No  | Yes     | No      | 1143.9 | 3.1  |
| 475 | Control | 2018-12-31 | 63 | Female | 0.13 | 0.01  | 15.41 | 19.43 | No  | No  | Yes     | No      | 1481.7 | 7.0  |
| 476 | Control | 2018-12-31 | 66 | Male   | 2.87 | 0.62  | 15.13 | 20.50 | Yes | Yes | Yes     | No      | 1532.5 | 3.8  |
| 477 | Control | 2018-12-31 | 64 | Male   | 0.91 | 6.05  | 3.02  | 24.31 | No  | No  | Missing | Missing | 3353.8 | 4.6  |
| 478 | Control | 2018-12-31 | 69 | Female | 0.59 | 3.36  | 5.37  | 27.23 | No  | No  | Yes     | No      | 1149.0 | 6.1  |
| 479 | Control | 2018-12-31 | 68 | Male   | 4.94 | 7.20  | 6.41  | 23.15 | No  | No  | Yes     | No      | 1304.0 | 6.1  |
| 480 | Control | 2018-12-31 | 68 | Male   | 1.81 | 13.10 | 8.65  | 24.96 | Yes | Yes | Yes     | No      | 1146.9 | 12.7 |
| 481 | Control | 2018-12-31 | 66 | Male   | 2.39 | 4.00  | 6.48  | 27.24 | No  | No  | Yes     | No      | 1369.5 | 8.9  |
| 482 | Control | 2018-12-31 | 71 | Male   | 2.84 | 9.60  | 6.83  | 21.09 | Yes | No  | Yes     | No      | 1127.7 | 8.4  |
| 483 | Control | 2018-12-31 | 64 | Male   | 2.27 | 9.70  | 18.91 | 24.38 | Yes | Yes | Yes     | No      | 613.3  | 9.2  |
| 484 | Control | 2018-12-31 | 80 | Male   | 3.16 | 5.50  | 8.72  | 23.94 | Yes | Yes | Yes     | No      | 1647.7 | 4.5  |
| 485 | Control | 2018-12-31 | 67 | Female | 2.03 | 8.20  | 7.75  | 21.36 | No  | No  | Yes     | No      | 1266.9 | 12.1 |
| 486 | Control | 2018-12-31 | 61 | Female | 2.09 | 14.20 | 11.58 | 23.15 | No  | No  | Yes     | No      | 977.2  | 5.5  |
| 487 | Control | 2018-12-31 | 66 | Male   | 2.38 | 5.90  | 4.21  | 28.31 | No  | No  | Yes     | No      | 1112.3 | 4.8  |
| 488 | Control | 2018-12-31 | 63 | Male   | 1.37 | 9.90  | 6.97  | 20.44 | Yes | Yes | Yes     | No      | 1583.2 | 15.1 |
| 489 | Control | 2018-12-31 | 59 | Male   | 1.83 | 7.30  | 28.23 | 17.79 | No  | No  | Yes     | No      | 1720.4 | 11.0 |
| 490 | Control | 2018-12-31 | 78 | Male   | 1.77 | 5.10  | 3.36  | 20.60 | No  | No  | Yes     | No      | 1154.0 | 2.9  |
| 491 | Control | 2018-12-31 | 71 | Male   | 2.57 | 6.30  | 7.04  | 22.70 | Yes | Yes | Yes     | No      | 1561.6 | 1.9  |
| 492 | Control | 2018-12-31 | 72 | Male   | 3.32 | 5.90  | 25.95 | 25.51 | Yes | Yes | Yes     | No      | 1028.5 | 6.2  |
| 493 | Control | 2018-12-31 | 64 | Male   | 2.52 | 3.70  | 2.61  | 17.66 | No  | No  | Yes     | No      | 1478.0 | 7.0  |
| 494 | Control | 2018-12-31 | 62 | Male   | 4.21 | 19.00 | 7.21  | 26.50 | Yes | No  | Yes     | No      | 1469.0 | 11.0 |
| 495 | Control | 2018-12-31 | 63 | Male   | 3.27 | 13.70 | 24.98 | 24.62 | No  | No  | Yes     | No      | 1279.8 | 2.4  |
| 496 | Control | 2018-12-31 | 57 | Female | 2.46 | 2.45  | 5.46  | 28.76 | No  | No  | Yes     | No      | 179.2  | 6.2  |

|     |         |            |    |        |      |        |       |       |     |     |         |         |        |      |
|-----|---------|------------|----|--------|------|--------|-------|-------|-----|-----|---------|---------|--------|------|
| 497 | Control | 2018-12-31 | 64 | Male   | 0.77 | 4.57   | 2.9   | 24.24 | No  | Yes | Missing | No      | 799.2  | 7.6  |
| 498 | Control | 2018-12-31 | 64 | Male   | 2.35 | 7.90   | 3.49  | 20.96 | No  | No  | Yes     | No      | 520.2  | 9.5  |
| 499 | Control | 2018-12-31 | 71 | Male   | 4.33 | 14.90  | 34.09 | 20.66 | Yes | Yes | Yes     | No      | 1105.9 | 5.4  |
| 500 | Control | 2018-12-31 | 66 | Male   | 3.59 | 7.70   | 19.79 | 24.03 | No  | No  | Yes     | No      | 2132.1 | 10.2 |
| 501 | Control | 2018-12-31 | 59 | Female | 2.89 | 15.60  | 2.00  | 16.45 | No  | No  | Missing | No      | 1253.7 | 7.1  |
| 502 | Control | 2018-12-31 | 57 | Female | 2.10 | 8.20   | 17.63 | 26.25 | No  | No  | Yes     | No      | 352.7  | 3.9  |
| 503 | Control | 2018-12-31 | 57 | Female | 9.57 | 169.30 | 2.00  | 21.91 | No  | No  | Yes     | No      | 807.7  | 12.8 |
| 504 | Control | 2018-12-31 | 62 | Male   | 1.63 | 3.79   | 4.21  | 22.86 | No  | Yes | Missing | Missing | 859.7  | 9.8  |
| 505 | Control | 2018-12-31 | 65 | Male   | 0.73 | 0.83   | 11.11 | 20.31 | Yes | Yes | Yes     | No      | 1584.8 | 18.2 |
| 506 | Control | 2018-12-31 | 71 | Male   | 1.02 | 0.33   | 14.21 | 23.15 | Yes | Yes | Yes     | No      | 1172.9 | 7.2  |
| 507 | Control | 2018-12-31 | 55 | Male   | 0.36 | 0.13   | 12.94 | 21.72 | Yes | No  | Yes     | No      | 1756.6 | 9.2  |
| 508 | Control | 2018-12-31 | 68 | Male   | 0.65 | 1.20   | 11.40 | 28.84 | Yes | No  | Yes     | No      | 1181.2 | 7.0  |
| 509 | Control | 2018-12-31 | 70 | Female | 0.59 | 0.43   | 3.91  | 24.24 | No  | No  | Yes     | Yes     | 1296.2 | 7.2  |
| 510 | Control | 2018-12-31 | 76 | Female | 0.45 | 0.30   | 3.22  | 20.66 | No  | No  | Yes     | No      | 1293.0 | 8.3  |
| 511 | Control | 2018-12-31 | 59 | Male   | 1.12 | 0.43   | 12.76 | 26.18 | No  | No  | Yes     | No      | 958.1  | 9.4  |
| 512 | Control | 2018-12-31 | 55 | Female | 4.29 | 8.68   | 34.79 | 23.31 | No  | No  | Yes     | No      | 1145.3 | 8.6  |
| 513 | Control | 2018-12-31 | 61 | Female | 2.74 | 0.20   | 15.35 | 22.52 | No  | No  | Yes     | No      | 1642.2 | 9.0  |
| 514 | Control | 2018-12-31 | 71 | Female | 1.61 | 5.60   | 20.27 | 20.24 | No  | No  | Yes     | No      | 306.4  | 4.7  |
| 515 | Control | 2018-12-31 | 76 | Female | 1.41 | 4.58   | 9     | 18.23 | No  | No  | Yes     | No      | 1032.8 | 3.2  |
| 516 | Control | 2018-12-31 | 85 | Male   | 0.20 | 1.04   | 4.42  | 27.89 | No  | No  | Yes     | No      | 1238.5 | 6.4  |
| 517 | Control | 2018-12-31 | 61 | Male   | 1.31 | 4.33   | 4.31  | 23.46 | Yes | Yes | Yes     | No      | 749.2  | 4.9  |
| 518 | Control | 2018-12-31 | 62 | Male   | 1.46 | 17.70  | 11.17 | 25.68 | Yes | No  | Yes     | No      | 1191.9 | 7.1  |
| 519 | Control | 2018-12-31 | 64 | Female | 1.19 | 5.80   | 16.22 | 22.66 | No  | No  | Yes     | No      | 1809.1 | 6.4  |
| 520 | Control | 2018-12-31 | 62 | Male   | 2.13 | 10.30  | 3.34  | 20.81 | Yes | No  | Yes     | No      | 1814.3 | 3.2  |
| 521 | Control | 2018-12-31 | 62 | Female | 0.58 | 5.10   | 2.73  | 19.31 | No  | No  | Yes     | No      | 635.5  | 9.5  |
| 522 | Control | 2018-12-31 | 59 | Female | 1.34 | 8.90   | 8.59  | 24.28 | No  | No  | Yes     | No      | 435.2  | 5.2  |
| 523 | Control | 2018-12-31 | 80 | Male   | 2.60 | 16.30  | 13.63 | 25.15 | Yes | Yes | Yes     | No      | 227.7  | 10.3 |
| 524 | Control | 2018-12-31 | 61 | Male   | 2.82 | 8.00   | 10.01 | 20.96 | No  | No  | No      | No      | 1364.9 | 6.4  |



|     |         |            |    |        |      |       |       |       |     |     |         |         |        |      |
|-----|---------|------------|----|--------|------|-------|-------|-------|-----|-----|---------|---------|--------|------|
| 525 | Control | 2018-12-31 | 61 | Female | 2.56 | 8.30  | 22.16 | 22.55 | No  | Yes | No      | Yes     | 1541.2 | 12.0 |
| 526 | Control | 2018-12-31 | 65 | Male   | 2.33 | 7.20  | 4.56  | 23.52 | Yes | Yes | Yes     | No      | 358.3  | 6.5  |
| 527 | Control | 2018-12-31 | 66 | Male   | 1.06 | 2.89  | 7.7   | 27.61 | No  | No  | Missing | Missing | 1095.2 | 6.7  |
| 528 | Control | 2018-12-31 | 58 | Female | 1.62 | 9.50  | 3.87  | 22.88 | No  | No  | Yes     | No      | 685.5  | 12.3 |
| 529 | Control | 2018-12-31 | 75 | Male   | 2.23 | 7.60  | 3.78  | 25.49 | Yes | Yes | Yes     | No      | 971.7  | 8.0  |
| 530 | Control | 2018-12-31 | 68 | Female | 1.59 | 9.50  | 4.03  | 29.76 | No  | No  | Yes     | No      | 1334.0 | 11.8 |
| 531 | Control | 2018-12-31 | 71 | Male   | 2.06 | 7.10  | 10.10 | 22.98 | Yes | Yes | Yes     | No      | 1274.4 | 5.4  |
| 532 | Control | 2018-12-31 | 72 | Female | 1.08 | 13.50 | 8.63  | 20.24 | No  | No  | Yes     | No      | 359.6  | 2.8  |
| 533 | Control | 2018-12-31 | 76 | Female | 1.39 | 10.50 | 14.15 | 22.52 | No  | No  | Yes     | No      | 575.6  | 6.3  |
| 534 | Control | 2018-12-31 | 74 | Male   | 1.72 | 13.10 | 3.25  | 19.90 | Yes | Yes | Yes     | No      | 587.4  | 1.6  |
| 535 | Control | 2018-12-31 | 69 | Male   | 2.93 | 18.10 | 36.59 | 19.26 | Yes | Yes | Yes     | No      | 1344.2 | 3.7  |
| 536 | Control | 2018-12-31 | 78 | Male   | 0.69 | 5.67  | 2.33  | 20.93 | Yes | Yes | Missing | Missing | 3245.6 | 8.2  |
| 537 | Control | 2018-12-31 | 65 | Female | 0.82 | 0.72  | 13.00 | 21.63 | No  | No  | Yes     | Yes     | 166.5  | 7.6  |
| 538 | Control | 2018-12-31 | 62 | Male   | 2.26 | 0.01  | 7.04  | 19.24 | Yes | No  | No      | No      | 214.9  | 16.1 |
| 539 | Control | 2018-12-31 | 59 | Male   | 1.40 | 0.72  | 3.75  | 26.47 | No  | No  | No      | No      | 206.2  | 2.5  |
| 540 | Control | 2018-12-31 | 70 | Female | 1.09 | 6.70  | 8.25  | 27.34 | No  | No  | No      | Yes     | 1286.0 | 13.4 |
| 541 | Control | 2018-12-31 | 68 | Male   | 1.01 | 3.52  | 33.93 | 22.33 | Yes | Yes | Yes     | No      | 1129.5 | 10.2 |
| 542 | Control | 2018-12-31 | 66 | Male   | 3.42 | 1.14  | 7.12  | 21.94 | Yes | Yes | Yes     | No      | 1409.4 | 7.6  |
| 543 | Control | 2018-12-31 | 77 | Female | 0.57 | 1.01  | 17.28 | 19.06 | No  | No  | Yes     | No      | 339.1  | 3.0  |
| 544 | Control | 2018-12-31 | 62 | Male   | 4.29 | 8.15  | 19.33 | 17.47 | Yes | Yes | Yes     | No      | 1055.3 | 12.5 |
| 545 | Control | 2018-12-31 | 69 | Male   | 2.01 | 8.18  | 20.16 | 25.43 | No  | No  | No      | No      | 903.9  | 10.4 |
| 546 | Control | 2018-12-31 | 49 | Male   | 0.23 | 0.01  | 3.23  | 24.36 | Yes | No  | No      | No      | 367.8  | 4.2  |
| 547 | Control | 2018-12-31 | 62 | Male   | 2.17 | 2.88  | 3.44  | 22.50 | No  | Yes | Missing | Missing | 1108.9 | 6.2  |
| 548 | Control | 2018-12-31 | 69 | Female | 1.09 | 5.70  | 10.08 | 20.28 | No  | No  | Yes     | No      | 566.3  | 12.3 |
| 549 | Control | 2018-12-31 | 56 | Female | 0.70 | 2.73  | 5.38  | 24.52 | No  | No  | Missing | Missing | 246.3  | 1.7  |
| 550 | Control | 2018-12-31 | 63 | Female | 1.44 | 7.70  | 7.17  | 24.12 | No  | No  | Yes     | No      | 1727.1 | 11.4 |
| 551 | Control | 2018-12-31 | 73 | Female | 2.31 | 13.20 | 22.39 | 25.10 | No  | No  | Yes     | No      | 1498.4 | 8.3  |
| 552 | Control | 2018-12-31 | 70 | Male   | 2.83 | 7.50  | 10.12 | 23.42 | No  | No  | Yes     | No      | 1275.4 | 5.1  |

|     |         |            |    |        |      |       |       |       |     |     |         |         |        |      |
|-----|---------|------------|----|--------|------|-------|-------|-------|-----|-----|---------|---------|--------|------|
| 553 | Control | 2018-12-31 | 73 | Female | 1.77 | 3.80  | 21.27 | 23.12 | No  | No  | Yes     | Yes     | 1649.5 | 8.4  |
| 554 | Control | 2018-12-31 | 74 | Male   | 1.43 | 10.70 | 10.30 | 28.73 | No  | No  | No      | No      | 1214.8 | 7.5  |
| 555 | Control | 2018-12-31 | 74 | Male   | 3.20 | 0.60  | 24.40 | 22.10 | Yes | Yes | Yes     | No      | 640.6  | 9.8  |
| 556 | Control | 2018-12-31 | 75 | Female | 1.69 | 1.69  | 24.66 | 24.98 | No  | No  | Yes     | No      | 1002.4 | 7.4  |
| 557 | Control | 2018-12-31 | 67 | Male   | 1.58 | 2.73  | 7.72  | 29.76 | Yes | Yes | Missing | Missing | 1429.6 | 10.5 |
| 558 | Control | 2018-12-31 | 56 | Female | 2.08 | 7.80  | 11.56 | 28.68 | No  | No  | Yes     | Yes     | 1538.9 | 11.3 |
| 559 | Control | 2018-12-31 | 72 | Female | 1.37 | 8.60  | 2.56  | 25.27 | No  | No  | Yes     | No      | 1182.1 | 2.5  |
| 560 | Control | 2018-12-31 | 70 | Female | 1.45 | 6.30  | 10.36 | 20.95 | No  | Yes | Yes     | No      | 1449.6 | 3.1  |
| 561 | Control | 2018-12-31 | 70 | Female | 1.44 | 5.90  | 6.12  | 26.23 | No  | No  | Yes     | No      | 1389.1 | 3.4  |
| 562 | Control | 2018-12-31 | 73 | Female | 3.04 | 17.80 | 8.83  | 24.34 | No  | No  | Yes     | No      | 1335.9 | 6.0  |
| 563 | Control | 2018-12-31 | 60 | Female | 1.64 | 5.40  | 5.62  | 21.23 | No  | No  | Yes     | No      | 200.6  | 6.4  |
| 564 | Control | 2018-12-31 | 56 | Female | 1.50 | 6.80  | 12.17 | 21.63 | No  | No  | No      | No      | 1002.5 | 10.1 |
| 565 | Control | 2018-12-31 | 68 | Female | 1.42 | 8.60  | 27.50 | 28.35 | No  | No  | No      | No      | 772.1  | 7.3  |
| 566 | Control | 2018-12-31 | 56 | Female | 0.92 | 3.60  | 4.98  | 23.23 | No  | No  | Yes     | No      | 1464.9 | 2.8  |
| 567 | Control | 2018-12-31 | 70 | Female | 1.00 | 17.30 | 8.04  | 21.75 | No  | No  | Yes     | No      | 1242.2 | 1.6  |
| 568 | Control | 2018-12-31 | 62 | Female | 1.21 | 2.45  | 2.57  | 22.60 | No  | No  | Missing | Missing | 1375.8 | 7.5  |
| 569 | Control | 2018-12-31 | 64 | Female | 1.86 | 2.24  | 16.51 | 25.92 | Yes | Yes | Missing | Missing | 2476.3 | 11.9 |
| 570 | Control | 2018-12-31 | 73 | Female | 0.10 | 0.89  | 7.41  | 19.38 | No  | No  | Yes     | No      | 1042.5 | 10.5 |
| 571 | Control | 2018-12-31 | 63 | Female | 0.33 | 1.71  | 3.10  | 26.00 | No  | Yes | Yes     | No      | 1578.6 | 9.3  |
| 572 | Control | 2018-12-31 | 71 | Female | 2.50 | 5.76  | 12.44 | 30.26 | No  | No  | Yes     | No      | 1532.2 | 10.9 |
| 573 | Control | 2018-12-31 | 72 | Female | 1.54 | 1.24  | 7.03  | 25.54 | No  | No  | Yes     | No      | 301.0  | 8.6  |
| 574 | Control | 2018-12-31 | 70 | Female | 0.76 | 0.16  | 5.99  | 31.56 | No  | No  | Yes     | No      | 1321.1 | 11.4 |
| 575 | Control | 2018-12-31 | 53 | Female | 0.85 | 7.31  | 12.83 | 29.55 | No  | No  | Missing | Missing | 2693.2 | 5.3  |
| 576 | Control | 2018-12-31 | 81 | Female | 1.51 | 0.29  | 4.15  | 19.91 | No  | No  | Yes     | No      | 158.1  | 7.0  |
| 577 | Control | 2018-12-31 | 77 | Female | 0.94 | 0.31  | 0.94  | 23.53 | No  | No  | Yes     | No      | 1283.2 | 10.2 |
| 578 | Control | 2018-12-31 | 60 | Female | 1.05 | 3.30  | 5.19  | 30.30 | No  | No  | Yes     | Missing | 2437.7 | 18.8 |
| 579 | Control | 2018-12-31 | 60 | Female | 0.77 | 4.73  | 2.14  | 26.00 | No  | No  | Yes     | Missing | 175.6  | 13.1 |
| 580 | Control | 2018-12-31 | 55 | Female | 1.50 | 1.20  | 13.30 | 23.87 | No  | No  | Yes     | No      | 2034.1 | 5.8  |

|     |         |            |    |        |      |       |       |       |     |     |         |         |        |      |
|-----|---------|------------|----|--------|------|-------|-------|-------|-----|-----|---------|---------|--------|------|
| 581 | Control | 2018-12-31 | 66 | Female | 2.30 | 3.50  | 3.70  | 22.19 | No  | No  | Yes     | No      | 260.5  | 6.4  |
| 582 | Control | 2018-12-31 | 77 | Female | 0.80 | 2.70  | 31.90 | 21.64 | No  | No  | Yes     | No      | 642.5  | 3.7  |
| 583 | Control | 2018-12-31 | 72 | Male   | 0.70 | 9.00  | 0.01  | 22.10 | Yes | Yes | Yes     | No      | 180.0  | 4.1  |
| 584 | Control | 2018-12-31 | 57 | Female | 0.81 | 2.86  | 0.00  | 20.78 | No  | No  | Missing | Missing | 1353.3 | 5.5  |
| 585 | Control | 2018-12-31 | 75 | Female | 1.93 | 18.80 | 8.85  | 21.18 | No  | No  | No      | No      | 1113.4 | 10.5 |
| 586 | Control | 2018-12-31 | 81 | Female | 1.13 | 3.40  | 4.53  | 22.99 | No  | No  | Yes     | No      | 1588.2 | 9.5  |
| 587 | Control | 2018-12-31 | 84 | Male   | 2.83 | 7.60  | 17.56 | 30.09 | Yes | No  | No      | No      | 1299.5 | 16.1 |
| 588 | Control | 2018-12-31 | 72 | Female | 2.50 | 9.60  | 26.17 | 18.82 | No  | No  | Yes     | No      | 1101.8 | 6.7  |
| 589 | Control | 2018-12-31 | 71 | Female | 1.70 | 4.50  | 19.73 | 23.31 | No  | No  | No      | No      | 1368.7 | 6.8  |
| 590 | Control | 2018-12-31 | 61 | Female | 1.85 | 12.70 | 6.66  | 20.89 | No  | No  | Yes     | No      | 487.1  | 6.6  |
| 591 | Control | 2018-12-31 | 59 | Female | 2.61 | 10.00 | 20.15 | 27.03 | No  | No  | Yes     | No      | 1733.0 | 6.5  |
| 592 | Control | 2018-12-31 | 59 | Female | 1.94 | 11.80 | 4.23  | 22.21 | No  | No  | No      | No      | 1347.6 | 9.4  |
| 593 | Control | 2018-12-31 | 54 | Female | 1.64 | 4.70  | 5.85  | 17.09 | No  | No  | Yes     | No      | 1638.3 | 5.4  |
| 594 | Control | 2018-12-31 | 56 | Female | 0.14 | 0.55  | 14.39 | 20.77 | No  | No  | Yes     | No      | 500.7  | 7.7  |
| 595 | Control | 2018-12-31 | 69 | Female | 0.91 | 0.26  | 6.92  | 19.56 | No  | No  | Yes     | No      | 1247.1 | 14.8 |
| 596 | Control | 2018-12-31 | 80 | Female | 1.84 | 0.31  | 20.70 | 22.97 | No  | No  | Yes     | No      | 1052.9 | 16.1 |
| 597 | Control | 2018-12-31 | 63 | Female | 0.56 | 1.01  | 1.70  | 25.39 | No  | No  | Yes     | No      | 258.0  | 4.2  |
| 598 | Control | 2018-12-31 | 77 | Female | 0.79 | 0.64  | 4.69  | 26.06 | No  | No  | Yes     | No      | 1450.9 | 4.1  |
| 599 | Control | 2018-12-31 | 75 | Female | 1.11 | 9.88  | 8.72  | 18.83 | No  | Yes | No      | No      | 816.5  | 6.7  |
| 600 | Control | 2018-12-31 | 61 | Female | 1.68 | 17.90 | 31.35 | 20.83 | No  | No  | Yes     | No      | 363.0  | 13.8 |
| 601 | Control | 2018-12-31 | 56 | Female | 2.87 | 8.30  | 5.55  | 24.41 | No  | No  | Yes     | No      | 1754.1 | 3.9  |
| 602 | Control | 2018-12-31 | 57 | Female | 1.04 | 6.10  | 2.00  | 25.71 | No  | No  | Yes     | No      | 635.5  | 6.5  |
| 603 | Control | 2018-12-31 | 68 | Female | 2.22 | 11.70 | 12.31 | 19.54 | Yes | No  | Yes     | No      | 1268.3 | 12.6 |
| 604 | Control | 2018-12-31 | 77 | Female | 2.23 | 4.40  | 12.81 | 28.31 | Yes | No  | Yes     | No      | 1051.0 | 4.9  |
| 605 | Control | 2018-12-31 | 77 | Female | 2.61 | 7.50  | 11.10 | 21.33 | No  | No  | Yes     | No      | 1506.1 | 14.1 |
| 606 | Control | 2018-12-31 | 71 | Female | 1.90 | 3.10  | 4.72  | 21.36 | No  | No  | Yes     | Yes     | 1383.9 | 4.8  |
| 607 | Control | 2018-12-31 | 61 | Female | 2.41 | 10.10 | 3.49  | 21.12 | No  | No  | Yes     | No      | 1139.9 | 10.2 |
| 608 | Control | 2018-12-31 | 62 | Female | 1.94 | 9.60  | 4.00  | 32.99 | No  | No  | Yes     | No      | 221.6  | 5.9  |

|     |         |            |    |        |      |       |       |       |     |     |         |         |        |      |
|-----|---------|------------|----|--------|------|-------|-------|-------|-----|-----|---------|---------|--------|------|
| 609 | Control | 2018-12-31 | 64 | Female | 1.61 | 10.90 | 6.36  | 24.43 | No  | No  | Yes     | No      | 871.3  | 3.3  |
| 610 | Control | 2018-12-31 | 71 | Female | 0.43 | 3.85  | 19.21 | 20.88 | No  | Yes | Yes     | No      | 501.5  | 2.7  |
| 611 | Control | 2018-12-31 | 79 | Female | 0.60 | 2.39  | 8.90  | 22.71 | No  | No  | Yes     | No      | 1276.8 | 7.2  |
| 612 | Control | 2018-12-31 | 54 | Female | 1.90 | 2.02  | 25.16 | 20.76 | No  | No  | Yes     | No      | 897.3  | 6.7  |
| 613 | Control | 2018-12-31 | 74 | Female | 1.36 | 0.25  | 7.51  | 20.15 | No  | No  | Yes     | No      | 598.3  | 16.7 |
| 614 | Control | 2018-12-31 | 56 | Female | 1.42 | 2.14  | 4.80  | 27.40 | No  | Yes | Yes     | No      | 312.6  | 8.2  |
| 615 | Control | 2018-12-31 | 64 | Male   | 1.42 | 1.80  | 28.36 | 17.10 | Yes | No  | No      | No      | 422.8  | 7.7  |
| 616 | Control | 2018-12-31 | 68 | Female | 1.41 | 4.40  | 11.71 | 22.48 | No  | No  | Yes     | No      | 1178.8 | 7.1  |
| 617 | Control | 2018-12-31 | 73 | Female | 3.34 | 5.20  | 3.76  | 23.56 | No  | No  | Yes     | No      | 1545.3 | 11.0 |
| 618 | Control | 2018-12-31 | 73 | Female | 4.62 | 16.30 | 25.29 | 15.06 | No  | No  | Yes     | No      | 1023.2 | 11.0 |
| 619 | Control | 2018-12-31 | 66 | Female | 2.34 | 4.70  | 3.80  | 25.21 | No  | No  | Yes     | No      | 553.5  | 6.3  |
| 620 | Control | 2018-12-31 | 55 | Female | 1.13 | 2.50  | 0.00  | 22.35 | No  | No  | Missing | Missing | 1195.8 | 13.7 |
| 621 | Control | 2018-12-31 | 62 | Male   | 1.86 | 15.50 | 5.32  | 24.64 | Yes | Yes | Yes     | No      | 1577.5 | 15.6 |
| 622 | Control | 2018-12-31 | 75 | Female | 0.24 | 4.21  | 13.69 | 28.76 | No  | No  | No      | No      | 1623.1 | 11.5 |
| 623 | Control | 2018-12-31 | 63 | Female | 0.36 | 0.09  | 18.07 | 19.44 | No  | No  | Yes     | No      | 253.7  | 7.5  |
| 624 | Control | 2018-12-31 | 58 | Male   | 0.56 | 4.84  | 17.79 | 25.71 | Yes | No  | Yes     | No      | 190.1  | 16.2 |
| 625 | Control | 2018-12-31 | 59 | Male   | 1.31 | 1.24  | 10.75 | 29.39 | No  | No  | Yes     | No      | 1353.3 | 9.1  |
| 626 | Control | 2018-12-31 | 62 | Female | 1.34 | 0.45  | 12.03 | 26.30 | No  | No  | Yes     | No      | 1307.9 | 1.5  |
| 627 | Control | 2018-12-31 | 78 | Female | 0.34 | 4.85  | 10.77 | 25.56 | No  | No  | Yes     | No      | 315.7  | 11.9 |
| 628 | Control | 2018-12-31 | 60 | Female | 0.20 | 0.92  | 5.26  | 27.57 | No  | No  | Yes     | No      | 231.9  | 5.5  |
| 629 | Control | 2018-12-31 | 76 | Female | 0.78 | 5.45  | 29.71 | 23.46 | No  | No  | Yes     | No      | 136.2  | 9.1  |
| 630 | Control | 2018-12-31 | 60 | Female | 0.60 | 1.23  | 9.04  | 24.97 | No  | No  | Yes     | No      | 1768.6 | 6.0  |
| 631 | Control | 2018-12-31 | 53 | Female | 2.49 | 11.44 | 34.81 | 28.03 | No  | No  | Yes     | No      | 1570.3 | 12.4 |
| 632 | Control | 2018-12-31 | 56 | Female | 1.02 | 0.05  | 25.45 | 24.44 | No  | No  | Yes     | No      | 1127.7 | 10.9 |
| 633 | Control | 2018-12-31 | 54 | Female | 0.43 | 3.25  | 9.42  | 24.91 | No  | Yes | Missing | Missing | 2109.5 | 7.1  |
| 634 | Control | 2018-12-31 | 62 | Male   | 0.94 | 11.30 | 3.35  | 29.18 | Yes | Yes | No      | No      | 244.2  | 9.1  |
| 635 | Control | 2018-12-31 | 78 | Female | 1.45 | 11.30 | 7.34  | 22.43 | No  | No  | No      | No      | 203.4  | 14.4 |
| 636 | Control | 2018-12-31 | 67 | Female | 2.04 | 13.50 | 9.50  | 33.82 | No  | No  | Yes     | No      | 305.9  | 0.5  |

|     |         |            |    |        |      |       |       |         |     |     |         |         |        |      |
|-----|---------|------------|----|--------|------|-------|-------|---------|-----|-----|---------|---------|--------|------|
| 637 | Control | 2018-12-31 | 56 | Female | 2.24 | 15.70 | 20.91 | 25.52   | No  | Yes | No      | No      | 838.9  | 3.7  |
| 638 | Control | 2018-12-31 | 84 | Female | 3.24 | 13.10 | 13.51 | 15.81   | Yes | No  | Yes     | No      | 503.2  | 14.4 |
| 639 | Control | 2018-12-31 | 76 | Female | 0.84 | 10.40 | 5.21  | 24.68   | No  | No  | Yes     | No      | 451.2  | 6.2  |
| 640 | Control | 2018-12-31 | 61 | Female | 0.73 | 12.30 | 3.37  | 19.90   | No  | No  | No      | Yes     | 1465.8 | 7.2  |
| 641 | Control | 2018-12-31 | 60 | Female | 3.33 | 2.13  | 14.01 | 26.02   | No  | No  | Yes     | No      | 2172.2 | 4.1  |
| 642 | Control | 2018-12-31 | 54 | Female | 0.53 | 4.04  | 3.07  | 20.28   | No  | No  | Missing | Missing | 826.6  | 4.0  |
| 643 | Control | 2018-12-31 | 70 | Female | 1.65 | 12.80 | 10.88 | 27.39   | No  | No  | Yes     | No      | 1511.8 | 6.7  |
| 644 | Control | 2018-12-31 | 65 | Female | 2.28 | 1.86  | 5.45  | Missing | Yes | Yes | Yes     | No      | 1551.0 | 10.7 |
| 645 | Control | 2018-12-31 | 62 | Female | 0.39 | 1.59  | 24.55 | 22.87   | No  | No  | Yes     | No      | 1252.1 | 6.0  |
| 646 | Control | 2018-12-31 | 81 | Male   | 3.58 | 7.10  | 23.73 | 26.62   | No  | No  | Yes     | No      | 1590.5 | 15.5 |
| 647 | Control | 2018-12-31 | 51 | Female | 1.11 | 5.40  | 4.38  | 24.32   | No  | No  | Yes     | No      | 1206.8 | 6.3  |
| 648 | Control | 2018-12-31 | 76 | Female | 3.76 | 5.67  | 21.25 | 23.42   | No  | No  | Missing | Missing | 2648.8 | 10.4 |
| 649 | Control | 2018-12-31 | 73 | Female | 2.72 | 11.00 | 7.21  | 24.65   | No  | No  | Yes     | No      | 1459.8 | 18.2 |
| 650 | Control | 2018-12-31 | 64 | Female | 2.91 | 5.90  | 6.06  | 24.65   | No  | No  | Yes     | No      | 1350.9 | 7.4  |
| 651 | Control | 2018-12-31 | 77 | Female | 1.99 | 12.20 | 3.22  | 23.92   | No  | No  | Yes     | No      | 1290.5 | 5.8  |
| 652 | Control | 2018-12-31 | 70 | Female | 0.73 | 5.20  | 5.96  | 23.04   | No  | No  | Yes     | No      | 624.8  | 7.2  |
| 653 | Control | 2018-12-31 | 76 | Female | 2.06 | 6.50  | 6.42  | 27.99   | No  | No  | Yes     | No      | 1561.9 | 10.5 |
| 654 | Control | 2018-12-31 | 71 | Female | 0.59 | 7.50  | 5.96  | 20.17   | No  | Yes | Yes     | No      | 1195.4 | 14.6 |
| 655 | Control | 2018-12-31 | 58 | Female | 4.45 | 7.60  | 8.80  | 29.68   | No  | No  | No      | No      | 683.2  | 9.5  |
| 656 | Control | 2018-12-31 | 78 | Male   | 1.76 | 10.50 | 6.43  | 27.79   | Yes | Yes | Yes     | No      | 1095.3 | 7.2  |
| 657 | Control | 2018-12-31 | 72 | Male   | 1.89 | 9.90  | 12.83 | 27.43   | Yes | No  | No      | No      | 985.2  | 14.4 |
| 658 | Control | 2018-12-31 | 69 | Female | 2.99 | 11.50 | 8.41  | 26.75   | Yes | No  | Yes     | No      | 944.6  | 4.1  |
| 659 | Control | 2018-12-31 | 54 | Female | 1.04 | 3.81  | 2.94  | 25.33   | No  | No  | Missing | Missing | 2272.1 | 11.8 |
| 660 | Control | 2018-12-31 | 57 | Female | 0.30 | 2.11  | 1.15  | 19.95   | No  | No  | No      | No      | 130.5  | 9.5  |
| 661 | Control | 2018-12-31 | 59 | Female | 0.72 | 0.43  | 8.48  | 22.94   | No  | No  | Yes     | Missing | 1373.7 | 8.1  |
| 662 | Control | 2018-12-31 | 65 | Male   | 3.86 | 2.19  | 0.01  | 17.25   | Yes | Yes | Yes     | No      | 1277.7 | 5.8  |
| 663 | Control | 2018-12-31 | 71 | Female | 3.28 | 0.28  | 0.01  | 34.81   | No  | No  | Yes     | No      | 1193.2 | 9.5  |
| 664 | Control | 2018-12-31 | 73 | Male   | 3.13 | 2.55  | 20.34 | 17.98   | No  | No  | Yes     | No      | 470.4  | 15.3 |

|     |         |            |    |        |      |       |       |         |     |     |         |         |        |      |
|-----|---------|------------|----|--------|------|-------|-------|---------|-----|-----|---------|---------|--------|------|
| 665 | Control | 2018-12-31 | 58 | Female | 1.74 | 12.94 | 6.33  | 28.73   | No  | No  | Yes     | No      | 1295.4 | 6.0  |
| 666 | Control | 2018-12-31 | 76 | Female | 0.42 | 2.91  | 3.35  | 25.99   | No  | No  | Missing | Missing | 1504.9 | 6.1  |
| 667 | Control | 2018-12-31 | 63 | Female | 1.13 | 4.10  | 0.00  | 19.57   | No  | No  | Missing | Missing | 1228.6 | 1.8  |
| 668 | Control | 2018-12-31 | 71 | Female | 4.07 | 13.20 | 17.08 | 22.21   | No  | No  | Yes     | No      | 1294.3 | 16.0 |
| 669 | Control | 2018-12-31 | 71 | Female | 4.12 | 6.80  | 9.52  | 21.78   | No  | No  | Yes     | No      | 803.3  | 9.3  |
| 670 | Control | 2018-12-31 | 59 | Female | 1.31 | 9.20  | 4.22  | 20.20   | No  | No  | Yes     | No      | 1620.5 | 4.9  |
| 671 | Control | 2018-12-31 | 67 | Female | 0.31 | 0.28  | 6.35  | 28.15   | No  | No  | Yes     | No      | 262.4  | 3.9  |
| 672 | Control | 2018-12-31 | 57 | Female | 0.75 | 1.90  | 21.58 | 28.15   | No  | No  | Yes     | No      | 513.8  | 13.7 |
| 673 | Control | 2018-12-31 | 60 | Female | 2.12 | 3.38  | 24.62 | 27.22   | No  | No  | Yes     | No      | 358.2  | 16.6 |
| 674 | Control | 2018-12-31 | 62 | Female | 0.86 | 1.50  | 13.52 | 25.15   | No  | No  | No      | No      | 467.2  | 5.8  |
| 675 | Control | 2018-12-31 | 77 | Female | 3.21 | 11.10 | 18.84 | 22.89   | No  | No  | Yes     | No      | 1666.6 | 4.1  |
| 676 | Control | 2018-12-31 | 69 | Female | 0.86 | 4.80  | 5.65  | 29.90   | No  | No  | Yes     | No      | 438.2  | 6.6  |
| 677 | Control | 2018-12-31 | 58 | Female | 1.86 | 8.10  | 16.79 | 25.45   | No  | No  | Yes     | No      | 1100.4 | 8.8  |
| 678 | Control | 2018-12-31 | 63 | Female | 1.53 | 10.30 | 8.07  | 24.80   | No  | No  | Yes     | No      | 1208.8 | 12.9 |
| 679 | Control | 2018-12-31 | 60 | Female | 1.06 | 15.60 | 7.06  | 20.72   | No  | No  | Yes     | No      | 1097.5 | 10.1 |
| 680 | Control | 2018-12-31 | 63 | Female | 1.54 | 14.70 | 5.22  | 24.30   | No  | No  | Yes     | No      | 321.9  | 6.6  |
| 681 | Control | 2018-12-31 | 61 | Female | 1.31 | 8.60  | 5.51  | 25.20   | No  | No  | Yes     | No      | 328.6  | 6.6  |
| 682 | Control | 2018-12-31 | 62 | Female | 1.80 | 9.30  | 3.56  | 24.42   | No  | No  | Yes     | No      | 595.2  | 8.4  |
| 683 | Control | 2018-12-31 | 57 | Female | 2.36 | 9.60  | 10.56 | 24.45   | No  | No  | Yes     | No      | 848.5  | 4.0  |
| 684 | Control | 2018-12-31 | 68 | Female | 3.19 | 8.70  | 17.12 | 25.07   | Yes | No  | Yes     | No      | 876.0  | 4.2  |
| 685 | Control | 2018-12-31 | 72 | Male   | 1.17 | 12.00 | 9.26  | 22.04   | Yes | Yes | Yes     | No      | 853.8  | 6.7  |
| 686 | Control | 2018-12-31 | 72 | Male   | 2.10 | 6.80  | 4.06  | 25.78   | No  | No  | Yes     | No      | 941.3  | 9.0  |
| 687 | Control | 2018-12-31 | 72 | Male   | 0.76 | 3.90  | 2.00  | 23.55   | Yes | Yes | Yes     | No      | 1310.8 | 12.2 |
| 688 | Control | 2018-12-31 | 65 | Male   | 0.94 | 11.80 | 6.25  | 24.34   | Yes | Yes | Yes     | No      | 1902.7 | 14.4 |
| 689 | Control | 2018-12-31 | 62 | Male   | 1.87 | 15.10 | 2.00  | Missing | Yes | Yes | Yes     | No      | 256.3  | 6.6  |
| 690 | Control | 2018-12-31 | 61 | Male   | 1.62 | 8.50  | 6.22  | 23.73   | Yes | Yes | Yes     | No      | 270.7  | 8.7  |
| 691 | Control | 2018-12-31 | 63 | Male   | 1.17 | 3.64  | 2.48  | 18.83   | No  | No  | Missing | Missing | 1450.7 | 6.6  |
| 692 | Control | 2018-12-31 | 63 | Male   | 1.65 | 11.00 | 7.93  | 23.51   | Yes | Yes | Yes     | No      | 1231.3 | 9.1  |

|     |         |            |    |        |      |       |       |       |     |     |         |         |        |      |
|-----|---------|------------|----|--------|------|-------|-------|-------|-----|-----|---------|---------|--------|------|
| 693 | Control | 2018-12-31 | 62 | Male   | 4.19 | 4.30  | 26.96 | 21.79 | No  | No  | Yes     | No      | 205.8  | 8.9  |
| 694 | Control | 2018-12-31 | 67 | Male   | 4.45 | 7.20  | 9.79  | 21.63 | Yes | No  | Yes     | No      | 954.3  | 1.1  |
| 695 | Control | 2018-12-31 | 53 | Female | 2.03 | 4.37  | 0.00  | 22.93 | No  | Yes | Missing | Missing | 3282.2 | 3.5  |
| 696 | Control | 2018-12-31 | 65 | Male   | 2.27 | 18.60 | 8.31  | 30.00 | Yes | Yes | Yes     | Yes     | 745.4  | 6.8  |
| 697 | Control | 2018-12-31 | 66 | Female | 0.25 | 0.40  | 12.41 | 19.43 | No  | No  | Yes     | No      | 1523.5 | 6.6  |
| 698 | Control | 2018-12-31 | 64 | Male   | 3.92 | 6.85  | 1.21  | 25.01 | Yes | Yes | Yes     | No      | 1243.9 | 4.6  |
| 699 | Control | 2018-12-31 | 63 | Male   | 1.89 | 0.56  | 8.77  | 22.31 | Yes | Yes | Yes     | No      | 1524.2 | 13.9 |
| 700 | Control | 2018-12-31 | 64 | Male   | 1.45 | 2.11  | 2.78  | 23.51 | Yes | Yes | Missing | Missing | 3552.5 | 4.0  |
| 701 | Control | 2018-12-31 | 75 | Male   | 2.18 | 2.94  | 27.64 | 23.74 | Yes | Yes | No      | No      | 1460.6 | 15.4 |
| 702 | Control | 2018-12-31 | 61 | Male   | 2.42 | 1.38  | 18.45 | 26.04 | No  | No  | Yes     | No      | 1749.6 | 6.4  |
| 703 | Control | 2018-12-31 | 60 | Male   | 1.06 | 4.58  | 0.00  | 22.76 | Yes | Yes | Missing | Missing | 1451.8 | 1.5  |
| 704 | Control | 2018-12-31 | 64 | Female | 0.84 | 3.35  | 0.00  | 22.66 | No  | No  | Missing | Missing | 3014.4 | 8.0  |
| 705 | Control | 2018-12-31 | 68 | Male   | 1.15 | 3.50  | 16.64 | 25.51 | Yes | Yes | Yes     | No      | 1316.9 | 6.6  |
| 706 | Control | 2018-12-31 | 63 | Male   | 1.63 | 0.04  | 3.92  | 24.11 | No  | Yes | No      | No      | 819.0  | 4.0  |
| 707 | Control | 2018-12-31 | 61 | Female | 1.72 | 2.89  | 31.51 | 22.98 | No  | No  | Yes     | No      | 787.0  | 6.7  |
| 708 | Control | 2018-12-31 | 58 | Female | 1.07 | 1.97  | 21.16 | 22.07 | No  | No  | Yes     | No      | 1699.4 | 17.6 |
| 709 | Control | 2018-12-31 | 59 | Male   | 1.62 | 1.33  | 15.51 | 24.01 | No  | No  | Yes     | No      | 1399.0 | 2.8  |
| 710 | Control | 2018-12-31 | 68 | Male   | 1.10 | 0.40  | 22.70 | 24.62 | No  | No  | Yes     | No      | 1201.6 | 9.4  |
| 711 | Control | 2018-12-31 | 80 | Male   | 1.15 | 1.14  | 19.88 | 24.98 | Yes | No  | Yes     | No      | 1466.1 | 4.6  |
| 712 | Control | 2018-12-31 | 67 | Male   | 0.69 | 0.00  | 3.12  | 29.05 | No  | No  | No      | No      | 165.5  | 1.9  |
| 713 | Control | 2018-12-31 | 59 | Male   | 1.81 | 1.61  | 22.44 | 24.86 | No  | No  | No      | No      | 1120.9 | 6.8  |
| 714 | Control | 2018-12-31 | 67 | Male   | 3.96 | 22.00 | 16.86 | 26.57 | Yes | No  | Yes     | No      | 1557.4 | 6.9  |
| 715 | Control | 2018-12-31 | 60 | Female | 0.48 | 2.39  | 5.33  | 26.69 | No  | No  | Missing | No      | 1332.0 | 6.7  |
| 716 | Control | 2018-12-31 | 62 | Male   | 0.67 | 5.03  | 4.16  | 25.56 | Yes | No  | Missing | Missing | 2451.8 | 10.2 |
| 717 | Control | 2018-12-31 | 64 | Male   | 2.18 | 13.50 | 6.67  | 23.99 | Yes | No  | Yes     | No      | 1566.9 | 6.7  |
| 718 | Control | 2018-12-31 | 69 | Female | 2.90 | 9.30  | 2.00  | 26.69 | No  | No  | Yes     | No      | 1287.1 | 10.4 |
| 719 | Control | 2018-12-31 | 68 | Male   | 4.33 | 16.70 | 16.46 | 29.02 | No  | No  | Yes     | No      | 360.0  | 2.8  |
| 720 | Control | 2018-12-31 | 66 | Male   | 4.30 | 7.80  | 2.00  | 30.48 | No  | No  | Yes     | No      | 1729.9 | 13.1 |

|     |         |            |    |        |      |       |       |       |     |     |         |         |        |      |
|-----|---------|------------|----|--------|------|-------|-------|-------|-----|-----|---------|---------|--------|------|
| 721 | Control | 2018-12-31 | 73 | Male   | 3.18 | 10.50 | 9.89  | 27.00 | No  | No  | Yes     | No      | 1527.0 | 2.3  |
| 722 | Control | 2018-12-31 | 78 | Male   | 2.87 | 5.00  | 6.51  | 23.47 | Yes | Yes | Yes     | No      | 1879.1 | 10.4 |
| 723 | Control | 2018-12-31 | 70 | Male   | 1.31 | 8.00  | 6.85  | 31.28 | Yes | No  | Yes     | No      | 47.7   | 7.8  |
| 724 | Control | 2018-12-31 | 75 | Male   | 2.50 | 7.30  | 10.00 | 21.49 | No  | No  | Yes     | No      | 1960.5 | 8.2  |
| 725 | Control | 2018-12-31 | 59 | Male   | 1.49 | 8.20  | 4.38  | 27.86 | Yes | Yes | Yes     | No      | 1662.3 | 7.4  |
| 726 | Control | 2018-12-31 | 68 | Male   | 3.94 | 10.10 | 5.64  | 26.79 | Yes | No  | Yes     | No      | 1300.0 | 3.4  |
| 727 | Control | 2018-12-31 | 62 | Female | 2.24 | 4.10  | 2.00  | 30.44 | No  | No  | Yes     | No      | 476.3  | 5.3  |
| 728 | Control | 2018-12-31 | 66 | Male   | 1.59 | 6.40  | 7.31  | 20.94 | Yes | Yes | No      | No      | 304.6  | 10.8 |
| 729 | Control | 2018-12-31 | 69 | Female | 3.51 | 16.30 | 18.33 | 24.00 | Yes | No  | Yes     | No      | 402.4  | 1.3  |
| 730 | Control | 2018-12-31 | 68 | Male   | 3.37 | 9.30  | 2.00  | 22.55 | Yes | Yes | Yes     | No      | 532.6  | 7.4  |
| 731 | Control | 2018-12-31 | 66 | Male   | 1.23 | 8.98  | 4.76  | 24.61 | Yes | Yes | Yes     | No      | 650.8  | 11.0 |
| 732 | Control | 2018-12-31 | 63 | Female | 2.21 | 10.20 | 9.57  | 23.73 | No  | No  | Yes     | No      | 394.7  | 6.2  |
| 733 | Control | 2018-12-31 | 59 | Male   | 1.67 | 11.20 | 6.06  | 26.85 | No  | Yes | No      | No      | 599.4  | 9.0  |
| 734 | Control | 2018-12-31 | 66 | Female | 1.33 | 11.13 | 34.62 | 22.81 | No  | No  | No      | No      | 1451.4 | 13.4 |
| 735 | Control | 2018-12-31 | 61 | Male   | 2.66 | 5.40  | 5.97  | 23.77 | Yes | No  | Yes     | No      | 336.7  | 4.6  |
| 736 | Control | 2018-12-31 | 65 | Male   | 1.99 | 12.10 | 11.21 | 29.21 | Yes | Yes | Yes     | No      | 302.3  | 8.4  |
| 737 | Control | 2018-12-31 | 67 | Male   | 1.56 | 2.79  | 29.53 | 18.36 | Yes | Yes | Yes     | No      | 1210.3 | 9.0  |
| 738 | Control | 2018-12-31 | 57 | Male   | 1.26 | 2.31  | 5.89  | 25.69 | No  | No  | Yes     | No      | 1660.3 | 9.3  |
| 739 | Control | 2018-12-31 | 51 | Male   | 2.62 | 10.10 | 2.72  | 19.25 | Yes | Yes | No      | No      | 379.0  | 8.3  |
| 740 | Control | 2018-12-31 | 77 | Male   | 2.75 | 6.70  | 17.74 | 17.21 | Yes | No  | Yes     | No      | 320.6  | 11.9 |
| 741 | Control | 2018-12-31 | 67 | Male   | 4.28 | 0.01  | 12.93 | 24.28 | Yes | No  | Yes     | No      | 810.0  | 6.4  |
| 742 | Control | 2018-12-31 | 71 | Male   | 2.07 | 5.46  | 0.00  | 28.23 | Yes | Yes | Missing | Missing | 2754.8 | 7.8  |
| 743 | Control | 2018-12-31 | 61 | Male   | 3.03 | 8.80  | 11.32 | 17.75 | No  | No  | Yes     | No      | 299.3  | 13.2 |
| 744 | Control | 2018-12-31 | 65 | Male   | 4.92 | 9.70  | 4.23  | 18.11 | Yes | Yes | Yes     | No      | 289.2  | 6.1  |
| 745 | Control | 2018-12-31 | 62 | Female | 2.74 | 11.80 | 2.00  | 20.18 | No  | No  | Yes     | No      | 352.4  | 2.5  |
| 746 | Control | 2018-12-31 | 80 | Male   | 2.54 | 6.70  | 2.00  | 23.60 | Yes | Yes | Yes     | No      | 730.1  | 12.7 |
| 747 | Control | 2018-12-31 | 76 | Male   | 3.56 | 16.30 | 13.18 | 19.96 | No  | Yes | Yes     | No      | 371.5  | 1.4  |
| 748 | Control | 2018-12-31 | 72 | Male   | 4.48 | 5.80  | 3.90  | 22.99 | Yes | Yes | Yes     | No      | 1520.6 | 9.0  |



|     |         |            |    |        |      |       |       |         |     |     |         |         |        |      |
|-----|---------|------------|----|--------|------|-------|-------|---------|-----|-----|---------|---------|--------|------|
| 749 | Control | 2018-12-31 | 63 | Male   | 1.06 | 1.96  | 12.16 | 24.28   | No  | Yes | Missing | No      | 535.1  | 2.3  |
| 750 | Control | 2018-12-31 | 77 | Female | 2.69 | 4.77  | 13.67 | 16.17   | No  | No  | Missing | Missing | 3037.9 | 6.3  |
| 751 | Control | 2018-12-31 | 77 | Female | 1.15 | 4.41  | 0.00  | Missing | No  | No  | Missing | Missing | 3665.7 | 9.7  |
| 752 | Control | 2018-12-31 | 68 | Female | 0.77 | 2.69  | 0.00  | 23.50   | No  | No  | Missing | Missing | 1337.0 | 7.4  |
| 753 | Control | 2018-12-31 | 71 | Female | 2.07 | 8.30  | 24.03 | 19.53   | No  | No  | Yes     | No      | 502.0  | 12.0 |
| 754 | Control | 2018-12-31 | 61 | Female | 0.88 | 2.04  | 5.75  | 19.22   | No  | No  | Missing | Missing | 1198.2 | 10.2 |
| 755 | Control | 2018-12-31 | 72 | Female | 0.48 | 2.26  | 2.61  | 19.47   | No  | No  | Missing | Missing | 2694.8 | 3.8  |
| 756 | Control | 2018-12-31 | 76 | Female | 1.88 | 5.70  | 21.89 | 29.41   | No  | No  | Yes     | Yes     | 1286.0 | 2.3  |
| 757 | Control | 2018-12-31 | 74 | Male   | 1.97 | 8.10  | 8.42  | 21.26   | No  | Yes | Yes     | No      | 1325.9 | 10.1 |
| 758 | Control | 2018-12-31 | 70 | Male   | 4.56 | 6.90  | 11.73 | 22.22   | Yes | No  | Yes     | No      | 1116.5 | 6.0  |
| 759 | Control | 2018-12-31 | 70 | Male   | 1.97 | 5.70  | 8.56  | 23.04   | Yes | Yes | Yes     | No      | 876.6  | 10.0 |
| 760 | Control | 2018-12-31 | 72 | Male   | 1.82 | 12.30 | 7.37  | 23.40   | Yes | Yes | Yes     | No      | 1231.2 | 4.8  |
| 761 | Control | 2018-12-31 | 70 | Male   | 2.63 | 18.30 | 12.30 | 27.23   | Yes | Yes | Yes     | No      | 1485.5 | 6.8  |
| 762 | Control | 2018-12-31 | 82 | Male   | 3.34 | 6.20  | 8.22  | 25.44   | Yes | No  | Yes     | No      | 1302.4 | 11.9 |
| 763 | Control | 2018-12-31 | 69 | Male   | 2.15 | 7.30  | 4.29  | 23.98   | No  | No  | Yes     | No      | 1185.2 | 10.0 |
| 764 | Control | 2018-12-31 | 66 | Male   | 1.14 | 7.80  | 4.35  | 21.89   | No  | No  | Yes     | No      | 1197.2 | 11.3 |
| 765 | Control | 2018-12-31 | 53 | Female | 3.66 | 5.40  | 5.98  | 24.65   | No  | No  | Yes     | No      | 1510.6 | 9.9  |
| 766 | Control | 2018-12-31 | 63 | Male   | 3.64 | 6.50  | 2.25  | 24.92   | Yes | Yes | Yes     | No      | 767.5  | 6.1  |
| 767 | Control | 2018-12-31 | 62 | Male   | 1.55 | 6.72  | 6.07  | 19.77   | Yes | No  | Missing | Missing | 3458.3 | 6.4  |
| 768 | Control | 2018-12-31 | 68 | Female | 1.49 | 12.10 | 4.72  | 25.60   | No  | No  | Yes     | Missing | 1873.0 | 7.3  |
| 769 | Control | 2018-12-31 | 61 | Male   | 2.04 | 12.50 | 6.10  | 25.14   | No  | No  | Yes     | No      | 655.3  | 0.6  |
| 770 | Control | 2018-12-31 | 57 | Female | 1.52 | 7.40  | 2.00  | 22.72   | No  | No  | Yes     | Missing | 1722.4 | 4.9  |
| 771 | Control | 2018-12-31 | 55 | Female | 1.24 | 11.10 | 11.43 | 21.72   | No  | No  | Yes     | No      | 907.9  | 3.0  |
| 772 | Control | 2018-12-31 | 61 | Male   | 3.04 | 18.60 | 2.00  | 14.61   | No  | No  | Yes     | No      | 1121.5 | 7.9  |
| 773 | Control | 2018-12-31 | 74 | Male   | 0.97 | 10.30 | 2.00  | 29.78   | Yes | No  | Yes     | No      | 451.1  | 7.0  |
| 774 | Control | 2018-12-31 | 68 | Female | 1.33 | 3.90  | 10.93 | 20.27   | No  | No  | Missing | Missing | 3245.6 | 2.3  |
| 775 | Control | 2018-12-31 | 65 | Male   | 0.67 | 2.84  | 6.8   | 29.71   | No  | No  | Missing | Missing | 1775.0 | 2.2  |
| 776 | Control | 2018-12-31 | 80 | Male   | 4.13 | 3.02  | 15.75 | 19.83   | Yes | No  | Yes     | No      | 1121.8 | 5.0  |

|     |         |            |    |        |      |       |       |       |     |     |         |         |        |      |
|-----|---------|------------|----|--------|------|-------|-------|-------|-----|-----|---------|---------|--------|------|
| 777 | Control | 2018-12-31 | 71 | Male   | 0.70 | 4.98  | 0.01  | 23.59 | Yes | Yes | Yes     | No      | 1209.2 | 12.5 |
| 778 | Control | 2018-12-31 | 75 | Female | 1.41 | 23.42 | 26.90 | 21.48 | No  | No  | Yes     | No      | 1741.2 | 11.9 |
| 779 | Control | 2018-12-31 | 63 | Female | 1.76 | 4.33  | 7.16  | 28.62 | No  | No  | Missing | Missing | 2600.7 | 3.6  |
| 780 | Control | 2018-12-31 | 70 | Female | 0.59 | 6.27  | 26.60 | 21.57 | No  | No  | Yes     | No      | 1706.8 | 3.5  |
| 781 | Control | 2018-12-31 | 70 | Female | 0.44 | 1.15  | 4.22  | 23.94 | No  | No  | Yes     | No      | 1448.2 | 17.9 |
| 782 | Control | 2018-12-31 | 56 | Female | 3.14 | 1.04  | 2.98  | 27.85 | No  | No  | Yes     | No      | 1394.2 | 4.4  |
| 783 | Control | 2018-12-31 | 60 | Male   | 3.32 | 0.32  | 6.47  | 27.14 | No  | No  | Yes     | No      | 1455.9 | 6.7  |
| 784 | Control | 2018-12-31 | 71 | Female | 2.30 | 17.00 | 33.22 | 22.03 | No  | No  | No      | No      | 293.8  | 13.9 |
| 785 | Control | 2018-12-31 | 64 | Male   | 2.46 | 22.40 | 17.16 | 21.45 | Yes | No  | No      | No      | 352.6  | 7.0  |
| 786 | Control | 2018-12-31 | 72 | Female | 0.62 | 1.66  | 2.55  | 21.99 | No  | No  | Missing | Missing | 1420.8 | 2.9  |
| 787 | Control | 2018-12-31 | 70 | Male   | 1.99 | 11.50 | 2.00  | 24.14 | No  | Yes | Yes     | No      | 358.0  | 12.4 |
| 788 | Control | 2018-12-31 | 75 | Male   | 4.15 | 19.50 | 30.10 | 27.68 | Yes | No  | Yes     | No      | 421.6  | 2.7  |
| 789 | Control | 2018-12-31 | 66 | Male   | 3.58 | 5.70  | 28.92 | 18.65 | Yes | Yes | Yes     | No      | 529.7  | 3.6  |
| 790 | Control | 2018-12-31 | 75 | Female | 1.59 | 6.60  | 16.14 | 23.67 | No  | No  | Yes     | No      | 319.8  | 1.4  |
| 791 | Control | 2018-12-31 | 55 | Male   | 1.13 | 13.30 | 6.86  | 23.60 | No  | No  | Yes     | No      | 1827.9 | 13.0 |
| 792 | Control | 2018-12-31 | 67 | Male   | 2.94 | 2.16  | 15.76 | 28.47 | Yes | No  | Yes     | No      | 1589.7 | 3.9  |
| 793 | Control | 2018-12-31 | 73 | Male   | 0.01 | 3.65  | 10.96 | 24.80 | No  | Yes | Yes     | No      | 1147.7 | 9.3  |
| 794 | Control | 2018-12-31 | 73 | Male   | 2.71 | 0.04  | 18.11 | 27.21 | No  | No  | No      | No      | 1193.8 | 12.8 |
| 795 | Control | 2018-12-31 | 79 | Male   | 3.20 | 2.12  | 18.93 | 19.06 | Yes | Yes | Yes     | No      | 1500.6 | 6.0  |
| 796 | Control | 2018-12-31 | 75 | Male   | 5.59 | 21.70 | 17.37 | 29.66 | Yes | Yes | Yes     | No      | 1185.6 | 7.2  |
| 797 | Control | 2018-12-31 | 73 | Male   | 0.15 | 0.01  | 0.95  | 21.46 | Yes | No  | Yes     | No      | 1594.2 | 9.3  |
| 798 | Control | 2018-12-31 | 53 | Female | 2.00 | 5.71  | 0.00  | 19.14 | Yes | No  | Missing | Missing | 1364.5 | 5.5  |
| 799 | Control | 2018-12-31 | 61 | Male   | 0.64 | 2.21  | 5.54  | 21.31 | No  | No  | Missing | No      | 526.9  | 8.1  |
| 800 | Control | 2018-12-31 | 68 | Female | 0.67 | 0.01  | 3.01  | 21.57 | No  | No  | Yes     | No      | 778.4  | 3.8  |
| 801 | Control | 2018-12-31 | 71 | Male   | 0.84 | 2.00  | 0.00  | 22.46 | Yes | Yes | Missing | Missing | 2937.5 | 14.8 |
| 802 | Control | 2018-12-31 | 56 | Female | 1.64 | 14.40 | 9.98  | 24.09 | No  | No  | Yes     | No      | 1308.7 | 9.8  |
| 803 | Control | 2018-12-31 | 62 | Male   | 2.10 | 10.70 | 7.12  | 28.38 | Yes | Yes | Yes     | No      | 1211.4 | 6.7  |
| 804 | Control | 2018-12-31 | 65 | Male   | 1.67 | 7.60  | 6.25  | 25.86 | Yes | No  | Yes     | No      | 1697.3 | 9.2  |

|     |         |            |    |        |      |       |       |       |     |     |         |         |        |      |
|-----|---------|------------|----|--------|------|-------|-------|-------|-----|-----|---------|---------|--------|------|
| 805 | Control | 2018-12-31 | 65 | Male   | 3.11 | 13.80 | 6.15  | 20.50 | No  | Yes | No      | No      | 1058.7 | 2.4  |
| 806 | Control | 2018-12-31 | 71 | Female | 1.54 | 7.70  | 3.99  | 23.34 | No  | No  | Yes     | No      | 1174.5 | 5.7  |
| 807 | Control | 2018-12-31 | 64 | Male   | 3.39 | 4.20  | 5.03  | 25.07 | Yes | Yes | Yes     | No      | 1439.6 | 6.1  |
| 808 | Control | 2018-12-31 | 66 | Female | 1.37 | 8.70  | 2.00  | 21.64 | No  | No  | Yes     | No      | 1345.9 | 5.0  |
| 809 | Control | 2018-12-31 | 60 | Female | 0.52 | 3.55  | 0.00  | 23.63 | No  | No  | Missing | Missing | 1312.5 | 9.7  |
| 810 | Control | 2018-12-31 | 62 | Male   | 2.54 | 8.20  | 10.50 | 19.30 | No  | No  | Yes     | No      | 920.1  | 7.5  |
| 811 | Control | 2018-12-31 | 61 | Male   | 2.10 | 6.90  | 15.20 | 29.06 | No  | No  | Yes     | No      | 1152.1 | 9.0  |
| 812 | Control | 2018-12-31 | 54 | Female | 1.92 | 14.00 | 3.05  | 19.43 | No  | No  | Yes     | No      | 1168.8 | 5.5  |
| 813 | Control | 2018-12-31 | 74 | Male   | 3.87 | 7.80  | 25.86 | 22.44 | Yes | No  | Yes     | No      | 1114.9 | 8.2  |
| 814 | Control | 2018-12-31 | 68 | Female | 1.65 | 6.70  | 5.90  | 20.13 | No  | No  | Yes     | No      | 1237.3 | 4.4  |
| 815 | Control | 2018-12-31 | 61 | Female | 0.69 | 11.00 | 6.34  | 27.68 | No  | No  | Yes     | Yes     | 1061.1 | 15.9 |
| 816 | Control | 2018-12-31 | 59 | Female | 2.35 | 4.00  | 19.69 | 19.43 | No  | No  | Yes     | No      | 1257.5 | 7.1  |
| 817 | Control | 2018-12-31 | 61 | Male   | 1.97 | 7.20  | 4.25  | 24.75 | Yes | Yes | No      | No      | 1834.3 | 6.6  |
| 818 | Control | 2018-12-31 | 62 | Male   | 2.21 | 4.90  | 5.39  | 18.78 | Yes | Yes | Yes     | No      | 735.1  | 5.5  |
| 819 | Control | 2018-12-31 | 65 | Female | 1.48 | 11.30 | 29.52 | 22.23 | No  | Yes | Yes     | No      | 1726.4 | 14.0 |
| 820 | Control | 2018-12-31 | 65 | Female | 1.74 | 1.92  | 2.23  | 18.86 | No  | No  | Yes     | No      | 1201.3 | 2.8  |
| 821 | Control | 2018-12-31 | 65 | Male   | 2.56 | 9.60  | 7.09  | 17.20 | No  | Yes | Yes     | No      | 1113.6 | 0.7  |
| 822 | Control | 2018-12-31 | 68 | Male   | 4.00 | 10.40 | 2.00  | 22.37 | Yes | No  | Yes     | No      | 1442.5 | 5.2  |
| 823 | Control | 2018-12-31 | 65 | Male   | 1.56 | 7.70  | 7.45  | 25.10 | Yes | Yes | No      | No      | 2094.1 | 9.1  |
| 824 | Control | 2018-12-31 | 75 | Male   | 1.36 | 0.11  | 11.14 | 23.15 | Yes | Yes | Yes     | No      | 211.0  | 11.5 |
| 825 | Control | 2018-12-31 | 75 | Male   | 0.19 | 0.66  | 2.51  | 26.93 | No  | Yes | Yes     | No      | 1274.3 | 5.6  |
| 826 | Control | 2018-12-31 | 70 | Male   | 1.86 | 0.48  | 7.14  | 24.16 | Yes | Yes | Yes     | Missing | 1749.5 | 12.3 |
| 827 | Control | 2018-12-31 | 65 | Male   | 0.50 | 1.64  | 5.66  | 25.32 | Yes | No  | Yes     | No      | 1951.0 | 4.7  |
| 828 | Control | 2018-12-31 | 73 | Male   | 0.97 | 1.74  | 0.00  | 24.09 | No  | Yes | Yes     | No      | 1226.4 | 3.2  |
| 829 | Control | 2018-12-31 | 49 | Male   | 0.92 | 0.32  | 9.92  | 25.59 | Yes | Yes | Yes     | No      | 1090.7 | 6.8  |
| 830 | Control | 2018-12-31 | 72 | Male   | 0.39 | 4.85  | 4.83  | 23.98 | No  | Yes | Yes     | No      | 1712.4 | 7.3  |
| 831 | Control | 2018-12-31 | 59 | Male   | 2.10 | 3.54  | 7.22  | 20.83 | No  | Yes | Yes     | No      | 1023.2 | 11.5 |
| 832 | Control | 2018-12-31 | 76 | Male   | 1.80 | 0.12  | 4.47  | 20.83 | No  | No  | Yes     | No      | 1826.7 | 8.8  |

|     |         |            |    |        |      |       |       |         |     |     |         |         |        |      |
|-----|---------|------------|----|--------|------|-------|-------|---------|-----|-----|---------|---------|--------|------|
| 833 | Control | 2018-12-31 | 69 | Male   | 2.10 | 4.61  | 32.74 | 22.49   | No  | No  | No      | No      | 1645.2 | 9.0  |
| 834 | Control | 2018-12-31 | 70 | Male   | 1.79 | 3.54  | 8.60  | Missing | Yes | No  | Yes     | No      | 1623.5 | 6.0  |
| 835 | Control | 2018-12-31 | 67 | Male   | 0.73 | 5.59  | 11.40 | 21.85   | No  | No  | Yes     | No      | 1614.5 | 10.2 |
| 836 | Control | 2018-12-31 | 75 | Male   | 3.59 | 1.29  | 5.19  | 23.94   | No  | Yes | Yes     | No      | 1423.1 | 13.2 |
| 837 | Control | 2018-12-31 | 74 | Male   | 1.53 | 2.74  | 3.44  | 22.84   | Yes | Yes | Yes     | No      | 1674.1 | 6.9  |
| 838 | Control | 2018-12-31 | 73 | Female | 2.36 | 2.51  | 21.22 | 21.43   | No  | No  | Yes     | No      | 1205.5 | 5.3  |
| 839 | Control | 2018-12-31 | 75 | Male   | 1.63 | 0.39  | 13.83 | 27.82   | Yes | Yes | Yes     | No      | 852.0  | 10.3 |
| 840 | Control | 2018-12-31 | 66 | Male   | 1.88 | 0.63  | 5.86  | 30.11   | Yes | Yes | Yes     | No      | 800.7  | 8.9  |
| 841 | Control | 2018-12-31 | 64 | Male   | 1.91 | 1.00  | 25.58 | 22.50   | Yes | No  | No      | No      | 1405.9 | 7.5  |
| 842 | Control | 2018-12-31 | 64 | Male   | 1.38 | 0.94  | 0.00  | 23.95   | Yes | Yes | Yes     | No      | 1642.9 | 5.7  |
| 843 | Control | 2018-12-31 | 82 | Male   | 3.17 | 1.97  | 19.81 | 30.30   | No  | No  | Yes     | No      | 1259.8 | 5.4  |
| 844 | Control | 2018-12-31 | 77 | Male   | 1.80 | 0.53  | 4.67  | 26.08   | Yes | No  | Yes     | Missing | 1433.1 | 15.0 |
| 845 | Control | 2018-12-31 | 71 | Male   | 0.93 | 4.19  | 7.77  | 25.86   | No  | No  | Yes     | No      | 1638.5 | 1.5  |
| 846 | Control | 2018-12-31 | 73 | Male   | 1.95 | 6.23  | 65.58 | 22.49   | No  | No  | Missing | Missing | 1427.7 | 2.4  |
| 847 | Control | 2018-12-31 | 62 | Male   | 3.30 | 12.63 | 17.45 | 19.96   | No  | No  | Yes     | No      | 1362.0 | 8.0  |
| 848 | Control | 2018-12-31 | 80 | Female | 1.11 | 16.50 | 17.48 | 26.79   | No  | No  | Yes     | No      | 1199.3 | 3.2  |
| 849 | Control | 2018-12-31 | 71 | Female | 2.56 | 12.70 | 8.24  | 25.32   | No  | No  | Yes     | Yes     | 1573.3 | 8.3  |
| 850 | Control | 2018-12-31 | 75 | Male   | 1.73 | 7.40  | 6.48  | 22.16   | Yes | No  | Yes     | No      | 1693.4 | 7.4  |
| 851 | Control | 2018-12-31 | 59 | Female | 1.97 | 24.63 | 11.39 | 25.15   | No  | No  | No      | Yes     | 1522.6 | 9.0  |
| 852 | Control | 2018-12-31 | 68 | Male   | 0.99 | 7.60  | 7.01  | 29.32   | No  | No  | Yes     | Yes     | 1253.5 | 0.3  |
| 853 | Control | 2018-12-31 | 61 | Male   | 2.23 | 10.50 | 6.58  | 26.91   | Yes | Yes | Yes     | No      | 1373.3 | 8.7  |
| 854 | Control | 2018-12-31 | 68 | Female | 3.16 | 3.04  | 33.95 | 25.00   | No  | No  | Yes     | No      | 1165.3 | 3.5  |
| 855 | Control | 2018-12-31 | 79 | Female | 2.00 | 9.70  | 24.52 | 24.39   | No  | No  | Yes     | No      | 1766.8 | 13.0 |
| 856 | Control | 2018-12-31 | 51 | Male   | 1.78 | 13.10 | 5.50  | 28.41   | Yes | No  | Yes     | No      | 1705.2 | 7.8  |
| 857 | Control | 2018-12-31 | 79 | Male   | 1.00 | 10.20 | 20.43 | 23.53   | No  | No  | Yes     | No      | 456.5  | 3.7  |
| 858 | Control | 2018-12-31 | 65 | Male   | 0.68 | 4.09  | 2.57  | 29.03   | Yes | Yes | Yes     | No      | 1152.6 | 6.0  |
| 859 | Control | 2018-12-31 | 63 | Male   | 3.91 | 3.90  | 6.68  | 20.76   | Yes | No  | Yes     | Missing | 1643.6 | 3.7  |
| 860 | Control | 2018-12-31 | 61 | Female | 0.47 | 2.12  | 2.79  | 24.67   | No  | No  | Missing | Missing | 1323.8 | 10.4 |

|     |         |            |    |        |      |       |       |       |     |     |         |         |        |      |
|-----|---------|------------|----|--------|------|-------|-------|-------|-----|-----|---------|---------|--------|------|
| 861 | Control | 2018-12-31 | 64 | Male   | 1.28 | 4.00  | 0.00  | 24.79 | No  | No  | Missing | Missing | 2845.2 | 5.8  |
| 862 | Control | 2018-12-31 | 69 | Female | 0.45 | 1.66  | 28.32 | 19.36 | No  | No  | Yes     | No      | 259.5  | 8.2  |
| 863 | Control | 2018-12-31 | 66 | Male   | 2.44 | 13.51 | 29.84 | 21.26 | No  | No  | Yes     | No      | 733.5  | 9.6  |
| 864 | Control | 2018-12-31 | 67 | Male   | 1.54 | 10.08 | 33.08 | 20.31 | Yes | No  | Yes     | No      | 332.3  | 0.9  |
| 865 | Control | 2018-12-31 | 53 | Female | 0.33 | 6.50  | 0.00  | 23.15 | No  | No  | Missing | Missing | 608.2  | 10.0 |
| 866 | Control | 2018-12-31 | 65 | Male   | 1.61 | 7.58  | 7.15  | 30.86 | Yes | Yes | Missing | Missing | 287.5  | 7.8  |
| 867 | Control | 2018-12-31 | 56 | Female | 0.87 | 2.44  | 0.00  | 25.88 | No  | No  | Missing | Missing | 357.7  | 6.7  |
| 868 | Control | 2018-12-31 | 62 | Male   | 0.96 | 3.37  | 4.36  | 30.08 | No  | No  | Missing | Missing | 151.8  | 5.5  |
| 869 | Control | 2018-12-31 | 65 | Female | 1.19 | 2.68  | 7.87  | 21.29 | No  | No  | No      | No      | 1783.6 | 9.4  |
| 870 | Control | 2018-12-31 | 62 | Female | 1.75 | 0.76  | 9.54  | 21.63 | No  | No  | Yes     | No      | 1500.3 | 6.0  |
| 871 | Control | 2018-12-31 | 61 | Male   | 0.99 | 4.15  | 13.64 | 27.18 | Yes | No  | Yes     | No      | 1304.3 | 7.1  |
| 872 | Control | 2018-12-31 | 61 | Male   | 0.22 | 1.98  | 6.14  | 28.96 | No  | No  | Yes     | No      | 1813.6 | 5.1  |
| 873 | Control | 2018-12-31 | 66 | Female | 0.64 | 5.36  | 2.46  | 23.73 | No  | No  | Yes     | No      | 1582.4 | 7.6  |
| 874 | Control | 2018-12-31 | 65 | Male   | 1.74 | 13.96 | 10.11 | 25.40 | Yes | Yes | Yes     | No      | 1361.8 | 12.5 |
| 875 | Control | 2018-12-31 | 75 | Male   | 1.87 | 6.60  | 15.77 | 21.67 | No  | Yes | Yes     | No      | 1003.8 | 3.1  |
| 876 | Control | 2018-12-31 | 62 | Male   | 1.20 | 2.93  | 2.21  | 25.86 | No  | No  | Missing | Missing | 1153.9 | 16.1 |
| 877 | Control | 2018-12-31 | 69 | Female | 1.79 | 7.57  | 17.11 | 22.48 | No  | Yes | No      | Yes     | 1354.3 | 5.0  |
| 878 | Control | 2018-12-31 | 68 | Male   | 3.73 | 3.61  | 7.19  | 29.39 | No  | No  | Yes     | No      | 1536.5 | 4.5  |
| 879 | Control | 2018-12-31 | 61 | Female | 0.69 | 2.51  | 4.7   | 24.67 | No  | No  | Missing | Missing | 1860.2 | 8.0  |
| 880 | Control | 2018-12-31 | 78 | Female | 3.95 | 20.00 | 5.36  | 26.67 | No  | No  | Yes     | No      | 1097.4 | 4.9  |
| 881 | Control | 2018-12-31 | 62 | Male   | 0.47 | 1.21  | 3.8   | 24.86 | Yes | No  | Missing | Missing | 1377.6 | 7.6  |
| 882 | Control | 2018-12-31 | 68 | Female | 0.87 | 5.72  | 9.74  | 22.19 | No  | No  | Yes     | No      | 1213.8 | 6.9  |
| 883 | Control | 2018-12-31 | 71 | Male   | 1.59 | 3.26  | 5.72  | 15.43 | Yes | Yes | No      | No      | 828.2  | 6.3  |
| 884 | Control | 2018-12-31 | 69 | Male   | 2.89 | 4.33  | 10.11 | 25.91 | Yes | Yes | Missing | Missing | 1349.2 | 8.1  |
| 885 | Control | 2018-12-31 | 71 | Male   | 0.47 | 9.17  | 1.95  | 25.35 | Yes | Yes | Yes     | No      | 3093.5 | 4.2  |
| 886 | Control | 2018-12-31 | 62 | Male   | 1.64 | 4.71  | 7.21  | 23.46 | Yes | No  | Missing | Missing | 1091.2 | 6.7  |
| 887 | Control | 2018-12-31 | 69 | Male   | 2.50 | 0.16  | 8.06  | 18.91 | No  | No  | Yes     | No      | 1946.8 | 8.5  |
| 888 | Control | 2018-12-31 | 65 | Female | 1.27 | 4.51  | 29.65 | 17.48 | No  | No  | Missing | No      | 1676.5 | 5.7  |

|     |         |            |    |        |      |        |       |         |     |     |         |         |        |      |
|-----|---------|------------|----|--------|------|--------|-------|---------|-----|-----|---------|---------|--------|------|
| 889 | Control | 2018-12-31 | 61 | Female | 0.66 | 3.90   | 6.10  | 21.93   | No  | No  | Yes     | No      | 1640.4 | 8.2  |
| 890 | Control | 2018-12-31 | 78 | Male   | 0.79 | 3.30   | 0.00  | 19.47   | Yes | No  | No      | No      | 1151.4 | 10.1 |
| 891 | Control | 2018-12-31 | 75 | Male   | 4.76 | 8.86   | 7.47  | 24.31   | No  | No  | Yes     | No      | 1930.8 | 8.7  |
| 892 | Control | 2018-12-31 | 81 | Male   | 1.84 | 6.02   | 7.02  | 25.64   | No  | No  | Missing | Missing | 1332.7 | 11.8 |
| 893 | Control | 2018-12-31 | 72 | Female | 0.46 | 3.05   | 0.00  | 27.38   | Yes | No  | Missing | Missing | 1462.6 | 9.8  |
| 894 | Control | 2018-12-31 | 81 | Male   | 2.52 | 4.31   | 16.93 | 17.72   | Yes | Yes | Missing | Missing | 1430.0 | 15.5 |
| 895 | Control | 2018-12-31 | 68 | Male   | 1.47 | 1.86   | 7.70  | 23.74   | No  | No  | Missing | No      | 859.2  | 6.9  |
| 896 | Control | 2018-12-31 | 69 | Male   | 1.43 | 2.65   | 52.85 | 23.83   | Yes | Yes | Missing | Missing | 256.7  | 8.0  |
| 897 | Control | 2018-12-31 | 59 | Female | 0.87 | 3.13   | 4.66  | 24.88   | Yes | No  | Yes     | No      | 1864.3 | 5.2  |
| 898 | Control | 2018-12-31 | 65 | Male   | 0.71 | 4.22   | 3     | 24.84   | Yes | No  | Missing | Missing | 483.5  | 5.0  |
| 899 | Control | 2018-12-31 | 60 | Male   | 0.80 | 4.95   | 6.45  | 24.61   | Yes | Yes | Missing | Missing | 972.4  | 2.4  |
| 900 | Control | 2018-12-31 | 71 | Male   | 1.81 | 7.40   | 13.70 | Missing | Yes | Yes | Yes     | No      | 2651.5 | 4.9  |
| 901 | Control | 2018-12-31 | 73 | Male   | 1.00 | 6.15   | 6.67  | 26.37   | No  | Yes | Yes     | No      | 2342.6 | 8.8  |
| 902 | Control | 2018-12-31 | 65 | Male   | 1.18 | 1.67   | 2.7   | 24.86   | Yes | No  | Missing | Missing | 583.5  | 14.8 |
| 903 | Control | 2018-12-31 | 63 | Male   | 0.86 | 1.99   | 6.47  | 20.20   | Yes | Yes | Yes     | No      | 1207.2 | 2.5  |
| 904 | Control | 2018-12-31 | 64 | Male   | 1.03 | 4.39   | 2.22  | 22.65   | No  | Yes | Missing | Missing | 330.7  | 8.9  |
| 905 | Control | 2018-12-31 | 58 | Female | 2.70 | 5.95   | 21.05 | 23.42   | No  | No  | Yes     | No      | 1353.8 | 1.0  |
| 906 | Control | 2018-12-31 | 82 | Male   | 3.00 | 2.80   | 13.51 | 22.03   | No  | No  | Yes     | No      | 1872.2 | 3.2  |
| 907 | Control | 2018-12-31 | 77 | Female | 0.39 | 2.13   | 3.35  | 25.39   | No  | No  | Yes     | No      | 1698.9 | 9.9  |
| 908 | Control | 2018-12-31 | 61 | Female | 0.72 | 1.11   | 3.17  | 27.27   | No  | No  | Yes     | No      | 2207.2 | 5.2  |
| 909 | Control | 2018-12-31 | 71 | Female | 0.64 | 0.65   | 12.11 | 27.99   | No  | No  | Yes     | No      | 1217.5 | 5.8  |
| 910 | Control | 2018-12-31 | 69 | Female | 0.98 | 2.76   | 5.23  | Missing | No  | No  | Yes     | No      | 2043.8 | 14.4 |
| 911 | Control | 2018-12-31 | 77 | Male   | 0.55 | 3.53   | 20.33 | 29.34   | No  | No  | Yes     | No      | 2094.1 | 6.7  |
| 912 | Control | 2018-12-31 | 71 | Male   | 0.94 | 3.45   | 4.12  | 21.31   | No  | No  | Missing | Missing | 374.2  | 8.5  |
| 913 | Control | 2018-12-31 | 73 | Female | 3.74 | 13.90  | 4.41  | 23.97   | No  | No  | Yes     | No      | 1349.8 | 6.5  |
| 914 | Control | 2018-12-31 | 72 | Female | 2.17 | 7.00   | 12.22 | 26.48   | Yes | No  | No      | No      | 1119.8 | 5.7  |
| 915 | Control | 2018-12-31 | 66 | Male   | 1.74 | 162.80 | 8.13  | 25.00   | Yes | Yes | Yes     | No      | 362.7  | 5.0  |
| 916 | Control | 2018-12-31 | 66 | Male   | 6.20 | 12.20  | 16.95 | 22.20   | Yes | Yes | Yes     | No      | 1447.2 | 8.1  |

|     |         |            |    |        |         |         |         |       |     |     |     |    |        |      |
|-----|---------|------------|----|--------|---------|---------|---------|-------|-----|-----|-----|----|--------|------|
| 917 | Control | 2018-12-31 | 65 | Male   | 0.93    | 10.60   | 20.18   | 25.53 | Yes | Yes | Yes | No | 1167.1 | 13.5 |
| 918 | Control | 2018-12-31 | 63 | Female | 0.48    | 0.16    | 6.00    | 24.39 | No  | No  | Yes | No | 741.7  | 10.6 |
| 919 | Control | 2018-12-31 | 61 | Female | 1.71    | 8.40    | 13.31   | 22.37 | Yes | No  | Yes | No | 828.5  | 16.3 |
| 920 | Control | 2018-12-31 | 71 | Female | Missing | Missing | Missing | 21.99 | No  | No  | No  | No | 728.9  | 12.4 |
| 921 | Control | 2018-12-31 | 60 | Female | 1.13    | 4.50    | 8.08    | 26.25 | No  | No  | No  | No | 1160.4 | 15.8 |

CC, colon cancer; RC, rectal cancer.

<sup>1</sup>Control were age ( $\pm$  1 year, extended to 5 years) and sex frequency-matched to CRC cases at a ratio of 2:1.

<sup>2</sup>Individuals smoke at least one cigarette per day for more than six months were defined as current smokers (yes).

<sup>3</sup>Individuals drink at least once per week for more than six months were defined as current drinkers (yes).

<sup>4</sup>Regularly exercising for more than 20 min per day over the last six months was defined as physical activity (yes).

<sup>5</sup>Mean of triplicate measurements and the standard error of mean (SEM). Serum piR-54265 levels were determined from baseline blood of individuals when they were recruited in the cohort.

**Table S6.** Primers and probes used for droplet digital PCR in this study

| RNA       | Primer type                            | Sequence (5' to 3')                                                               |
|-----------|----------------------------------------|-----------------------------------------------------------------------------------|
| piR-54265 | Stem-loop reverse transcription primer | TGACCGTCTGTATGGTTGTTACGACTCCTT<br>CACCTATCCAACCATACAGACGGTCAGGT<br>CAGGCT         |
|           | Forward primer                         | CCTGGAGGTGATGAACTGTCTG                                                            |
|           | Reverse primer                         | TATGGTTGTTACGACTCCTTAC                                                            |
|           | Probe                                  | FAM-CCCTATCCAACCATACAGACGGTCAGG<br>-BHQ1                                          |
| ce/miR-39 | Stem-loop reverse transcription primer | TGAACATCCTCTGGAGGCCAACTGCGTGAG<br>CTTGTTACTCATTCTCAGCCTCCAGAGGA<br>TGTTACAAGCTGAT |
|           | Forward primer                         | CGGCTCACCGGGTGTAATC                                                               |
|           | Reverse primer                         | CAACTGCGTGAGCTTGTTACTC                                                            |
|           | Probe                                  | HEX-ATTTTCTCAGCCTCCAGAGGATGTTCA-<br>BHQ1                                          |



**Table S7.** The piR-54265 levels of 30 serum specimens in two detection batches (copy/ $\mu$ L)

| Batch | P5 <sup>a</sup> | P25 <sup>a</sup> | P50 <sup>a</sup> | P75 <sup>a</sup> | P95 <sup>a</sup> | ICC <sup>b</sup> |
|-------|-----------------|------------------|------------------|------------------|------------------|------------------|
| 1     | 364.51          | 1312.73          | 1876.54          | 3232.74          | 4309.18          | 0.997            |
| 2     | 338.95          | 1325.74          | 2013.73          | 3309.50          | 4448.75          |                  |

<sup>a</sup>P, percentiles.

<sup>b</sup>ICC, intraclass correlation coefficient.

**Table S8.** Comparison of serum piR-54265 with other blood markers for the efficacy of recognizing patients with CRC

|              | N <sup>#</sup> | piR-54265<br>(copy/ $\mu$ L) |       | Methylated<br><i>SEPTIN9</i><br>(+ or -) |      | CEA<br>(ng/mL)   |      | CA19-9<br>(Unit/mL) |      | CA125<br>(Unit/mL) |      |
|--------------|----------------|------------------------------|-------|------------------------------------------|------|------------------|------|---------------------|------|--------------------|------|
|              |                | > 1500 <sup>a</sup>          | %     | + <sup>a</sup>                           | %    | > 5 <sup>a</sup> | %    | > 37 <sup>a</sup>   | %    | > 35 <sup>a</sup>  | %    |
| All patients | 101            | 86                           | 85.1  | 62                                       | 61.4 | 18               | 17.8 | 11                  | 10.9 | 10                 | 9.9  |
| Stage I      | 16             | 15                           | 93.8  | 11                                       | 68.8 | 4                | 25.0 | 2                   | 12.5 | 1                  | 6.3  |
| Stage II     | 38             | 34                           | 89.5  | 20                                       | 52.6 | 6                | 15.8 | 4                   | 10.5 | 5                  | 13.2 |
| Stage III    | 36             | 26                           | 72.2  | 24                                       | 66.7 | 7                | 19.4 | 4                   | 11.1 | 4                  | 11.1 |
| Stage IV     | 11             | 11                           | 100.0 | 7                                        | 63.6 | 1                | 9.1  | 1                   | 9.1  | 0                  | 0    |

<sup>#</sup>data was determined from blood of individuals at diagnosis prior to any treatments. <sup>a</sup>Cut-off value.

**Table S9.** The ability of prediagnostic serum piR-54265, CEA, CA125 and CA19-9 alone or combination for predicting future CRC

| Biomarker                           | AUC (95% CI) for CRC diagnosis at |                      |                      |                      |
|-------------------------------------|-----------------------------------|----------------------|----------------------|----------------------|
|                                     | ≤ 1 year (n = 79)                 | ≤ 2 years (n = 132)  | ≤ 3 years (n = 198)  | ≤ 9 years (n = 307)  |
| piR-54265                           | 0.743 (0.685–0.802)*              | 0.711 (0.660–0.763)* | 0.687 (0.643–0.731)* | 0.642 (0.603–0.681)* |
| CEA                                 | 0.592 (0.520–0.664)               | 0.557 (0.500–0.614)  | 0.529 (0.481–0.577)  | 0.548 (0.508–0.588)  |
| CA125                               | 0.459 (0.403–0.515)               | 0.436 (0.390–0.482)  | 0.423 (0.382–0.464)  | 0.454 (0.416–0.492)  |
| CA19-9                              | 0.429 (0.354–0.504)               | 0.444 (0.385–0.502)  | 0.435 (0.386–0.483)  | 0.487 (0.446–0.528)  |
| piR-54265<br>+ CEA + CA125 + CA19-9 | 0.766 (0.708–0.824)*              | 0.741 (0.694–0.789)* | 0.714 (0.672–0.756)* | 0.654 (0.616–0.692)* |

\* $P < 0.05$  of Z-score test.

**Table S10.** Comparison of prediagnostic serum piR-54265 with other blood markers for the efficacy of recognizing future CRC patients

|             | N <sup>#</sup> | piR-54265<br>(copy/ $\mu$ l) |      | SEPTIN9<br>(+ or -) |      | CEA<br>(ng/ml)   |      | CA19-9<br>(Unit/ml) |      | CA125<br>(Unit/ml) |   |
|-------------|----------------|------------------------------|------|---------------------|------|------------------|------|---------------------|------|--------------------|---|
|             |                | > 1500 <sup>a</sup>          | %    | +                   | %    | > 5 <sup>a</sup> | %    | > 37 <sup>a</sup>   | %    | > 35 <sup>a</sup>  | % |
| Total cases | 143            | 81                           | 56.6 | 48                  | 33.6 | 16               | 11.2 | 17                  | 11.9 | 0                  | 0 |
| 0 year–     | 63             | 36                           | 57.1 | 23                  | 36.5 | 11               | 17.5 | 3                   | 4.8  | 0                  | 0 |
| 1 year–     | 37             | 23                           | 62.2 | 13                  | 35.1 | 2                | 5.4  | 2                   | 5.4  | 0                  | 0 |
| 2 years–    | 37             | 18                           | 48.7 | 11                  | 29.7 | 3                | 8.1  | 1                   | 2.7  | 0                  | 0 |
| 3 years–    | 6              | 4                            | 66.7 | 2                   | 33.3 | 0                | 0    | 0                   | 0    | 0                  | 0 |

<sup>#</sup>Data was determined from baseline blood of individuals when they were recruited in the cohort.

<sup>a</sup>Cut-off value.
